# Supplementary material for: Asymmetric synthesis of chromanone lactonesviavinylogous conjugate addition of butenolide to 2-ester chromones
Source: Royal Society of Chemistry journal article supplement (doi:10.1039/d2sc02541h), 2022-01-01

## **Asymmetric Synthesis of Chromanone Lactones *via* Vinylogous Conjugate Addition of Butenolide to 2-Ester Chromones**

Yi Li, Shuang Xin, Rui Weng, Xiaohua Liu\*, and Xiaoming Feng\*

---

## Table of Contents

|                                                                           |    |
|---------------------------------------------------------------------------|----|
| 1. General remarks .....                                                  | 3  |
| 2. Synthesis of Chromones .....                                           | 3  |
| 3. Preparation of the racemic products .....                              | 6  |
| 4. Preparation of enantiomeric enriched product.....                      | 6  |
| 5. Further transformation of the products into the natural products. .... | 7  |
| 6. Optimization of the reaction conditions. ....                          | 7  |
| 7. Control experiments .....                                              | 8  |
| 8. The list of substrates scope .....                                     | 10 |
| 9. The analytical and spectral characterization data of products .....    | 12 |
| 10. References .....                                                      | 33 |
| 11. Copies of NMR spectra for products. ....                              | 34 |

## 1. General remarks

Enantiomeric excess (e.e.) were determined by UPC<sup>2</sup> analysis using the corresponding commercial chiral column as stated in the experimental procedures at 35 °C. Data for <sup>1</sup>H NMR spectra were recorded on Bruker ASCENDTM 400M (400 MHz) and ASCENDTM 600M (600 MHz). Chemical shifts were reported in ppm from tetramethylsilane with the solvent resonance as the internal standard (CDCl<sub>3</sub>, δ = 7.26). Spectra were reported as follows: chemical shift (δ ppm), multiplicity (s = singlet, d = doublet, t = triplet, q = quartet, m = multiplet, dd = doublet of doublets, dt = doublet of triplets), coupling constants (Hz), integration and assignment. <sup>13</sup>C{<sup>1</sup>H} NMR spectra were collected on ASCENDTM 400M (101 MHz) and ASCENDTM 600M (153 MHz) with complete proton decoupling. <sup>19</sup>F{<sup>1</sup>H} NMR spectra were collected on ASCENDTM 400M (376 MHz) with complete proton decoupling. Chemical shifts are reported in ppm from the tetramethylsilane with the solvent resonance as internal standard (CDCl<sub>3</sub>, δ = 77.0). HRMS was recorded on Thermo Q-Exactive Focus (FTMS+c ESI). The chiral UPC<sup>2</sup> methods were calibrated with the corresponding racemic mixtures. Optical rotations were measured on a Rudolph Autopol V automatic polarimeter and are reported as follows: [α]<sub>D</sub><sup>T</sup> (c g/100 mL, in CHCl<sub>3</sub>). IR spectra were recorded on Bruker TENSOR II IR spectrophotometer. All catalytic reactions were run in dried glassware. All the solvents were purified by usual methods before use. Silica gel for thin-layer chromatography (HG/T2354-92) made in Qingdao Haiyang Chemical Co., Ltd. Unless otherwise indicated, reagents obtained from commercial sources were used without further purification. The chiral *N,N'*-dioxide ligands were synthesized by the same procedure in the literature.<sup>[1]</sup>

## 2. Synthesis of chromones

The chromones were prepared from the corresponding substituted *o*-hydroxyacetophenone according to reported methods.<sup>[2]</sup>

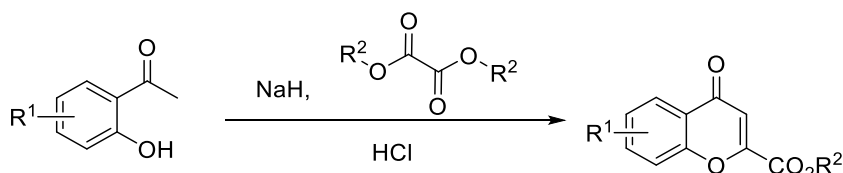

**Procedure:** A solution of the 2'-hydroxy acetophenone derivatives (10 mmol) and the oxalate (11 mmol, 1.1 equiv.) in dry THF (25 mL) were cooled to 0 °C. Into this mixture was added NaH (60 % in oil, 3.5 equiv.). The temperature was allowed to rise to room temperature and stirred overnight. The crude mixture was quenched with MeOH (2.5 mL) and acidified (pH 0 – 1) with concentrated HCl. The resultant heterogeneous mixture was stirred at room temperature for an additional 24 h. MeOH was removed by rotary evaporation and the residue was diluted with EtOAc. The two layers were separated and the aqueous layer was washed with EtOAc (25 mL x 3). The combined organic solution was dried using anhydrous Na<sub>2</sub>SO<sub>4</sub>, filtered, and concentrated under reduced pressure to give the crude product. The crude material was then purified on silica gel column chromatography.

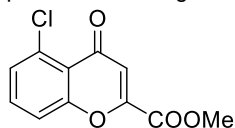

**methyl 5-chloro-4-oxo-4H-chromene-2-carboxylate**, white solid, 43% yield.

<sup>1</sup>H NMR (400 MHz, Chloroform-*d*) δ 7.60 (t, *J* = 8.1 Hz, 1H), 7.52 (d, *J* = 8.4 Hz, 1H), 7.43 (d, *J* = 7.7 Hz, 1H), 7.05 (s, 1H), 4.01 (s, 3H).

<sup>13</sup>C NMR (101 MHz, Chloroform-*d*) δ 176.6, 160.3, 157.1, 150.1, 133.4, 128.4, 121.1, 117.5, 115.8, 53.2.

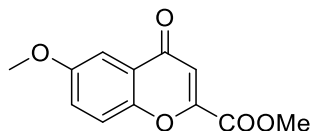

**methyl 6-methoxy-4-oxo-4H-chromene-2-carboxylate**, white solid, 53% yield.

<sup>1</sup>H NMR (400 MHz, Chloroform-*d*) δ 7.61 – 7.45 (m, 2H), 7.34 (dd, *J* = 9.2, 3.1 Hz, 1H), 7.11 (s, 1H), 4.02 (s, 3H), 3.91 (s, 3H).

<sup>13</sup>C NMR (101 MHz, Chloroform-*d*) δ 178.2, 161.1, 157.5, 151.6, 150.8, 125.1, 125.0, 120.2, 114.0, 104.6, 56.0, 53.5.

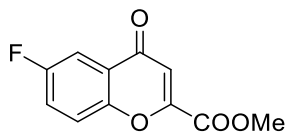

**methyl 6-fluoro-4-oxo-4H-chromene-2-carboxylate**, white solid, 62% yield.

<sup>1</sup>H NMR (400 MHz, Chloroform-*d*) δ 7.83 (dd, *J* = 8.0, 3.1 Hz, 1H), 7.63 (dd, *J* = 9.1, 4.1 Hz, 1H), 7.47 (ddd, *J* = 9.1, 7.5, 3.1 Hz, 1H), 7.10 (s, 1H), 4.02 (s, 3H).

<sup>13</sup>C NMR (101 MHz, Chloroform-*d*) δ 177.6, 161.2, 160.8, 152.2, 123.2, 123.0, 121.0, 121.0, 114.1, 110.8, 110.6, 53.6.

<sup>19</sup>F NMR (376 MHz, Chloroform-*d*) δ -113.64.

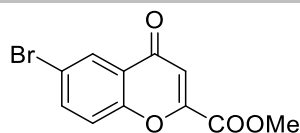

**methyl 6-bromo-4-oxo-4H-chromene-2-carboxylate**, white solid 70% yield.

$^1\text{H NMR}$  (400 MHz, Chloroform-*d*)  $\delta$  8.32 (d,  $J = 2.4$  Hz, 1H), 7.83 (dd,  $J = 9.0, 2.5$  Hz, 1H), 7.51 (d,  $J = 8.9$  Hz, 1H), 7.12 (s, 1H), 4.02 (s, 3H).

$^{13}\text{C NMR}$  (101 MHz, Chloroform-*d*)  $\delta$  176.9, 160.7, 154.7, 152.1, 137.8, 128.4, 125.7, 120.7, 119.6, 114.9, 53.6.

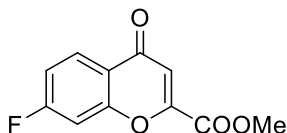

**methyl 7-fluoro-4-oxo-4H-chromene-2-carboxylate**, red solid, 63% yield.

$^1\text{H NMR}$  (400 MHz, Chloroform-*d*)  $\delta$  8.22 (dd,  $J = 8.9, 6.2$  Hz, 1H), 7.30 (dd,  $J = 8.9, 2.4$  Hz, 1H), 7.19 (ddd,  $J = 8.9, 8.0, 2.4$  Hz, 1H), 7.10 (s, 1H), 4.02 (s, 3H).

$^{13}\text{C NMR}$  (101 MHz, Chloroform-*d*)  $\delta$  191.6, 177.2, 160.7, 152.2, 128.4, 115.2, 114.8, 105.6, 105.3, 53.6.

$^{19}\text{F NMR}$  (376 MHz, Chloroform-*d*)  $\delta$  -100.63.

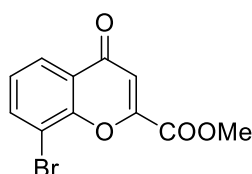

**methyl 8-bromo-4-oxo-4H-chromene-2-carboxylate**, white solid, 66% yield.

$^1\text{H NMR}$  (400 MHz, Chloroform-*d*)  $\delta$  8.15 (d,  $J = 9.4$  Hz, 1H), 7.98 (d,  $J = 9.2$  Hz, 1H), 7.33 (t,  $J = 7.9$  Hz, 1H), 7.14 (s, 1H), 4.04 (s, 3H).

$^{13}\text{C NMR}$  (101 MHz, Chloroform-*d*)  $\delta$  177.71, 160.61, 152.63, 152.24, 138.25, 126.52, 125.72, 125.13, 114.90, 112.41, 53.72, 53.69.

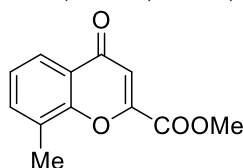

**methyl 8-methyl-4-oxo-4H-chromene-2-carboxylate**, white solid, 65% yield

$^1\text{H NMR}$  (400 MHz, Chloroform-*d*)  $\delta$  8.04 (d,  $J = 8.9$  Hz, 1H), 7.58 (d,  $J = 8.0$  Hz, 1H), 7.34 (t,  $J = 7.6$  Hz, 1H), 7.11 (s, 1H), 4.02 (s, 3H), 2.56 (s, 3H).

$^{13}\text{C NMR}$  (101 MHz, Chloroform-*d*)  $\delta$  178.8, 161.2, 154.5, 135.6, 128.4, 125.5, 124.4, 123.3, 114.6, 53.5, 15.6.

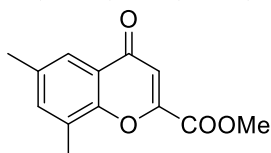

**methyl 6,8-dimethyl-4-oxo-4H-chromene-2-carboxylate**, white solid, 78% yield.

$^1\text{H NMR}$  (400 MHz, Chloroform-*d*)  $\delta$  7.82 (s, 1H), 7.40 (s, 1H), 7.09 (s, 1H), 4.01 (s, 3H), 2.53 (s, 3H), 2.42 (s, 3H).

$^{13}\text{C NMR}$  (101 MHz, Chloroform-*d*)  $\delta$  178.8, 152.8, 152.5, 151.6, 137.0, 135.5, 128.0, 124.1, 122.6, 114.5, 53.4, 20.9, 15.5.

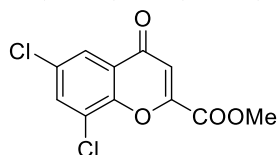

**methyl 6,8-dichloro-4-oxo-4H-chromene-2-carboxylate**, white solid, 70% yield

$^1\text{H NMR}$  (400 MHz, Chloroform-*d*)  $\delta$  8.07 (s, 1H), 7.79 (s, 1H), 7.15 (s, 1H), 4.04 (s, 3H).

$^{13}\text{C NMR}$  (101 MHz, Chloroform-*d*)  $\delta$  176.5, 172.8, 160.4, 152.3, 134.9, 131.8, 126.1, 125.2, 123.9, 114.9, 53.9.

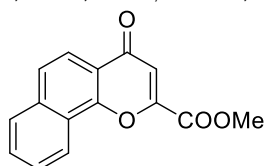

**methyl 4-oxo-4H-benzo[h]chromene-2-carboxylate**, white solid, 81% yield

$^1\text{H NMR}$  (400 MHz, Chloroform-*d*)  $\delta$  8.65 (d,  $J = 8.0$  Hz, 1H), 8.12 (d,  $J = 8.8$  Hz, 1H), 7.95 (d,  $J = 8.2$  Hz, 1H), 7.82 (d,  $J = 8.7$  Hz, 1H), 7.74 (dq,  $J = 14.0, 6.9$  Hz, 2H), 7.28 (s, 1H), 4.08 (s, 3H).

<sup>13</sup>C NMR (101 MHz, Chloroform-*d*) δ 178.1, 161.0, 153.6, 151.4, 136.2, 129.9, 128.1, 127.5, 126.2, 124.0, 121.0, 120.3, 116.2, 53.6.

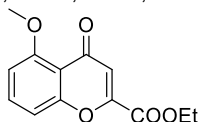

**ethyl 5-methoxy-4-oxo-4H-chromene-2-carboxylate**, white solid, 73% yield

<sup>1</sup>H NMR (600 MHz, Chloroform-*d*) δ 7.62 (t, *J* = 8.4 Hz, 1H), 7.16 (d, *J* = 8.5 Hz, 1H), 7.02 (s, 1H), 6.85 (d, *J* = 8.3 Hz, 1H), 4.44 (q, *J* = 7.1 Hz, 2H), 3.99 (s, 3H), 1.43 (t, *J* = 7.1 Hz, 3H).

<sup>13</sup>C NMR (151 MHz, Chloroform-*d*) δ 177.9, 160.4, 159.6, 157.8, 150.2, 116.3, 115.1, 110.5, 62.8, 56.4, 14.0.

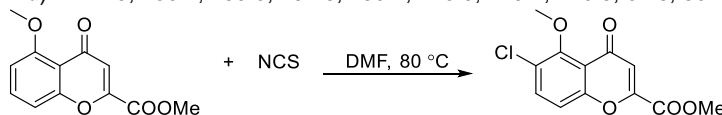

**Procedure:** A solution of the chromone (3.0 mmol) in DMF (15 mL) was heated at 70 °C, and NCS (5.5 mmol, 1.1 equiv.) were added. The reaction mixture was heated to 80 °C for 24 h. The reaction was cooled to rt, H<sub>2</sub>O was added and extracted with EtOAc, wash with H<sub>2</sub>O and brine, dried over Na<sub>2</sub>SO<sub>4</sub>, and filtered. Concentration in a vacuum afforded the crude product, and the residue was purified by silica gel column chromatography to give the product.

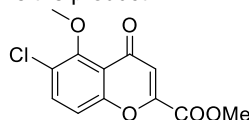

**methyl 6-chloro-5-methoxy-4-oxo-4H-chromene-2-carboxylate**, white solid, 60% yield

<sup>1</sup>H NMR (600 MHz, Chloroform-*d*) δ 7.72 (d, *J* = 9.1 Hz, 1H), 7.36 (d, *J* = 9.1 Hz, 1H), 7.02 (s, 1H), 3.99 (d, *J* = 23.0 Hz, 6H).

<sup>13</sup>C NMR (151 MHz, Chloroform-*d*) δ 176.6, 160.7, 155.8, 155.0, 150.5, 135.2, 125.9, 120.2, 116.0, 115.4, 61.9, 53.6.

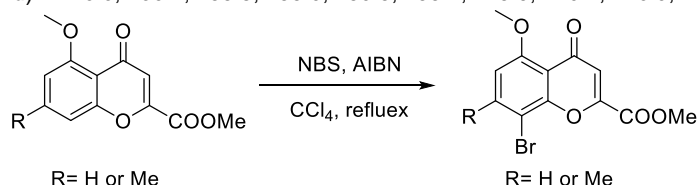

**Procedure:** A solution of chromone (5 mmol) in CCl<sub>4</sub> (15 mL) was heated at 80 °C, and then AIBN (0.5 mmol, 10 mol%) and NBS (5.5 mmol, 1.1 equiv.) were added. The reaction mixture was heated to 80 °C for 7 h. The reaction was cooled to rt, then H<sub>2</sub>O was added and extracted with CH<sub>2</sub>Cl<sub>2</sub>, washed with 1 N HCl and brine, dried over Na<sub>2</sub>SO<sub>4</sub>, and filtered. Concentration in a vacuum afforded the crude product. The residue was purified by silica gel column chromatography to give the product.

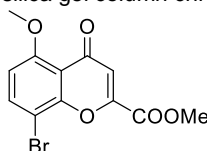

**methyl 8-bromo-5-methoxy-4-oxo-4H-chromene-2-carboxylate**, white solid, 72% yield

<sup>1</sup>H NMR (600 MHz, Chloroform-*d*) δ 7.84 (d, *J* = 8.9 Hz, 1H), 7.05 (s, 1H), 6.78 (d, *J* = 8.9 Hz, 1H), 4.00 (d, *J* = 17.7 Hz, 6H).

<sup>13</sup>C NMR (151 MHz, Chloroform-*d*) δ 160.7, 159.2, 154.0, 150.3, 137.9, 116.7, 116.3, 108.0, 102.3, 56.7.

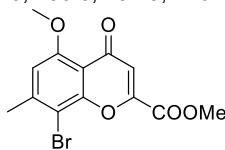

**methyl 8-bromo-5-methoxy-7-methyl-4-oxo-4H-chromene-2-carboxylate**, white solid 92% yield

<sup>1</sup>H NMR (400 MHz, Chloroform-*d*) δ 7.27 (s, 1H), 6.78 (s, 1H), 3.99 (dd, *J* = 14.0, 1.3 Hz, 6H), 2.56 (d, *J* = 1.2 Hz, 3H).

<sup>13</sup>C NMR (151 MHz, Chloroform-*d*) δ 177.4, 160.8, 158.2, 154.1, 150.2, 146.3, 116.5, 109.3, 104.6, 56.6, 53.6, 24.3.

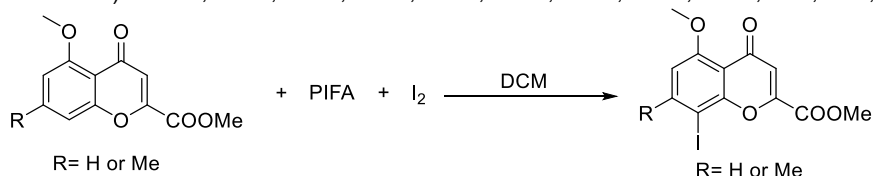

**Procedure:** A solution of the chromone (3.0 mmol) in dry DCM at room temperature was treated with PIFA (1.2 equiv.) and I<sub>2</sub> (0.6 equiv.). The mixture was then stirred at room temperature for 24 h. The solution was then quenched using saturated aqueous sodium bisulfite (30 mL) and extracted using DCM (25 mL × 3). The combined organic solution was dried using anhydrous Na<sub>2</sub>SO<sub>4</sub>, filtered, and concentrated under reduced pressure to give the crude product. The crude material was then purified on silica gel column chromatography.

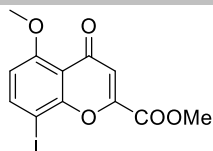

**methyl 8-iodo-5-methoxy-4-oxo-4H-chromene-2-carboxylate**, white solid, 84% yield

$^1\text{H NMR}$  (600 MHz, Chloroform-*d*)  $\delta$  8.56 (s, 1H), 7.08 (s, 1H), 4.03 (s, 3H), 3.91 (s, 3H).

$^{13}\text{C NMR}$  (151 MHz, Chloroform-*d*)  $\delta$  176.0, 160.3, 159.4, 156.3, 151.8, 150.9, 120.0, 116.0, 90.6, 80.7, 62.2, 53.7.

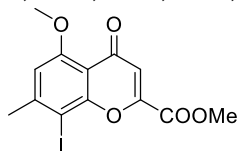

**methyl 8-iodo-5-methoxy-7-methyl-4-oxo-4H-chromene-2-carboxylate**, white solid, 81% yield

$^1\text{H NMR}$  (400 MHz, Chloroform-*d*)  $\delta$  7.02 (s, 1H), 6.83 (s, 1H), 4.00 (d,  $J = 14.6$  Hz, 6H), 2.61 (s, 3H).

### 3. Preparation of the racemic products <sup>[3]</sup>

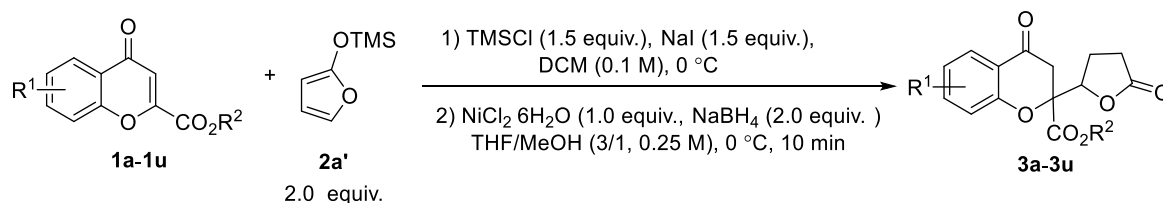

**Procedure:** NaI (0.3 mmol, 1.5 equiv) and TMSCl (0.3 mmol, 1.5 equiv) were added to a solution of the corresponding chromone (0.2 mmol) in anhydrous DCM (2.0 mL), and the mixture was stirred for 10 min at room temperature. Then the reaction mixture was brought to the appropriate temperature, and 2-(trimethylsilyloxy)-furan (0.4 mmol, 2.0 equiv) was added dropwise. The reaction mixture was stirred at this temperature until the reaction was complete, as indicated by thin-layer chromatography (TLC). The reaction mixture was quenched by  $\text{H}_2\text{O}$  and extracted with DCM. The combined organic layers were washed with saturated  $\text{Na}_2\text{S}_2\text{O}_3$  and brine in turn, dried over anhydrous  $\text{Na}_2\text{SO}_4$ , and concentrated under reduced pressure.

The mixture was dissolved in THF/MeOH (3/1, 3.0 mL). At 0 °C,  $\text{NiCl}_2\cdot 6\text{H}_2\text{O}$  (0.2 mmol) and  $\text{NaBH}_4$  (0.4 mmol, 2.0 equiv) were added. The mixture was stirred for 10 min at 0 °C. Saturated  $\text{NH}_4\text{Cl}$  solution (0.5 mL) and water (2 mL) were added. The mixture was extracted by EtOAc (5 mL). The organic layer was concentrated under reduced pressure. The residual product was purified by gel column chromatography.

### 4. Preparation of enantiomeric enriched product

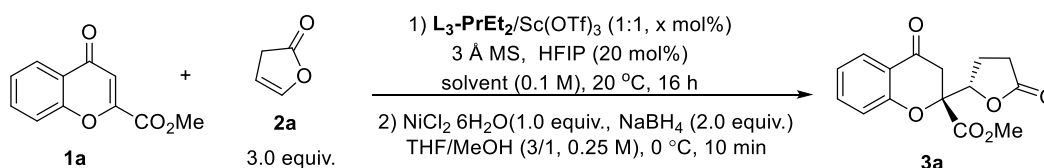

**Procedure:** An oven-dried test tube was charged with the catalyst  $\text{L}_3\text{-PrEt}_2/\text{Sc}(\text{OTf})_3$  (1:1, 1 mol %), **1a** (0.10 mmol), HFIP (0.02 mmol) and 3 Å MS (20 mg) in THF (1 mL) under  $\text{N}_2$  atmosphere. The resulted solution was stirred at 20 °C for 0.5 h, then **2a** (0.3 mmol) was added into the above solution and stirred until the reaction was complete, as indicated by thin-layer chromatography (TLC).

The above mixture was dissolved in THF/MeOH (2/1, 3.0 mL). At 0 °C,  $\text{NiCl}_2\cdot 6\text{H}_2\text{O}$  (0.10 mmol) and  $\text{NaBH}_4$  (0.2 mmol) were added. The mixture was stirred for 10 min at 0 °C. Saturated  $\text{NH}_4\text{Cl}$  solution (0.5 mL) and water (2 mL) were added. The mixture was extracted by EtOAc (5 mL). The organic layer was concentrated under reduced pressure. The residual product was purified by silica gel column chromatography.

## 5. Further transformation of the products into the natural products.

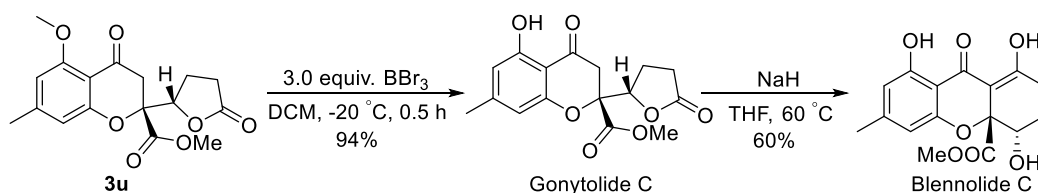

**Procedure:** BBr<sub>3</sub> (0.6 mL of a 2.0 M solution in CH<sub>2</sub>Cl<sub>2</sub>, 1.2 mmol, 3 equiv) was added slowly to a solution of **3u** (133.6 mg, 0.4 mmol, 1.0 equiv, >19:1 dr and >99% ee) in CH<sub>2</sub>Cl<sub>2</sub> (2.0 mL) at -20 °C. The resulting orange solution was stirred for 30 min at -20 °C before being quenched with saturated NH<sub>4</sub>Cl aqueous solution (2.0 mL). The organic layer was separated and the aqueous layer was extracted with CH<sub>2</sub>Cl<sub>2</sub> (3×5 mL). The combined extracts were dried over Na<sub>2</sub>SO<sub>4</sub> and the solvent was evaporated in vacuo. Column chromatography on silica gel (EA/ PE=2:1) provided pure Gonytolide C (120.6 mg, 94%) as a white solid.

### Gonytolide C

[α]<sub>D</sub><sup>25</sup> = 23.5 (c = 0.4 in CHCl<sub>3</sub>), ref 4: [α]<sub>D</sub><sup>25</sup> = 23.1 (c = 0.39 in CHCl<sub>3</sub>)

<sup>1</sup>H NMR (400 MHz, Chloroform-*d*) δ 11.39 (s, 1H), 6.39 (d, *J* = 10.4 Hz, 2H), 4.86 (dd, *J* = 7.8, 5.9 Hz, 1H), 3.74 (s, 3H), 3.19 – 2.85 (m, 2H), 2.81 – 2.53 (m, 2H), 2.43 (dq, *J* = 9.9, 7.8, 6.7 Hz, 2H), 2.31 (s, 3H).

<sup>13</sup>C NMR (101 MHz, Chloroform-*d*) δ 193.1, 175.6, 169.0, 161.7, 159.0, 151.6, 111.0, 108.5, 105.6, 84.0, 53.7, 39.4, 27.6, 22.7.

ESI-HRMS: calcd for C<sub>15</sub>H<sub>14</sub>O<sub>6</sub>Na<sup>+</sup> ([M + Na]<sup>+</sup>) = 343.0788, found 343.0783.

IR (neat): 2923, 1785, 1644, 1570, 1454, 1366, 1263, 1200, 1131, 1074, 1055, 1033, 936, 837, 748 cm<sup>-1</sup>.

**Procedure:** The Gonytolide C (32 mg, 0.1 mmol) and NaH (10 mg, 0.25 mmol, 2.5 equiv) were placed into a flask under a N<sub>2</sub> atmosphere. THF (3 mL) was added to the flask which was warmed up to 60 °C and stirred for 16 h. After cooling to room temperature, 2 M HCl was used to quench the reaction which was extracted twice with EtOAc (10 mL x 2). The organic phase was combined, washed with brine, dried over sodium sulfate, filtered, and concentrated. Purification by column chromatography (PE/EtOAc = 3: 1) afforded Blennolide C (19.3 mg, 60%) as a yellow powder.<sup>[5]</sup>

### Blennolide C

[α]<sub>D</sub><sup>25</sup> = +182.9 (c = 0.04, CHCl<sub>3</sub>), ref 6: [α]<sub>D</sub><sup>25</sup> = +181.7 (c = 0.06, CHCl<sub>3</sub>)

<sup>1</sup>H NMR (400 MHz, Chloroform-*d*) δ 14.04 (s, 1H), 11.27 (s, 1H), 6.52 – 6.12 (m, 2H), 3.70 (s, 3H), 2.82 (dd, *J* = 19.2, 7.0 Hz, 1H), 2.71 – 2.62 (m, 1H), 2.38 (dd, *J* = 19.2, 7.0, Hz, 1H), 2.29 (s, 3H), 2.20 – 2.08 (m, 1H), 2.02 – 1.89 (m, 1H).

<sup>13</sup>C NMR (101 MHz, Chloroform-*d*) δ 186.9, 179.1, 171.2, 161.9, 149.9, 111.7, 108.7, 104.9, 100.1, 83.8, 66.9, 53.4, 24.3, 23.1.

ESI-HRMS: calcd for C<sub>15</sub>H<sub>14</sub>O<sub>6</sub>Na<sup>+</sup> ([M + Na]<sup>+</sup>) = 343.0788, found 343.0785.

IR (neat): 2925, 1786, 1649, 1558, 1459, 1361, 1265, 1244, 1189, 1130, 1076, 1058, 1036, 902, 840, 731 cm<sup>-1</sup>.

## 6. Optimization of the reaction conditions.

### (a) Preliminary screening of the reaction time.

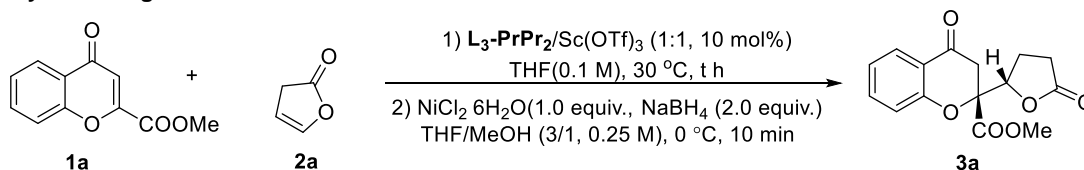

4 h: 19% yield, 94% ee, 4:1 dr  
8 h: 35% yield, 90% ee, 3.6:1 dr  
24 h: 42% yield, 74% ee, 2.3:1 dr

<sup>a</sup>Unless otherwise noted, the reactions were carried out with **1a** (0.1 mmol), **2a** (0.3 mmol), L<sub>3</sub>-PrPr<sub>2</sub>/Sc(OTf)<sub>3</sub> (1:1, 10 mol %) in THF (0.1 M) at 30 °C. Isolated yields. The ee values were determined by UPC<sup>2</sup>, the dr values were determined by the <sup>1</sup>H NMR.

### (b) Screening of the additives.

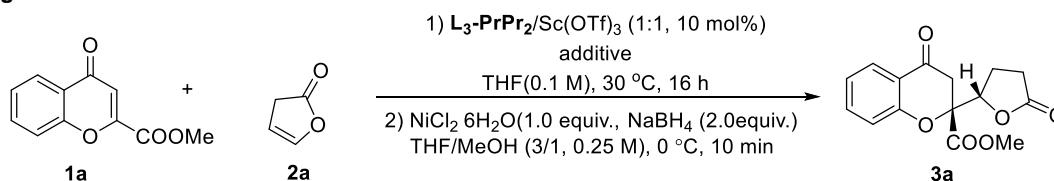

| Entry | additive       | Yield(%) | ee (%) | dr    |
|-------|----------------|----------|--------|-------|
| 1     | 3 Å MS (20 mg) | 56       | >99    | >19:1 |
| 2     | 4 Å MS (20 mg) | 43       | >99    | 19:1  |
| 3     | 5 Å MS (20 mg) | 78       | 99     | 16:1  |

|   |                                         |    |     |       |
|---|-----------------------------------------|----|-----|-------|
| 4 | Na <sub>2</sub> SO <sub>4</sub> (20 mg) | 41 | 99  | 16:1  |
| 5 | HFIP (20 mol%)                          | 46 | 96  | 7:1   |
| 6 | 3 Å MS (20 mg)+ HFIP (20 mol%)          | 82 | >99 | >19:1 |

<sup>a</sup>Unless otherwise noted, the reactions were carried out with **1a** (0.1 mmol), **2a** (0.3 mmol), L<sub>3</sub>-PrPr<sub>2</sub>/Sc(OTf)<sub>3</sub> (1:1, 10 mol %) in THF (0.1 M) and additive at 30 °C. Isolated yields. The ee values were determined by UPC<sup>2</sup>, the dr values were determined by the <sup>1</sup>H NMR.

### (c) Screening of the ligand.

| Entry | Ligand                               | Yield(%) | ee (%) | dr    |
|-------|--------------------------------------|----------|--------|-------|
| 1     | L <sub>3</sub> -PrPr <sub>2</sub>    | 82       | >99    | >19:1 |
| 2     | L <sub>3</sub> -PiPr <sub>2</sub>    | 42       | >99    | 1:1   |
| 3     | L <sub>3</sub> -RaPr <sub>2</sub>    | 23       | 85     | 6:1   |
| 4     | L <sub>3</sub> -PrMe <sub>2</sub>    | 70       | 78     | 9:1   |
| 5     | L <sub>3</sub> -PrEt <sub>2</sub>    | 79       | >99    | 12:1  |
| 6     | L <sub>3</sub> -PrEt <sub>2</sub> Me | 73       | >99    | >19:1 |

<sup>a</sup>Unless otherwise noted, the reactions were carried out with **1a** (0.1 mmol), **2a** (0.3 mmol), ligand/Sc(OTf)<sub>3</sub> (1:1, 10 mol %) in THF (0.1 M), 3 Å MS (20 mg), and HFIP (20 mol%) at 30 °C. Isolated yields. The ee values were determined by UPC<sup>2</sup>, the dr values were determined by the <sup>1</sup>H NMR.

### (d) Screening of the solvents.

| Entry | solvent                              | Yield(%) | ee (%) | dr    |
|-------|--------------------------------------|----------|--------|-------|
| 1     | THF                                  | 79       | >99    | 12:1  |
| 2     | CH <sub>2</sub> Cl <sub>2</sub>      | 56       | >99    | 6:1   |
| 3     | CH <sub>3</sub> CN                   | 73       | 99     | 19:1  |
| 4     | PhMe                                 | 44       | 95     | 5:1   |
| 5     | EA                                   | 74       | >99    | 6:1   |
| 6     | CH <sub>2</sub> ClCH <sub>2</sub> Cl | 58       | 94     | 3.5:1 |

<sup>a</sup>Unless otherwise noted, the reactions were carried out with **1a** (0.1 mmol), **2a** (0.3 mmol), L<sub>3</sub>-PrEt<sub>2</sub>/Sc(OTf)<sub>3</sub> (1:1, 10 mol %) in solvent (0.1 M) and 3 Å MS (20 mg), and HFIP (20 mol%) at 30 °C. Isolated yields. The ee values were determined by UPC<sup>2</sup>, the dr values were determined by the <sup>1</sup>H NMR.

### (e) Screening of the temperature.

| Entry | Temperature (°C) | Yield(%) | ee (%) | dr    |
|-------|------------------|----------|--------|-------|
| 1     | 20               | 83       | >99    | 19:1  |
| 2     | 30               | 79       | >99    | 12:1  |
| 3     | 40               | 70       | 96     | 4:1   |
| 4     | 50               | 40       | 90     | 1.3:1 |

<sup>a</sup>Unless otherwise noted, the reactions were carried out with **1a** (0.1 mmol), **2a** (0.3 mmol), L<sub>3</sub>-PrEt<sub>2</sub>/Sc(OTf)<sub>3</sub> (1:1, 10 mol %) in THF (0.1 M), 3 Å MS (20 mg), and HFIP (20 mol%) at T °C. Isolated yields. The ee values were determined by UPC<sup>2</sup>, the dr values were determined by the <sup>1</sup>H NMR.



## (f) Screening of the amount of catalyst.

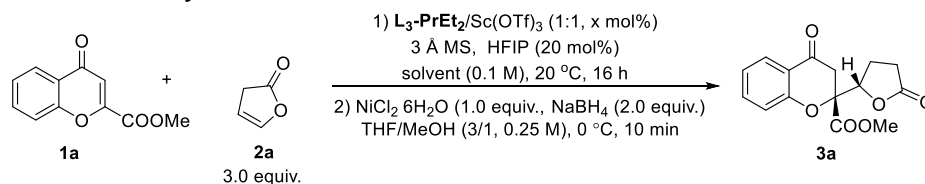

| Entry | x mol% | Yield(%) | ee (%) | dr   |
|-------|--------|----------|--------|------|
| 1     | 10     | 83       | >99    | 19:1 |
| 2     | 5      | 83       | >99    | 19:1 |
| 3     | 2      | 81       | >99    | 19:1 |
| 4     | 1      | 82       | >99    | 19:1 |
| 5     | 0.5    | 49       | >99    | 19:1 |
| 6     | 0.1    | 33       | >99    | 19:1 |
| 7     | 0.05   | 25       | >99    | 19:1 |
| 8     | 0.01   | -        | >99    | 19:1 |

<sup>a</sup>Unless otherwise noted, the reactions were carried out with **1a** (0.1 mmol), **2a** (3 equiv.),  $L_3\text{-PrEt}_2/\text{Sc}(\text{OTf})_3$  (1:1, x mol %) in THF (0.1 M) and 3 Å MS (20 mg), and HFIP (20 mol%) at 20 °C. Isolated yields. The ee values were determined by UPC<sup>2</sup>, the dr values were determined by the <sup>1</sup>H NMR. <sup>b</sup>In THF (0.2 M) for 48 h.

## 7. Control experiments.

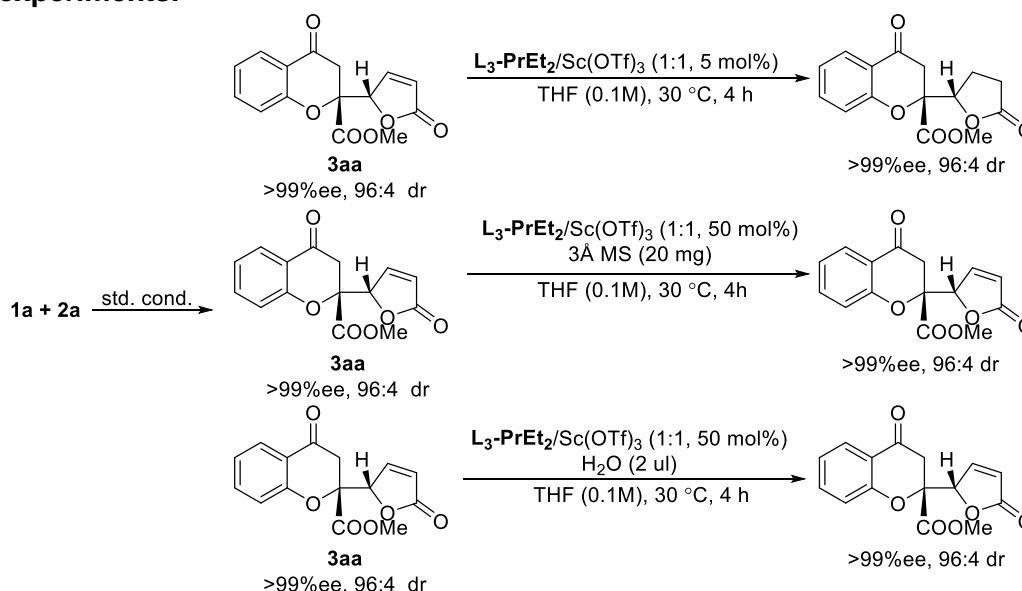

**Procedure:** An oven-dried test tube was charged with the catalyst  $L_3\text{-PrEt}_2/\text{Sc}(\text{OTf})_3$  (1:1, 1 mol %), **1a** (0.10 mmol), HFIP (0.02 mmol) and 3 Å MS (20 mg) THF (1 mL) under  $\text{N}_2$  atmosphere. The resulted solution was stirred at 20 °C for 0.5 h, then **2a** (0.3 mmol) was added into the above solution and stirred until the reaction was complete, as indicated by thin-layer chromatography (TLC).

The mixture crude purified by a short silica gel column chromatography to remove the 3 Å MS and catalyst. the solvent removed in vacuo to get the crude **3a**, then the catalyst  $L_3\text{-PrEt}_2/\text{Sc}(\text{OTf})_3$  (1:1, 5 mol %), additive and 1 ML THF was added, The resulted solution was stirred at 30 °C for 4 h.

The above mixture was dissolved in THF/MeOH (2/1, 3.0 mL). At 0 °C,  $\text{NiCl}_2 \cdot 6\text{H}_2\text{O}$  (0.10 mmol) and  $\text{NaBH}_4$  (0.2 mmol) were added. The mixture was stirred for 10 min at 0 °C. Saturated  $\text{NH}_4\text{Cl}$  solution (0.5 mL) and water (2 mL) were added. The mixture was extracted by EtOAc (5 mL). The organic layer was concentrated under reduced pressure. The residual product was purified by silica gel column chromatography. The ee and dr value determined by UPC<sup>2</sup>.

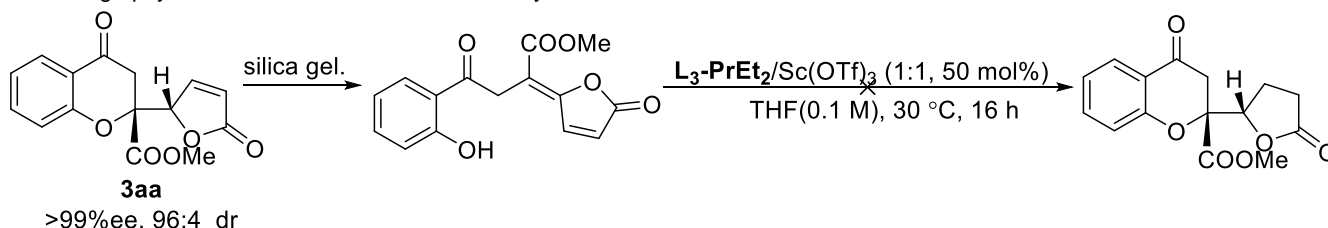

The re-oxo-Michael reaction product was detected and isolated during the column chromatography with silica gel. But this polysubstituted olefin can't converted to **3a** again under the  $L_3\text{-PrEt}_2/\text{Sc}(\text{OTf})_3$  catalysis.

## 8. The list of substrates scope.

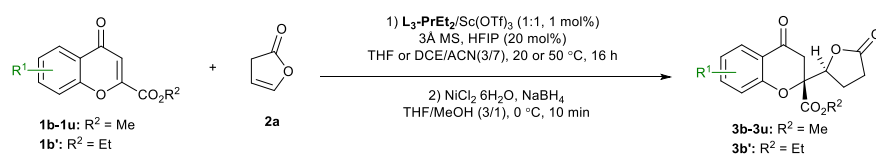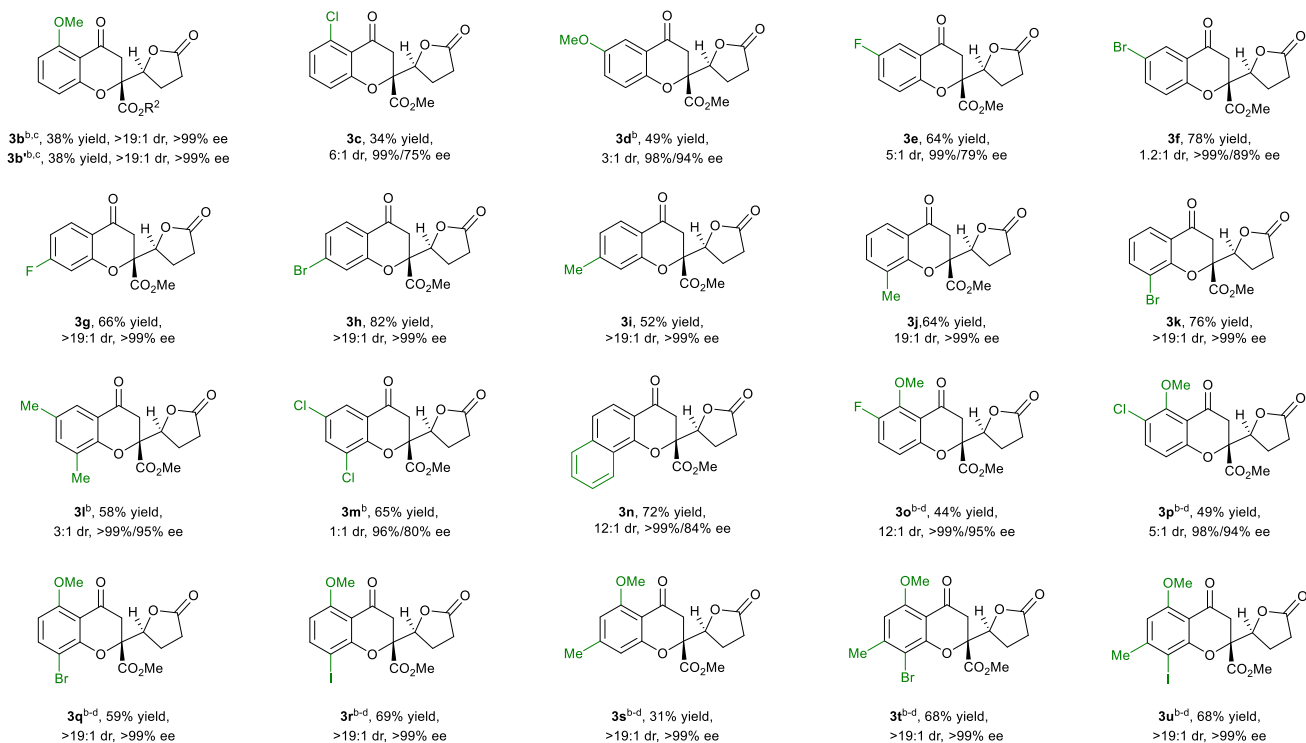

<sup>a</sup>Unless otherwise noted, the reactions were carried out with **1** (0.1 mmol), **2a** (0.3 mmol),  $L_3\text{-PrEt}_2/\text{Sc}(\text{OTf})_3$  (1:1, 1 mol%) in THF (0.1 M) at 20 °C for 16 hours. Then,  $\text{NiCl}_2 \cdot 6\text{H}_2\text{O}$  (1.0 equiv),  $\text{NaBH}_4$  (2.0 equiv) in THF/MeOH (3/1, 0.25 M) at 0 °C for 10 min. Isolated yield of **3**. The ee values were determined by UPC<sup>2</sup>, and the d.r. values were determined by the <sup>1</sup>H NMR. <sup>b</sup> $L_3\text{-PrEt}_2/\text{Sc}(\text{OTf})_3$  (5 mol %). <sup>c</sup>At 50 °C. <sup>d</sup>DCE/MeCN (3:7, 0.1 M) as the solvent.

**Scope limitation:**

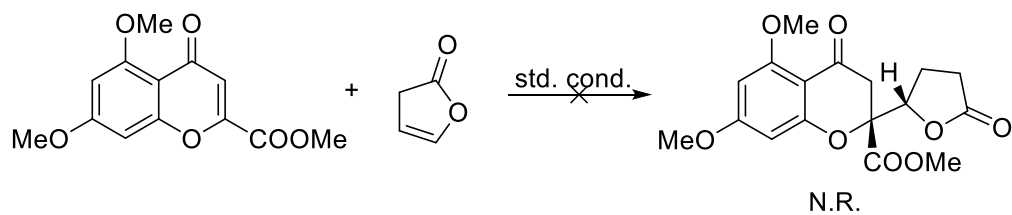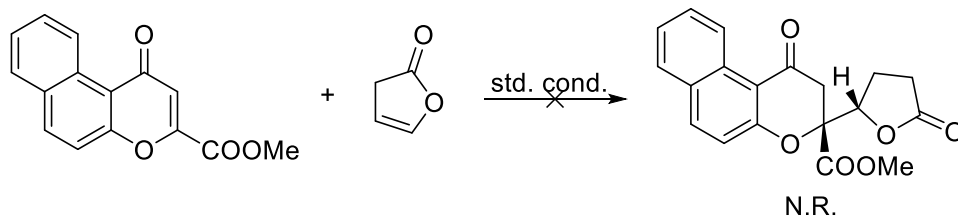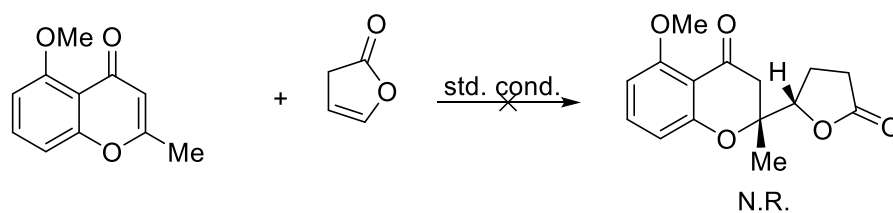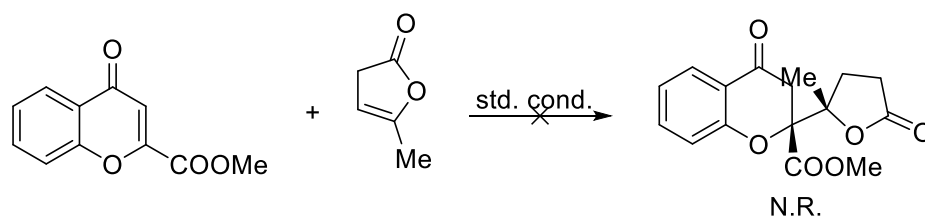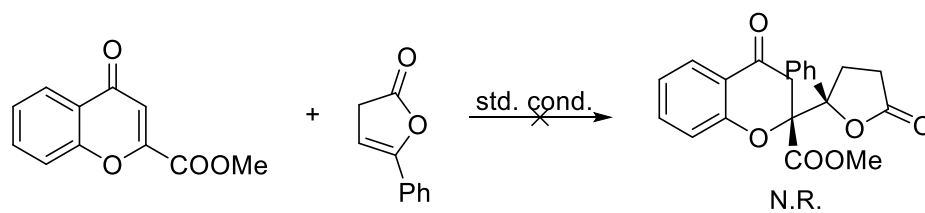

## 9. The analytical and spectral characterization data of the products

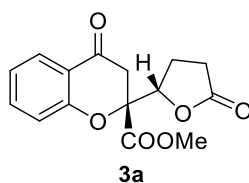

### 3a: methyl (R)-4-oxo-2-((S)-5-oxotetrahydrofuran-2-yl)chromane-2-carboxylate

Following the typical procedure, white solid **3a** was isolated in 83% yield (23.9 mg) and >99% ee, 19:1 dr.  $[\alpha]^{30}_D = 76.8$  ( $c = 0.194$  in  $\text{CHCl}_3$ ). M.p. = 148.1-150.2 °C

**UPC<sup>2</sup>** (chiral IC-3 column),  $\text{CO}_2/\text{MeOH} = 93/7$ , flow rate 1.5 mL/min,  $\lambda = 254$  nm, retention time: (major isomer)  $t_1 = 16.1$  min,  $t_2 = 19.4$  min; (minor isomer)  $t_1 = 18.1$  min,  $t_2 = 13.6$  min

**<sup>1</sup>H NMR** (400 MHz,  $\text{Chloroform-}d$ ).  $\delta$  7.85 (d,  $J = 9.5$  Hz, 1H), 7.61 – 7.46 (m, 1H), 7.16 – 6.98 (m, 2H), 4.96 – 4.78 (m, 1H), 4.35 (t,  $J = 7.1$  Hz, 1H), 3.70 (s, 3H), 3.17 – 2.87 (m, 2H), 2.80 – 2.66 (m, 1H), 2.67 – 2.55 (m, 1H), 2.50 (t,  $J = 8.2$  Hz, 2H), 2.27 (p,  $J = 7.5$  Hz, 1H).

**<sup>13</sup>C NMR** (100 MHz,  $\text{CDCl}_3$ ).  $\delta$  188.0, 175.7, 169.1, 159.8, 136.9, 126.8, 122.4, 120.4, 118.2, 84.5, 81.2, 53.5, 40.2, 27.7, 22.1.

**ESI-HRMS**: calcd for  $\text{C}_{15}\text{H}_{14}\text{O}_6\text{Na}^+$  ( $[\text{M} + \text{Na}]^+$ ) = 329.0422, found 329.0416.

**IR** (neat): 2921, 1785, 1756, 1693, 1608, 1305, 1199, 1132, 1705, 1037, 943, 867, 769  $\text{cm}^{-1}$ .

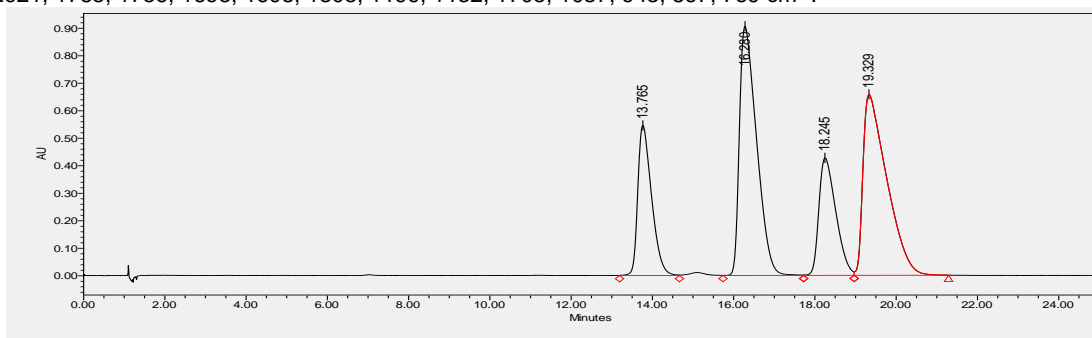

|   | Retention Time | Area     | % Area |
|---|----------------|----------|--------|
| 1 | 13.765         | 12842818 | 16.38  |
| 2 | 16.280         | 26541284 | 33.85  |
| 3 | 18.245         | 12327924 | 15.72  |
| 4 | 19.329         | 26699445 | 34.05  |

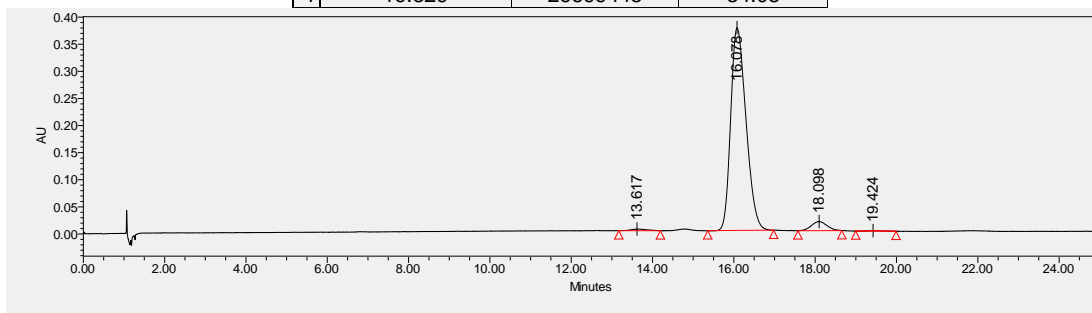

|   | Retention Time | Area    | % Area |
|---|----------------|---------|--------|
| 1 | 13.617         | 78360   | 0.76   |
| 2 | 16.078         | 9739434 | 94.73  |
| 3 | 18.098         | 445324  | 4.33   |
| 4 | 19.424         | 17978   | 0.17   |

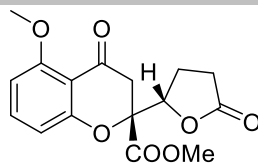

**3b**

**3b: methyl (R)-5-methoxy-4-oxo-2-((S)-5-oxotetrahydrofuran-2-yl)chromane-2-carboxylate**

Following the typical procedure, white solid **3b** was isolated in 38% yield (12.1 mg) and >99% ee/75% ee, >19:1 dr.  $[\alpha]_D^{29} = 73.4$  ( $c = 0.158$  in  $\text{CHCl}_3$ ). M.p. = 194.2-196.1 °C

**UPC<sup>2</sup>** (chiral IA-3 column),  $\text{CO}_2/\text{MeOH} = 93/7$ , flow rate 1.5 mL/min,  $\lambda = 254$  nm, retention time: (major isomer)  $t_1 = 6.2$  min,  $t_2 = 11.2$  min.

**<sup>1</sup>H NMR** (400 MHz, Chloroform-*d*).  $\delta$  7.45 (t,  $J = 8.4$  Hz, 1H), 6.70 (d,  $J = 8.3$  Hz, 1H), 6.57 (d,  $J = 8.4$  Hz, 1H), 4.87 (dd,  $J = 7.9, 5.7$  Hz, 1H), 3.90 (s, 3H), 3.71 (s, 3H), 3.12 – 2.84 (m, 2H), 2.82 – 2.53 (m, 2H), 2.53 – 2.29 (m, 2H).

**<sup>13</sup>C NMR** (100 MHz,  $\text{CDCl}_3$ ).  $\delta$  186.4, 175.7, 169.0, 161.3, 160.5, 136.8, 110.9, 110.1, 104.8, 84.0, 56.3, 53.5, 41.4, 27.7, 22.0.

**ESI-HRMS**: calcd for  $\text{C}_{16}\text{H}_{16}\text{O}_7\text{Na}^+$  ( $[\text{M} + \text{Na}]^+$ ) = 343.0788, found 343.0783.

**IR** (neat): 2923, 1782, 1756, 1686, 1603, 1577, 1473, 1438, 1339, 1259, 1197, 1134, 1103, 1077, 1048, 790, 745  $\text{cm}^{-1}$ .

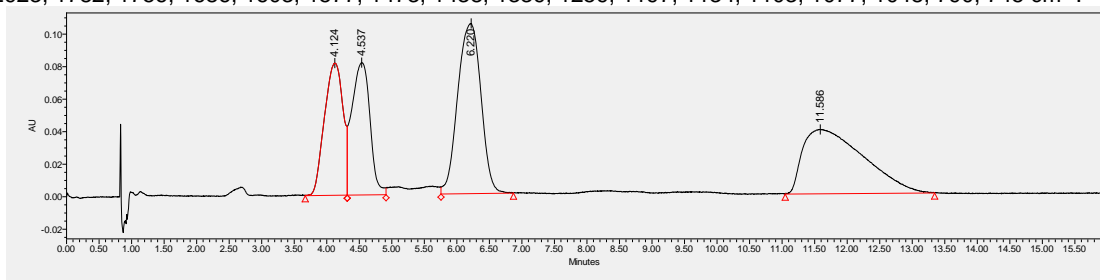

|   | Retention Time | Area    | % Area |
|---|----------------|---------|--------|
| 1 | 4.124          | 1610793 | 19.25  |
| 2 | 4.537          | 1580308 | 18.89  |
| 3 | 6.220          | 2595397 | 31.02  |
| 4 | 11.586         | 2579389 | 30.83  |

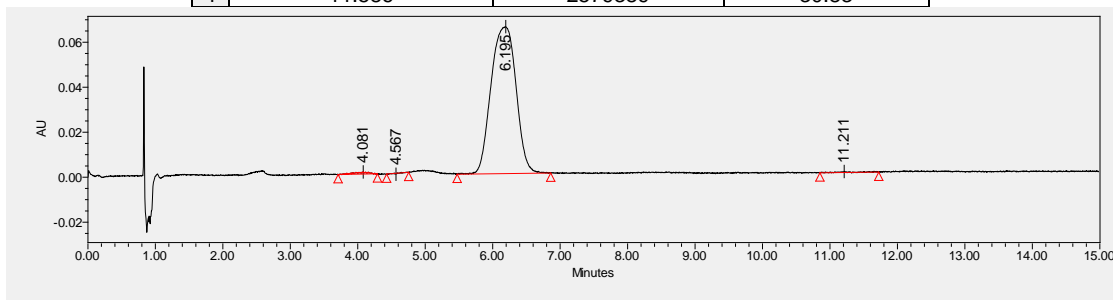

|   | Retention Time | Area    | % Area |
|---|----------------|---------|--------|
| 1 | 4.081          | 13718   | 0.80   |
| 2 | 4.567          | 1695    | 0.10   |
| 3 | 6.195          | 1683658 | 98.64  |
| 4 | 11.211         | 7737    | 0.45   |

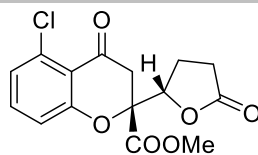

**3c**

**3c: methyl (R)-5-chloro-4-oxo-2-((S)-5-oxotetrahydrofuran-2-yl)chromane-2-carboxylate**

Following the typical procedure, white solid **3c** was isolated in 34% yield (11.2 mg) >99% ee/75% ee, 6:1 dr.  $[\alpha]_D^{27} = 72.0$  ( $c = 0.118$  in  $\text{CHCl}_3$ ). M.p. = 123.1-124.5 °C

**UPC<sup>2</sup>** (chiral AS-3 column),  $\text{CO}_2/\text{MeOH} = 95/5$ , flow rate 1.5 mL/min,  $\lambda = 254$  nm, retention time: (major isomer)  $t_1 = 5.6$  min,  $t_2 = 6.7$  min; (minor isomer)  $t_1 = 3.8$  min,  $t_2 = 4.3$  min.

**<sup>1</sup>H NMR** (400 MHz, Chloroform-*d*).  $\delta$  7.41 (t,  $J = 8.1$  Hz, 1H), 7.15 – 6.95 (m, 2H), 4.94 – 4.88 (m, 1H), 3.74 (d,  $J = 2.5$  Hz, 3H), 3.19 – 2.92 (m, 2H), 2.79 – 2.52 (m, 2H), 2.44 (dtd,  $J = 10.0, 7.5, 7.0, 2.9$  Hz, 2H).

**<sup>13</sup>C NMR** (100 MHz,  $\text{CDCl}_3$ ).  $\delta$  185.9, 175.5, 168.6, 161.2, 135.5, 134.2, 125.6, 117.8, 117.1, 84.1, 80.9, 53.6, 42.2, 27.7, 21.9.

**ESI-HRMS**: calcd for  $\text{C}_{15}\text{H}_{13}\text{ClO}_6\text{Na}^+$  ( $[\text{M} + \text{Na}]^+$ ) = 347.0293 and 349.0263, found 347.0287 and 349.0255.

**IR** (neat): 2933, 1851, 1785, 1755, 1698, 1595, 1566, 1451, 1318, 1266, 1196, 1132, 1071, 1051, 949, 901, 767  $\text{cm}^{-1}$ :

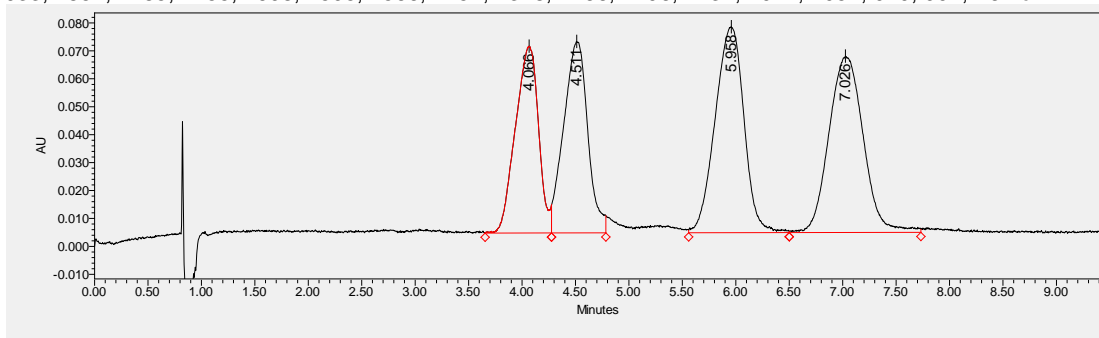

|   | Retention Time | Area    | % Area |
|---|----------------|---------|--------|
| 1 | 4.066          | 1005764 | 20.70  |
| 2 | 4.511          | 1066966 | 21.96  |
| 3 | 5.958          | 1378499 | 28.37  |
| 4 | 7.026          | 1408371 | 28.98  |

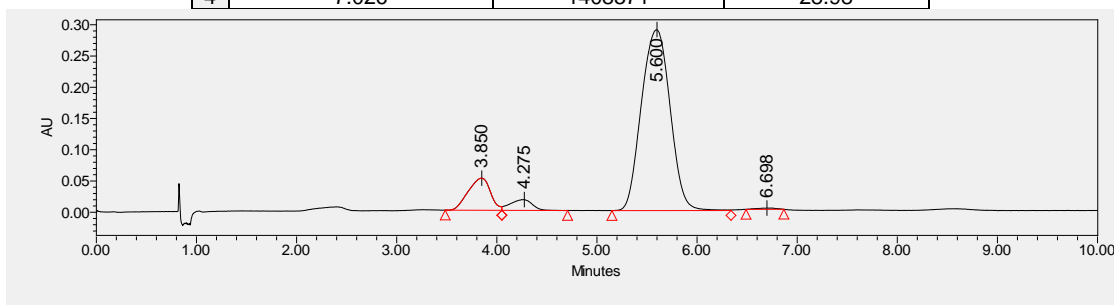

|   | Retention Time | Area    | % Area |
|---|----------------|---------|--------|
| 1 | 3.850          | 790430  | 11.52  |
| 2 | 4.275          | 266424  | 3.88   |
| 3 | 5.600          | 5778619 | 84.21  |
| 4 | 6.698          | 26899   | 0.39   |

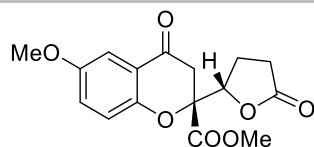

**3d**

**3d: methyl (R)-6-methoxy-4-oxo-2-((S)-5-oxotetrahydrofuran-2-yl)chromane-2-carboxylate**

Following the typical procedure, white solid **3d** was isolated in 49% yield (15.6 mg) and 98% ee/94% ee, 3:1 dr.  $[\alpha]_D^{26} = 51.2$  ( $c = 0.186$  in  $\text{CHCl}_3$ ). M.p. = 134.3-135.9 °C

**UPC<sup>2</sup>** (chiral OD-3 column),  $\text{CO}_2/\text{MeOH} = 90/10$ , flow rate 1.5 mL/min,  $\lambda = 254$  nm, retention time: (major isomer)  $t_1 = 5.1$  min,  $t_2 = 5.9$  min; (minor isomer)  $t_1 = 4.2$  min,  $t_2 = 3.9$  min.

**<sup>1</sup>H NMR** (400 MHz,  $\text{CDCl}_3$ ).  $\delta$  7.18 – 7.10 (m, 1H), 7.07 – 6.96 (m, 1H), 4.94 – 4.85 (dd,  $J = 8.4, 5.6$  Hz, 1H), 3.80 (s, 3H), 3.70 (d,  $J = 2.4$  Hz, 3H), 3.01 (m, 2H), 2.87 – 2.40 (m, 4H).

**<sup>13</sup>C NMR** (100 MHz,  $\text{CDCl}_3$ ).  $\delta$  188.1, 175.7, 169.3, 154.7, 154.4, 125.9, 120.2, 119.5, 107.2, 84.6, 81.2, 55.8, 53.5, 40.2, 27.9, 22.1.

**ESI-HRMS**: calcd for  $\text{C}_{16}\text{H}_{16}\text{O}_7\text{Na}^+$  ( $[\text{M} + \text{Na}]^+$ ) = 343.0788, found 343.0782.

**IR** (neat): 2921, 1785, 1691, 1488, 1432, 1283, 1203, 1131, 1058, 1033, 943, 835, 765  $\text{cm}^{-1}$ .

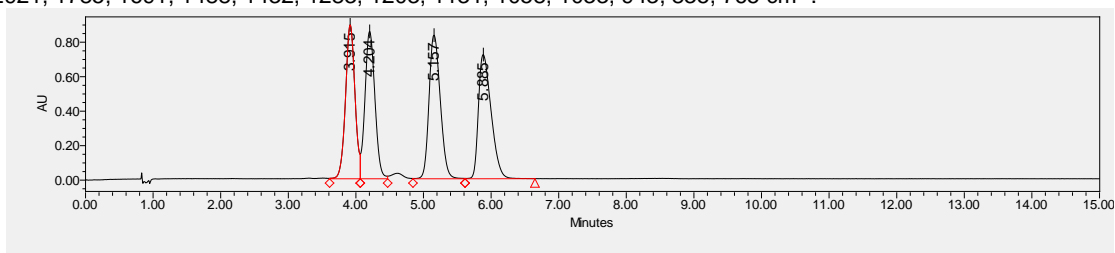

|   | Retention Time | Area    | % Area |
|---|----------------|---------|--------|
| 1 | 3.915          | 8640774 | 23.74  |
| 2 | 4.204          | 8728321 | 23.99  |
| 3 | 5.157          | 9634435 | 26.48  |
| 4 | 5.885          | 9386874 | 25.79  |

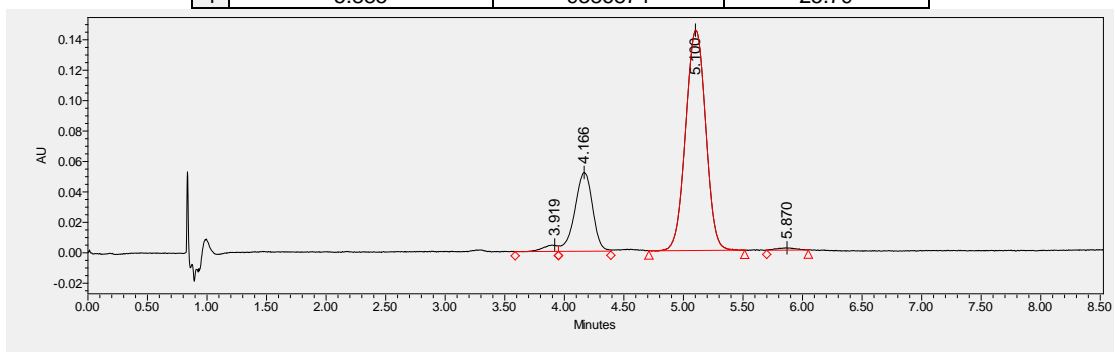

|   | Retention Time | Area    | % Area |
|---|----------------|---------|--------|
| 1 | 3.919          | 35823   | 1.57   |
| 2 | 4.166          | 539229  | 23.63  |
| 3 | 5.100          | 1690880 | 74.09  |
| 4 | 5.870          | 16114   | 0.71   |

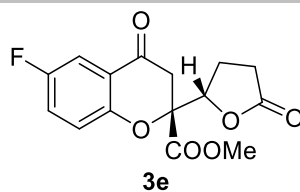

**3e: methyl (R)-6-fluoro-4-oxo-2-((S)-5-oxotetrahydrofuran-2-yl)chromane-2-carboxylate**

Following the typical procedure, white solid **3e** was isolated in 64% yield (19.6 mg) and 99% ee/79% ee, 5:1 dr.  $[\alpha]^{25}_D = 58.3$  ( $c = 0.312$  in  $\text{CHCl}_3$ ). M.p. = 138.1-140.3 °C

**UPC<sup>2</sup>** (chiral IC-3 column),  $\text{CO}_2/\text{MeOH} = 91/9$ , flow rate 1.5 mL/min,  $\lambda = 254$  nm, retention time: (major isomer)  $t_1 = 7.4$  min,  $t_2 = 8.3$  min; (minor isomer)  $t_1 = 7.8$  min,  $t_2 = 6.4$  min.

**<sup>1</sup>H NMR** (400 MHz,  $\text{CDCl}_3$ ).  $\delta$  7.49 (dt,  $J = 8.0, 2.9$  Hz, 1H), 7.32 – 7.22 (m, 1H), 7.15 – 7.04 (m, 1H), 4.90 (dd,  $J = 7.9, 6.0$  Hz, 1H), 3.71 (d,  $J = 3.0$  Hz, 3H), 3.24 – 2.86 (m, 2H), 2.86 – 2.55 (m, 2H), 2.54 – 2.37 (m, 2H).

**<sup>13</sup>C NMR** (100 MHz,  $\text{CDCl}_3$ ).  $\delta$  187.2, 175.5, 168.8, 158.9 (d,  $J = 244.4$  Hz), 155.9, 124.5 (d,  $J = 25.3$  Hz), 120.9 (d,  $J = 6.1$  Hz), 119.9 (d,  $J = 7.1$  Hz), 112.07 (d,  $J = 24.2$  Hz), 84.7, 81.0, 53.6, 40.0, 27.7, 22.0.

**<sup>19</sup>F NMR** (376 MHz,  $\text{CDCl}_3$ )  $\delta$  -119.81.

**ESI-HRMS**: calcd for  $\text{C}_{15}\text{H}_{13}\text{FO}_6\text{Na}^+$  ( $[\text{M} + \text{Na}]^+$ ) = 331.0588, found 331.0583.

**IR** (neat): 2922, 1785, 1697, 1621, 1484, 1437, 1273, 1273, 1190, 1126, 1071, 1034, 943, 835  $\text{cm}^{-1}$ .

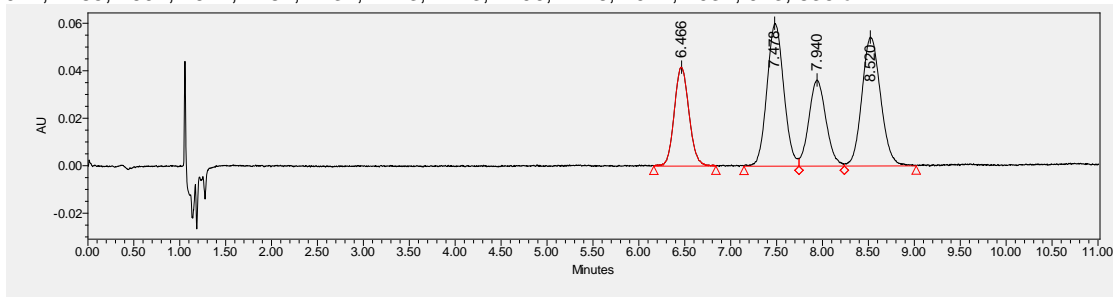

|   | Retention Time | Area   | % Area |
|---|----------------|--------|--------|
| 1 | 6.466          | 464264 | 18.82  |
| 2 | 7.478          | 764441 | 30.99  |
| 3 | 7.940          | 467414 | 18.95  |
| 4 | 8.520          | 770269 | 31.23  |

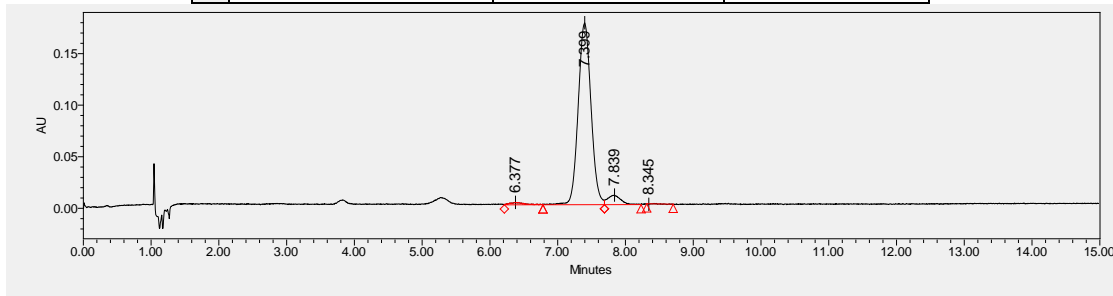

|   | Retention Time | Area    | % Area |
|---|----------------|---------|--------|
| 1 | 6.377          | 31797   | 1.29   |
| 2 | 7.399          | 2310622 | 93.56  |
| 3 | 7.839          | 123428  | 5.00   |
| 4 | 8.345          | 3877    | 0.16   |



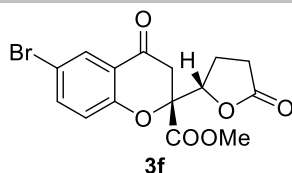

**3f: methyl (R)-6-bromo-4-oxo-2-((S)-5-oxotetrahydrofuran-2-yl)chromane-2-carboxylate**

Following the typical procedure, colourless oil **3f** was isolated in 78% yield (28.6 mg) and 94% ee/89% ee, 1.2:1 dr.  $[\alpha]_D^{25} = 5.0$  ( $c = 0.222$  in  $\text{CHCl}_3$ ).

**UPC<sup>2</sup>** (chiral IC-3 column),  $\text{CO}_2/\text{MeOH} = 90/10$ , flow rate 1.5 mL/min,  $\lambda = 254$  nm, retention time: (major isomer)  $t_1 = 19.9$  min,  $t_2 = 23.8$  min; (minor isomer)  $t_1 = 21.0$ ,  $t_2 = 16.4$  min.

**<sup>1</sup>H NMR** (400 MHz, Chloroform-*d*).  $\delta$  7.95 (t,  $J = 2.8$  Hz, 1H), 7.62 (ddd,  $J = 8.7, 6.1, 2.5$  Hz, 1H), 7.00 (dd,  $J = 20.7, 8.8$  Hz, 1H), 4.90 (dd,  $J = 7.6, 6.4$  Hz, 1H), 3.72 (d,  $J = 2.4$  Hz, 3H), 3.50 – 2.87 (m, 2H), 2.86 – 2.65 (m, 1H), 2.65 – 2.31 (m, 3H).

**<sup>13</sup>C NMR** (100 MHz,  $\text{CDCl}_3$ ).  $\delta$  187.7, 175.9, 168.8, 158.4, 139.2, 129.2, 121.5, 120.1, 115.2, 85.3, 79.7, 53.7, 41.1, 27.8, 22.0.

**ESI-HRMS**: calcd for  $\text{C}_{15}\text{H}_{13}\text{BrO}_6\text{Na}^+$  ( $[\text{M} + \text{Na}]^+$ ) = 390.9788 and 392.9767, found 390.9778 and 392.9754.

**IR** (neat): 2921, 2850, 1787, 1754, 1697, 1649, 1599, 1536, 1468, 1416, 1275, 1199, 1138, 1061, 833, 765  $\text{cm}^{-1}$ .

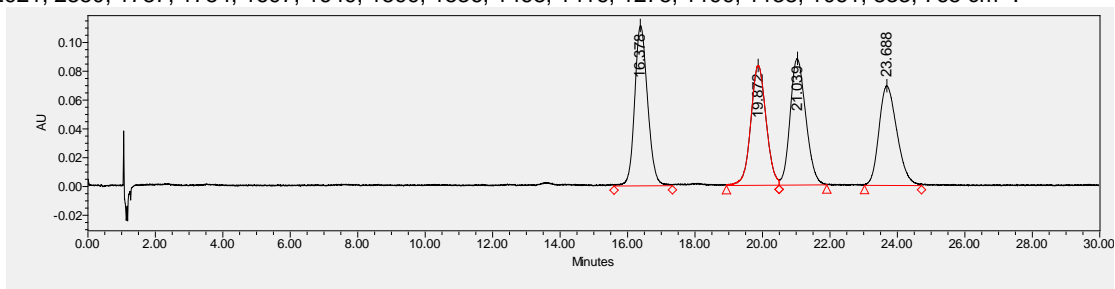

|   | Retention Time | Area    | % Area |
|---|----------------|---------|--------|
| 1 | 16.378         | 2960998 | 26.96  |
| 2 | 19.872         | 2621630 | 23.87  |
| 3 | 21.039         | 2830060 | 25.77  |
| 4 | 23.688         | 2570516 | 23.40  |

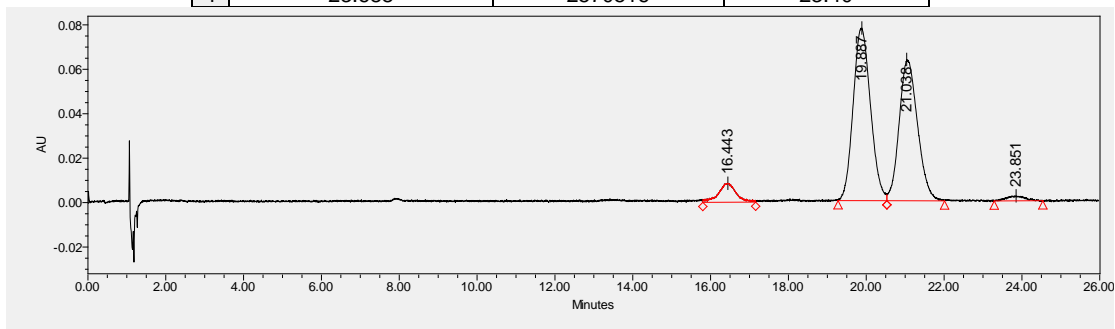

|   | Retention Time | Area    | % Area |
|---|----------------|---------|--------|
| 1 | 16.443         | 264314  | 5.48   |
| 2 | 19.887         | 2407599 | 49.89  |
| 3 | 21.038         | 2081699 | 43.14  |
| 4 | 23.851         | 72110   | 1.49   |

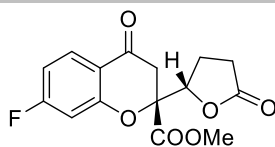

**3g**

**3g: methyl (R)-7-fluoro-4-oxo-2-((S)-5-oxotetrahydrofuran-2-yl)chromane-2-carboxylate**

Following the typical procedure, white solid **3g** was isolated in 66% yield (20.2 mg) and >99% ee, >19:1 dr.  $[\alpha]_D^{25} = 31.1$  ( $c = 0.364$  in  $\text{CHCl}_3$ ). M.p. = 174.1-178.2 °C

**UPC<sup>2</sup>** (chiral AD-3 column),  $\text{CO}_2/\text{MeOH} = 93/7$ , flow rate 1.5 mL/min,  $\lambda = 254$  nm, retention time: (major isomer)  $t_1 = 4.0$  min,  $t_2 = 5.4$  min; (minor isomer)  $t_1 = 2.6$  min,  $t_2 = 4.5$  min.

**<sup>1</sup>H NMR** (400 MHz, Chloroform-*d*).  $\delta$  7.99 – 7.74 (m, 1H), 6.94 – 6.74 (m, 2H), 4.91 (dd,  $J = 7.7, 6.2$  Hz, 1H), 3.72 (s, 3H), 3.24 – 2.83 (m, 2H), 2.83 – 2.55 (m, 2H), 2.55 – 2.35 (m, 2H).

**<sup>13</sup>C NMR** (100 MHz,  $\text{CDCl}_3$ ).  $\delta$  186.5, 175.9, 169.2 (d,  $J = 256.0$  Hz), 168.7, 166.6, 161.4, 129.52 (d,  $J = 11.1$  Hz), 117.3, 111.0 (d,  $J = 22.0$  Hz), 105.34 (d,  $J = 25.1$  Hz), 85.1, 80.9, 53.7, 39.9, 27.7, 22.0.

**<sup>19</sup>F NMR** (376 MHz,  $\text{CDCl}_3$ )  $\delta$  -98.42.

**ESI-HRMS**: calcd for  $\text{C}_{15}\text{H}_{13}\text{FO}_6\text{Na}^+$  ( $[\text{M} + \text{Na}]^+$ ) = 331.0588, found 331.0581.

**IR** (neat): 2922, 1785, 1756, 1695, 1440, 1285, 1261, 1199, 978, 856, 817, 753  $\text{cm}^{-1}$ .

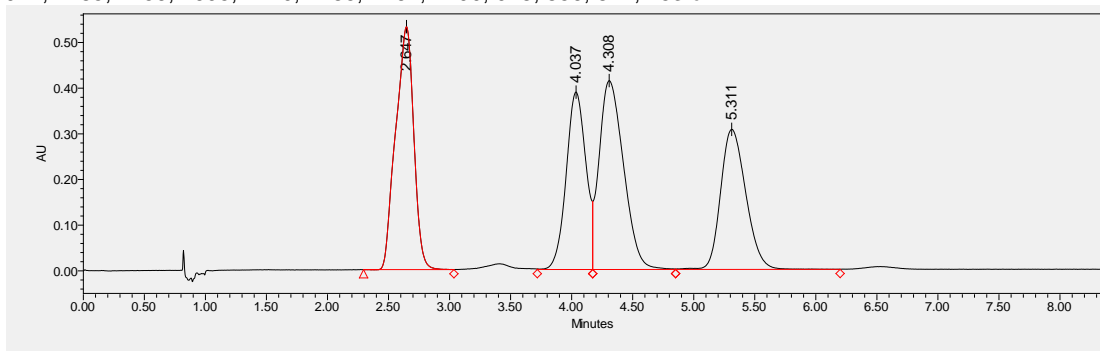

|   | Retention Time | Area    | % Area |
|---|----------------|---------|--------|
| 1 | 2.647          | 5476006 | 27.39  |
| 2 | 4.037          | 4356584 | 21.79  |
| 3 | 4.308          | 5754047 | 28.78  |
| 4 | 5.311          | 4403389 | 22.03  |

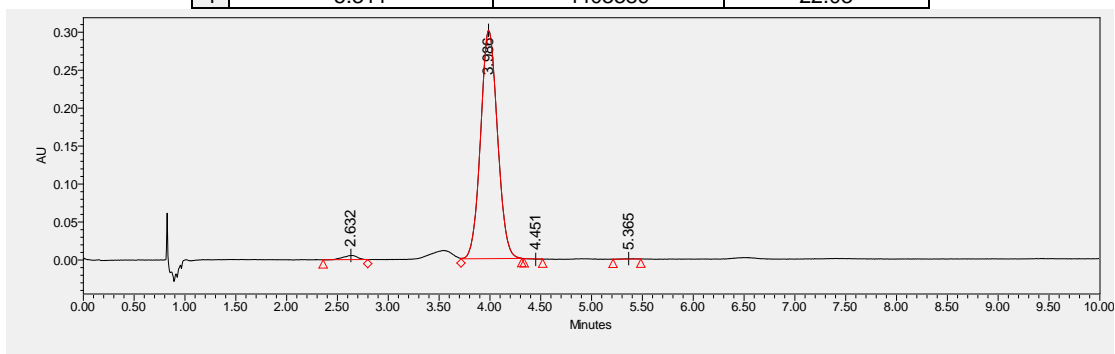

|   | Retention Time | Area    | % Area |
|---|----------------|---------|--------|
| 1 | 2.632          | 53010   | 1.50   |
| 2 | 3.986          | 3463663 | 98.33  |
| 3 | 4.451          | 2430    | 0.07   |
| 4 | 5.365          | 3241    | 0.09   |

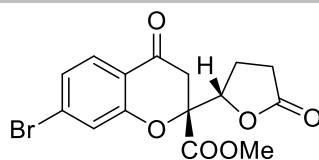

**3h**

**3h: methyl (R)-7-bromo-4-oxo-2-((S)-5-oxotetrahydrofuran-2-yl)chromane-2-carboxylate**

Following the typical procedure, colourless oil **3h** was isolated in 82% yield (31.0 mg) and >99% ee, >19:1 dr.  $[\alpha]^{25}_D = 31.1$  ( $c = 0.588$  in  $\text{CHCl}_3$ ). M.p. = 178.1-164.3 °C

**UPC<sup>2</sup>** (chiral AD-3 column),  $\text{CO}_2/\text{MeOH} = 93/7$ , flow rate 1.5 mL/min,  $\lambda = 254$  nm, retention time: (major isomer)  $t_1 = 8.5$  min,  $t_2 = 11.4$  min; (minor isomer)  $t_1 = 4.9$  min,  $t_2 = 7.8$  min.

**<sup>1</sup>H NMR** (400 MHz, Chloroform-*d*).  $\delta$  7.70 (d,  $J = 8.4$  Hz, 1H), 7.34 (d,  $J = 1.8$  Hz, 1H), 7.22 (dd,  $J = 8.4, 1.8$  Hz, 1H), 4.90 (dd,  $J = 7.5, 6.3$  Hz, 1H), 3.72 (s, 3H), 3.19 – 2.84 (m, 2H), 2.80 – 2.54 (m, 2H), 2.51 – 2.38 (m, 2H).

**<sup>13</sup>C NMR** (100 MHz,  $\text{CDCl}_3$ ).  $\delta$  187.0, 175.4, 168.6, 159.8, 131.3, 127.9, 126.0, 121.3, 119.2, 84.9, 80.8, 53.6, 40.0, 27.6, 21.9.

**ESI-HRMS**: calcd for  $\text{C}_{15}\text{H}_{13}\text{BrO}_6\text{Na}^+$  ( $[\text{M} + \text{Na}]^+$ ) = 390.9788 and 392.9767, found 390.9782 and 392.9760.

**IR** (neat): 2922, 1785, 1695, 1594, 1566, 1418, 1283, 1202, 1137, 1074, 944, 913, 879, 814, 752  $\text{cm}^{-1}$ .

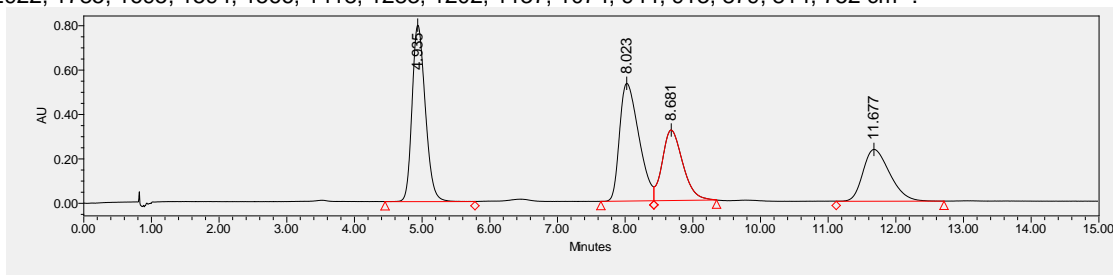

|   | Retention Time | Area     | % Area |
|---|----------------|----------|--------|
| 1 | 4.935          | 10785898 | 31.41  |
| 2 | 8.023          | 10479315 | 30.51  |
| 3 | 8.681          | 6674259  | 19.43  |
| 4 | 11.677         | 6403362  | 18.65  |

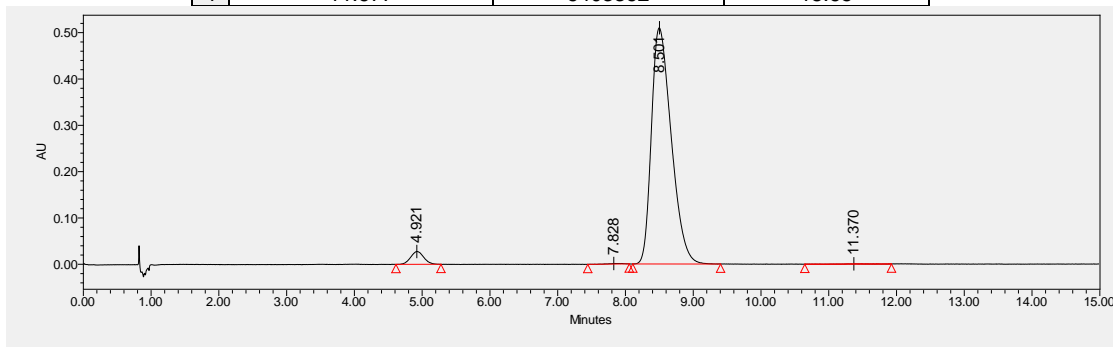

|   | Retention Time | Area     | % Area |
|---|----------------|----------|--------|
| 1 | 4.921          | 374078   | 3.48   |
| 2 | 7.828          | 18645    | 0.17   |
| 3 | 8.501          | 10345528 | 96.24  |
| 4 | 11.370         | 11899    | 0.11   |

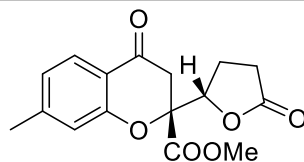

**3i**

**3i: methyl (R)-7-methyl-4-oxo-2-((S)-5-oxotetrahydrofuran-2-yl)chromane-2-carboxylate**

Following the typical procedure, colourless oil **3i** was isolated in 52% yield (15.7 mg) and >99% ee, >19:1 dr.  $[\alpha]_D^{25} = 53.8$  ( $c = 0.234$  in  $\text{CHCl}_3$ ). M.p. = 148.1-150.2 °C

**UPC<sup>2</sup>** (chiral OX-3 column),  $\text{CO}_2/\text{MeOH} = 93/7$ , flow rate 1.5 mL/min,  $\lambda = 254$  nm, retention time: (major isomer)  $t_1 = 3.6$  min,  $t_2 = 5.7$  min; (minor isomer)  $t_1 = 2.7$  min,  $t_2 = 4.9$  min.

**<sup>1</sup>H NMR** (400 MHz, Chloroform-*d*).  $\delta$  7.73 (d,  $J = 8.0$  Hz, 1H), 7.00 – 6.79 (m, 2H), 4.89 (dd,  $J = 8.0, 5.6$  Hz, 1H), 3.71 (s, 3H), 3.15 – 2.81 (m, 2H), 2.84 – 2.41 (m, 4H), 2.39 (s, 3H).

**<sup>13</sup>C NMR** (100 MHz,  $\text{CDCl}_3$ ).  $\delta$  187.5, 175.7, 169.1, 148.7, 126.7, 123.7, 118.1, 118.1, 84.5, 81.1, 40.1, 27.7, 22.0.

**ESI-HRMS**: calcd for  $\text{C}_{16}\text{H}_{16}\text{O}_6\text{Na}^+$  ( $[\text{M} + \text{Na}]^+$ ) = 327.0839, found 327.0833.

**IR** (neat): 2922, 1785, 1757, 1688, 1617, 1507, 1457, 1294, 1250, 1154, 1073, 817, 751  $\text{cm}^{-1}$ .

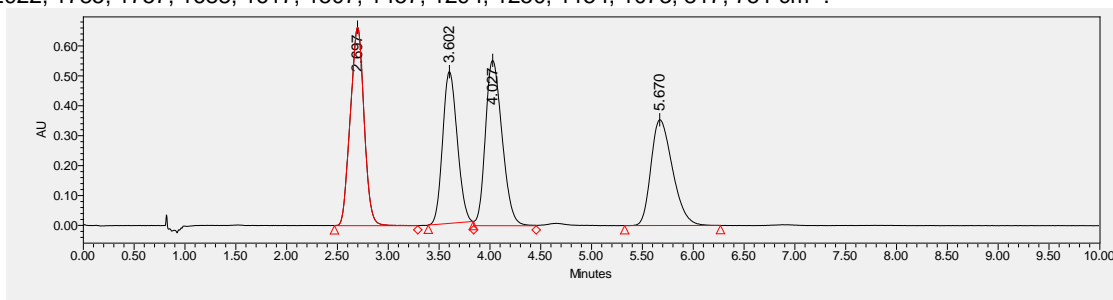

|   | Retention Time | Area    | % Area |
|---|----------------|---------|--------|
| 1 | 2.697          | 6232475 | 27.35  |
| 2 | 3.602          | 5045821 | 22.14  |
| 3 | 4.027          | 6309581 | 27.69  |
| 4 | 5.670          | 5199256 | 22.82  |

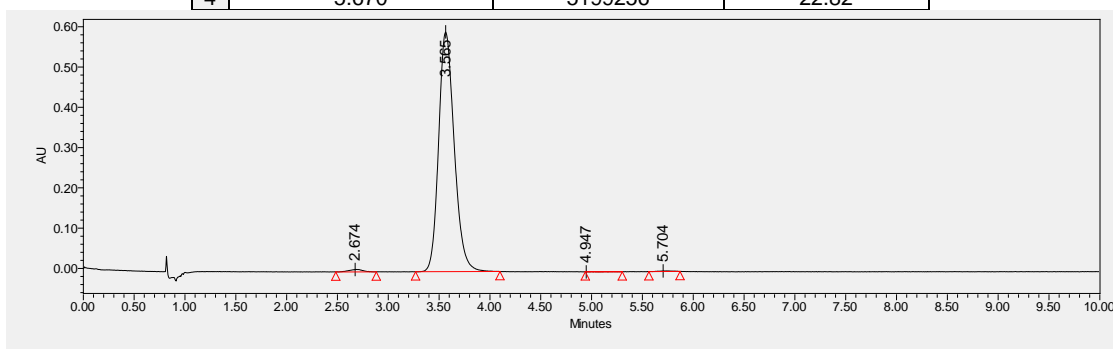

|   | Retention Time | Area    | % Area |
|---|----------------|---------|--------|
| 1 | 2.674          | 57614   | 0.90   |
| 2 | 3.565          | 6344676 | 98.82  |
| 3 | 4.947          | 3428    | 0.05   |
| 4 | 5.704          | 14948   | 0.23   |

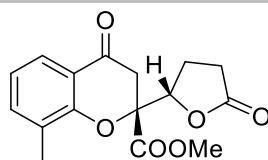

**3j**

**3j: methyl (R)-8-methyl-4-oxo-2-((S)-5-oxotetrahydrofuran-2-yl)chromane-2-carboxylate**

Following the typical procedure, colourless oil **3j** was isolated in 64% yield (19.4 mg) and >99% ee, 19:1 dr.  $[\alpha]_D^{25} = 76.2$  ( $c = 0.328$  in  $\text{CHCl}_3$ ). M.p. = 148.1-150.2 °C

**UPC<sup>2</sup>** (chiral OX-3 column),  $\text{CO}_2/\text{MeOH} = 95/5$ , flow rate 1.5 mL/min,  $\lambda = 254$  nm, retention time: (major isomer)  $t_1 = 3.6$ ,  $t_2 = 5.7$  min. (minor isomer)  $t_1 = 2.8$  min,  $t_2 = 2.5$  min.

**<sup>1</sup>H NMR** (400 MHz, Chloroform-*d*). 7.69 (dd,  $J = 7.9, 1.7$  Hz, 1H), 7.41 (ddd,  $J = 7.2, 1.9, 1.0$  Hz, 1H), 6.97 (t,  $J = 7.6$  Hz, 1H), 4.92 (dd,  $J = 8.2, 4.6$  Hz, 1H), 3.69 (s, 3H), 3.20 – 2.87 (m, 2H), 2.51 (d,  $J = 8.2$  Hz, 4H), 2.29 (s, 3H).

**<sup>13</sup>C NMR** (100 MHz,  $\text{CDCl}_3$ ).  $\delta$  188.3, 175.7, 169.1, 158.0, 137.7, 127.5, 124.4, 121.9, 120.1, 84.9, 81.2, 53.5, 40.3, 27.6, 22.0, 15.6.

**ESI-HRMS**: calcd for  $\text{C}_{16}\text{H}_{16}\text{O}_6\text{Na}^+$  ( $[\text{M} + \text{Na}]^+$ ) = 327.0839, found 327.0833.

**IR** (neat): 2922, 1785, 1757, 1691, 1600, 1431, 1297, 1202, 1137, 1077, 1038, 944, 790, 745  $\text{cm}^{-1}$ .

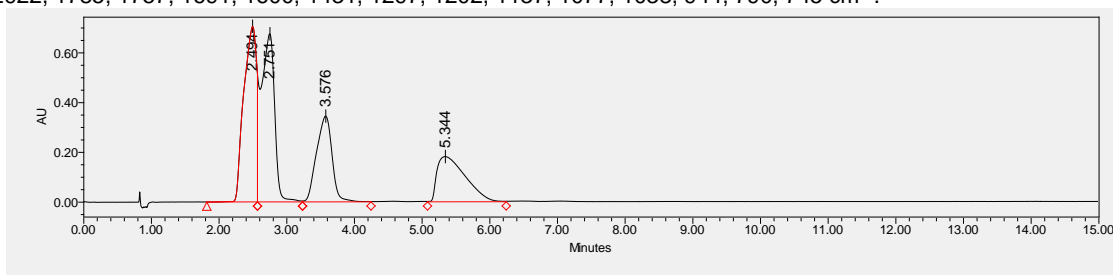

|   | Retention Time | Area    | % Area |
|---|----------------|---------|--------|
| 1 | 2.494          | 8982114 | 30.72  |
| 2 | 2.751          | 9470768 | 32.39  |
| 3 | 3.576          | 5496304 | 18.80  |
| 4 | 5.344          | 5293330 | 18.10  |

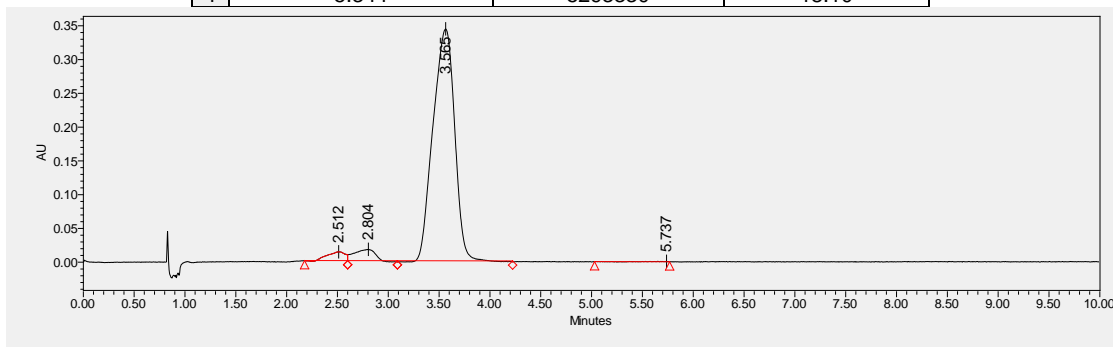

|   | Retention Time | Area    | % Area |
|---|----------------|---------|--------|
| 1 | 2.512          | 161340  | 2.93   |
| 2 | 2.804          | 245960  | 4.47   |
| 3 | 3.565          | 5087979 | 92.45  |
| 4 | 5.737          | 8341    | 0.15   |

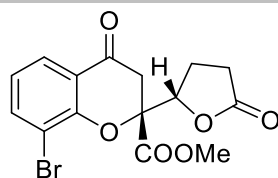

**3k**

**3k: methyl (R)-8-bromo-4-oxo-2-((S)-5-oxotetrahydrofuran-2-yl)chromane-2-carboxylate**

Following the typical procedure, colourless oil **3k** was isolated in 76% yield (28.0 mg) and >99% ee, >19:1 dr.  $[\alpha]^{25}_D = 27.0$  ( $c = 0.508$  in  $\text{CHCl}_3$ ). M.p. = 148.1-150.2 °C

**UPC<sup>2</sup>** (chiral OX-3 column),  $\text{CO}_2/\text{MeOH} = 93/7$ , flow rate 1.5 mL/min,  $\lambda = 254$  nm, retention time: (major isomer)  $t_1 = 3.8$  min,  $t_2 = 3.1$  min; (minor isomer)  $t_1 = 2.5$  min,  $t_2 = 2.3$  min.

**<sup>1</sup>H NMR** (400 MHz,  $\text{CH}_2\text{Cl}_2$ ).  $\delta$  7.80 (ddd,  $J = 7.8, 5.3, 1.6$  Hz, 2H), 6.97 (t,  $J = 7.8$  Hz, 1H), 4.95 (dd,  $J = 7.4, 4.6$  Hz, 1H), 3.72 (s, 3H), 3.25 – 2.79 (m, 3H), 2.73 – 2.36 (m, 3H).

**<sup>13</sup>C NMR** (100 MHz,  $\text{CDCl}_3$ ).  $\delta$  187.3, 175.7, 168.4, 156.3, 139.9, 126.0, 123.0, 121.5, 111.9, 85.8, 80.9, 53.7, 40.2, 27.5, 22.2.

**ESI-HRMS**: calcd for  $\text{C}_{15}\text{H}_{13}\text{BrO}_6\text{Na}^+$  ( $[\text{M} + \text{Na}]^+$ ) = 390.9788 and 392.9767, found 390.9779 and 392.9758.

**IR** (neat): 2921, 1785, 1757, 1697, 1505, 1462, 1438, 1285, 1126, 1003, 867, 750  $\text{cm}^{-1}$ .

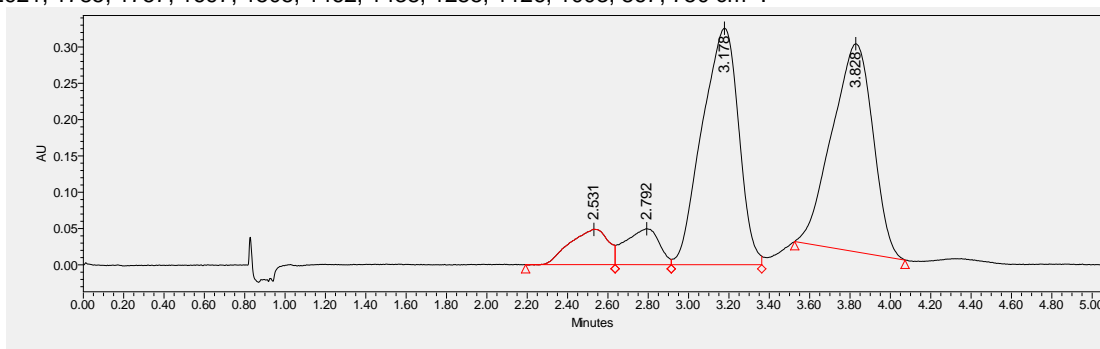

|   | Retention Time | Area    | % Area |
|---|----------------|---------|--------|
| 1 | 2.531          | 641104  | 6.86   |
| 2 | 2.792          | 571724  | 6.12   |
| 3 | 3.178          | 4103627 | 43.92  |
| 4 | 3.828          | 4026857 | 43.10  |

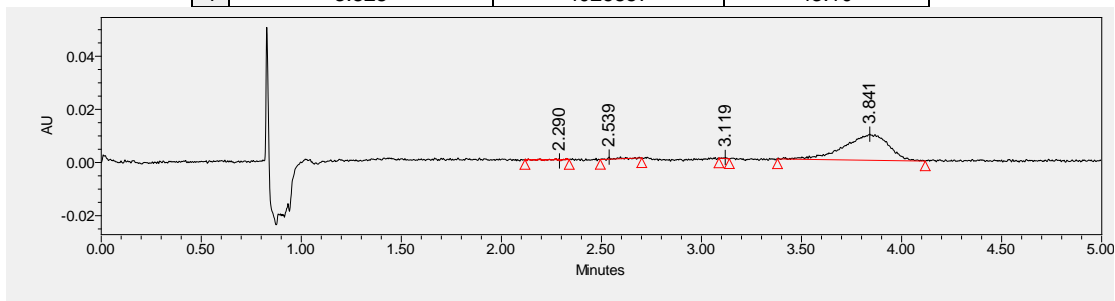

|   | Retention Time | Area   | % Area |
|---|----------------|--------|--------|
| 1 | 2.290          | 2313   | 1.48   |
| 2 | 2.539          | 2356   | 1.51   |
| 3 | 3.119          | 408    | 0.26   |
| 4 | 3.841          | 150881 | 96.74  |

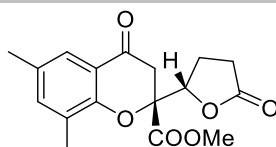

**3I**

**3I methyl (R)-6,8-dimethyl-4-oxo-2-((S)-5-oxotetrahydrofuran-2-yl)chromane-2-carboxylate**

Following the typical procedure, colourless oil **3I** was isolated in 48% yield (18.3 mg) and >99% ee/95% ee, 3:1 dr.  $[\alpha]^{25}_D = 34.3$  ( $c = 0.254$  in  $\text{CHCl}_3$ ).

**UPC<sup>2</sup>** (chiral AD-3 column),  $\text{CO}_2/\text{MeOH} = 96/4$ , flow rate 1.5 mL/min,  $\lambda = 254$  nm, retention time: (major isomer)  $t_1 = 8.3$  min,  $t_2 = 13.8$  min; (minor isomer)  $t_1 = 6.2$  min,  $t_2 = 11.1$  min.

**<sup>1</sup>H NMR** (400 MHz, Chloroform-*d*).  $\delta$  7.48 (s, 1H), 7.23 (s, 1H), 4.91 (dd,  $J = 5.6, 2.8$  Hz, 1H), 3.69 (d,  $J = 3.1$  Hz, 3H), 3.23 – 2.86 (m, 2H), 2.86 – 2.67 (m, 1H), 2.77 – 2.41 (m, 4H), 2.27 (s, 3H), 2.25 (s, 3H).

**<sup>13</sup>C NMR** (100 MHz,  $\text{CDCl}_3$ ).  $\delta$  163.9, 149.5, 148.1, 146.7, 126.5, 124.5, 79.8, 63.5, 27.6, 26.0, 21.0, 19.8, 19.0.

**ESI-HRMS**: calcd for  $\text{C}_{17}\text{H}_{18}\text{O}_6\text{Na}^+$  ( $[\text{M} + \text{Na}]^+$ ) = 341.0996, found 341.0992.

**IR** (neat): 2922, 1786, 1757, 1690, 1612, 1476, 1266, 1176, 1063, 1040  $\text{cm}^{-1}$ .

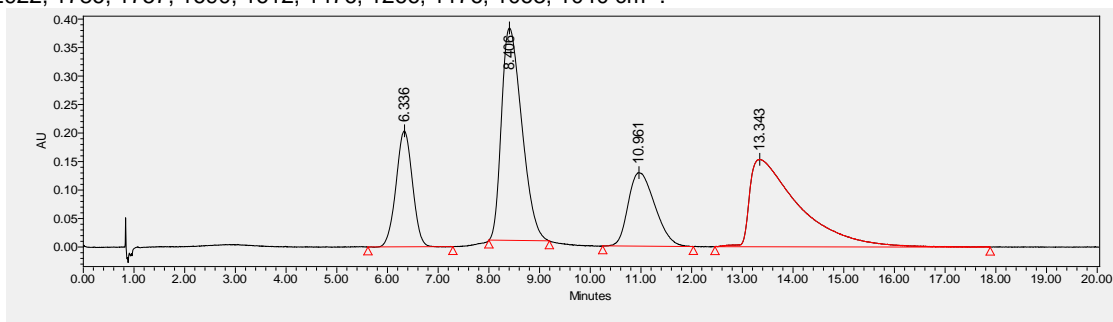

|   | Retention Time | Area     | % Area |
|---|----------------|----------|--------|
| 1 | 6.336          | 4571768  | 15.24  |
| 2 | 8.406          | 10385845 | 34.62  |
| 3 | 10.961         | 4708689  | 15.70  |
| 4 | 13.343         | 10333882 | 34.45  |

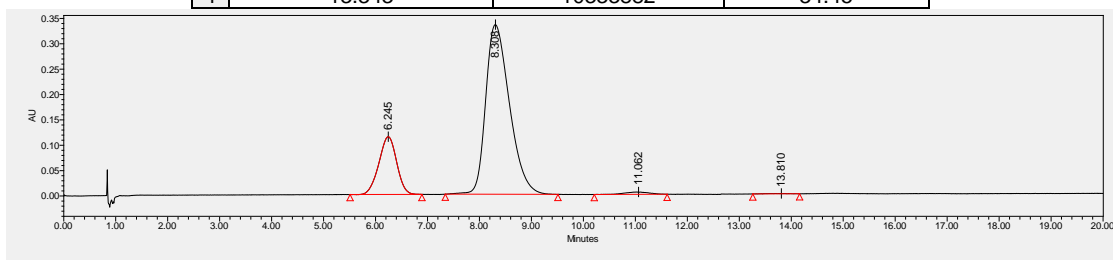

|   | Retention Time | Area     | % Area |
|---|----------------|----------|--------|
| 1 | 6.245          | 2709713  | 20.07  |
| 2 | 8.308          | 10623626 | 78.67  |
| 3 | 11.062         | 151724   | 1.12   |
| 4 | 13.810         | 18274    | 0.14   |

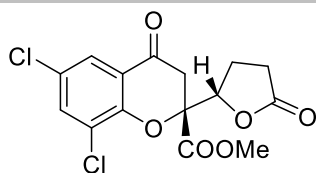

**3m**

**3m: methyl (R)-6,8-dichloro-4-oxo-2-((S)-5-oxotetrahydrofuran-2-yl)chromane-2-carboxylate**

Following the typical procedure, colourless oil **3m** was isolated in 65% yield (22.8 mg) and 96% ee/80% ee, 1.1:1 dr.  $[\alpha]_D^{25} = -1.0$  ( $c = 0.20$  in  $\text{CHCl}_3$ ).

**UPC<sup>2</sup>** (chiral AS-3 column),  $\text{CO}_2/\text{MeOH} = 95/5$ , flow rate 1.5 mL/min,  $\lambda = 254$  nm, retention time: (major isomer)  $t_1 = 5.0$  min,  $t_2 = 6.7$  min; (minor isomer)  $t_1 = 2.7$  min,  $t_2 = 3.1$  min.

**<sup>1</sup>H NMR** (400 MHz, Chloroform-*d*).  $\delta$  8.49 (d,  $J = 5.0$  Hz, 1H), 7.83 (s, 1H), 7.14 (d,  $J = 5.8$  Hz, 1H), 4.95 (t,  $J = 4.4$  Hz, 1H), 4.19 – 3.75 (d,  $J = 2.8$  Hz, 3H), 3.51 – 2.93 (m, 3H), 2.66 – 2.38 (m, 3H).

**<sup>13</sup>C NMR** (100 MHz,  $\text{CDCl}_3$ ).  $\delta$  186.2, 175.6, 168.4, 154.2, 136.3, 127.8, 124.8, 124.4, 121.9, 86.5, 90.4, 53.9, 40.1, 27.5, 22.2.

**ESI-HRMS**: calcd for  $\text{C}_{15}\text{H}_{12}\text{Cl}_2\text{O}_6\text{Na}^+$  ( $[\text{M} + \text{Na}]^+$ ) = 380.9903 and 382.9874, found 380.9898 and 382.9868.

**IR** (neat): 2923, 1787, 1755, 1703, 1592, 1455, 1262, 1239, 1177, 1065, 1038, 879, 818, 758  $\text{cm}^{-1}$ .

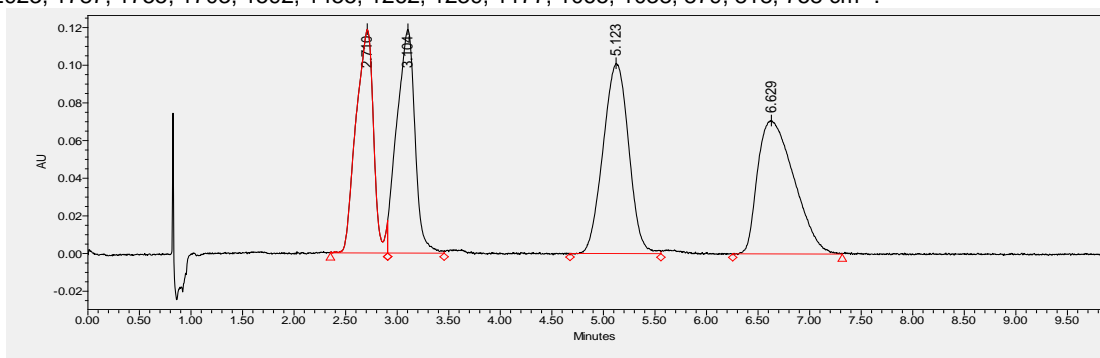

|   | Retention Time | Area    | % Area |
|---|----------------|---------|--------|
| 1 | 2.710          | 1397893 | 22.12  |
| 2 | 3.104          | 1442069 | 22.82  |
| 3 | 5.123          | 1741740 | 27.56  |
| 4 | 6.629          | 1737063 | 27.49  |

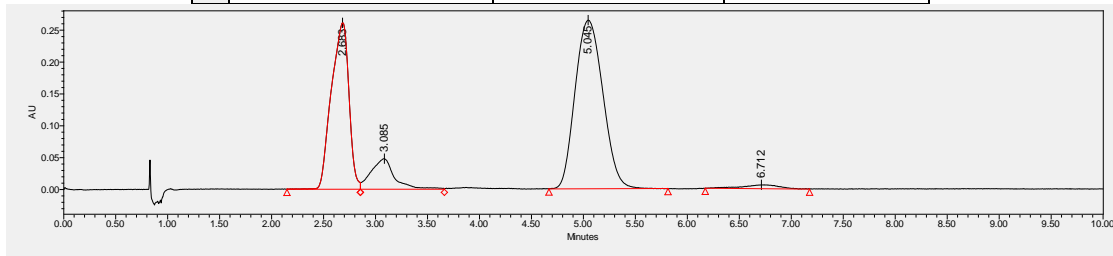

|   | Retention Time | Area    | % Area |
|---|----------------|---------|--------|
| 1 | 2.683          | 3065564 | 34.48  |
| 2 | 3.085          | 753282  | 8.47   |
| 3 | 5.045          | 4919926 | 55.33  |
| 4 | 6.712          | 153361  | 1.72   |



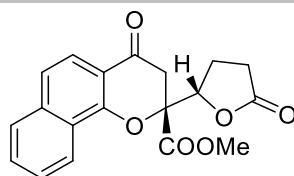

**3n**

**3n: methyl (R)-4-oxo-2-((S)-5-oxotetrahydrofuran-2-yl)-3,4-dihydro-2H-benzo[h]chromene-2-carboxylate**

Following the typical procedure, colourless oil **3n** was isolated in 72% yield (24.4 mg) and >99% ee/84% ee, 12:1 dr.  $[\alpha]_D^{25} = -35.5$  ( $c = 0.442$  in  $\text{CHCl}_3$ ). M.p. = 148.1-150.2 °C

**UPC<sup>2</sup>** (chiral AD-3 column),  $\text{CO}_2/\text{MeOH} = 95/5$ , flow rate 1.5 mL/min,  $\lambda = 254$  nm, retention time: (major isomer)  $t_1 = 7.0$  min,  $t_2 = 10.4$  min; (minor isomer)  $t_1 = 5.3$  min,  $t_2 = 8.4$  min.

**<sup>1</sup>H NMR** (400 MHz, Chloroform-*d*)  $\delta$  8.25 (d,  $J = 8.3$  Hz, 1H), 7.81 (dd,  $J = 8.5, 2.8$  Hz, 2H), 7.73 – 7.63 (m, 1H), 7.64 – 7.56 (m, 1H), 7.46 (d,  $J = 8.7$  Hz, 1H), 5.03 (dd,  $J = 8.2, 5.1$  Hz, 1H), 3.66 (s, 3H), 3.35 – 3.00 (m, 2H), 2.91 – 2.41 (m, 4H).

**<sup>13</sup>C NMR** (101 MHz, Chloroform-*d*)  $\delta$  187.5, 175.8, 169.0, 158.0, 137.8, 130.2, 127.9, 127.0, 124.3, 123.4, 122.2, 121.0, 115.2, 85.5, 81.2, 53.6, 53.6, 39.7, 27.7, 22.1.

**ESI-HRMS**: calcd for  $\text{C}_{19}\text{H}_{16}\text{O}_6\text{Na}^+$  ( $[\text{M} + \text{Na}]^+$ ) = 363.0839, found 363.0834.

**IR** (neat): 2924, 1786, 1758, 1682, 1626, 1598, 1575, 1509, 1438, 1351, 1283, 1257, 1198, 1132, 1096, 1069, 1038, 943, 815, 751  $\text{cm}^{-1}$ .

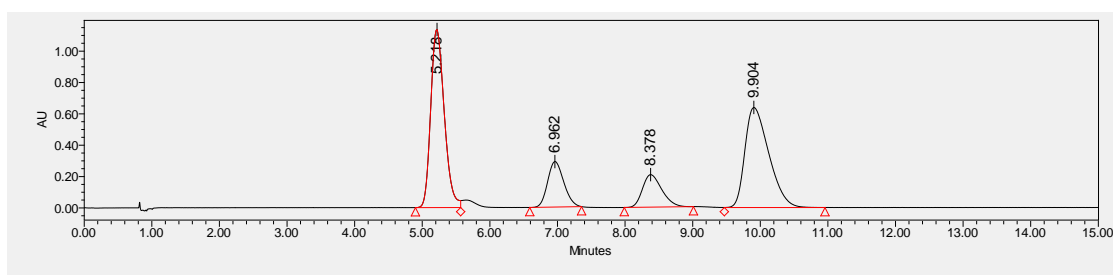

|   | Retention Time | Area     | % Area |
|---|----------------|----------|--------|
| 1 | 5.218          | 15797930 | 39.12  |
| 2 | 6.962          | 4808536  | 11.91  |
| 3 | 8.378          | 4120037  | 10.20  |
| 4 | 9.904          | 15658580 | 38.77  |

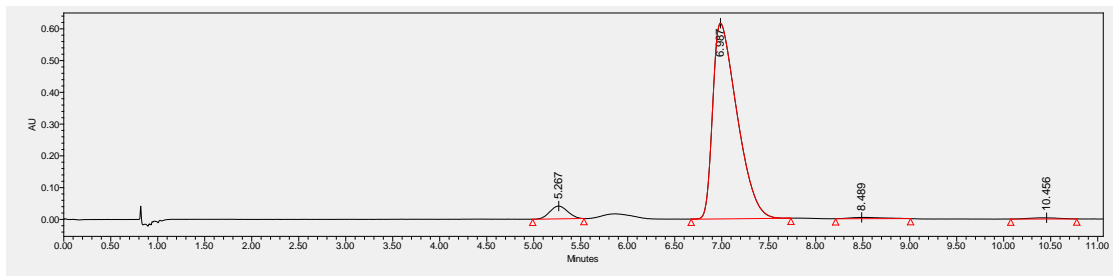

|   | Retention Time | Area     | % Area |
|---|----------------|----------|--------|
| 1 | 5.267          | 532038   | 4.51   |
| 2 | 6.987          | 11070665 | 93.91  |
| 3 | 8.489          | 104364   | 0.89   |
| 4 | 10.456         | 81396    | 0.69   |

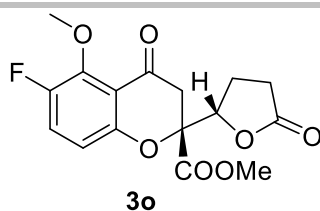

**3o: methyl (R)-4-oxo-2-((S)-5-oxotetrahydrofuran-2-yl)chromane-2-carboxylate**

Following the typical procedure, colourless oil **3o** was isolated in 48% yield (14.7 mg) and 99% ee/95% ee, 12:1 dr.  $[\alpha]_D^{25} = 52.6$  ( $c = 0.268$  in  $\text{CHCl}_3$ ).

**UPC<sup>2</sup>** (chiral AD-3 column),  $\text{CO}_2/\text{MeOH} = 90/10$ , flow rate 1.5 mL/min,  $\lambda = 254$  nm, retention time: (major isomer)  $t_1 = 3.0$  min,  $t_2 = 5.4$  min; (minor isomer)  $t_1 = 2.4$  min,  $t_2 = 3.4$  min.

**<sup>1</sup>H NMR** (400 MHz,  $\text{Chloroform-}d$ ).  $\delta$  7.36 – 7.21 (m, 2H), 6.79 (dd,  $J = 9.2, 3.7$  Hz, 1H), 4.88 (dd,  $J = 7.8, 6.0$  Hz, 1H), 3.98 (d,  $J = 2.1$  Hz, 3H), 3.73 (s, 3H), 3.15 – 2.84 (m, 2H), 2.82 – 2.54 (m, 2H), 2.43 (tdd,  $J = 13.3, 11.0, 6.3$  Hz, 2H).

**<sup>13</sup>C NMR** (100 MHz,  $\text{CDCl}_3$ ).  $\delta$  186.3, 175.6, 168.8, 156.3 (d  $J = 2.1$  Hz), 151.7 (d  $J = 241.1$  Hz), 147.3 (d  $J = 12.0$  Hz), 124.1 (d  $J = 22.1$  Hz), 115.2, 112.6, 84.2, 81.0, 62.0, 53.6, 41.3, 27.7, 22.0.

**<sup>19</sup>F NMR** (376 MHz,  $\text{CDCl}_3$ )  $\delta$  -137.57.

**ESI-HRMS**: calcd for  $\text{C}_{16}\text{H}_{15}\text{FO}_6\text{Na}^+$  ( $[\text{M} + \text{Na}]^+$ ) = 361.0694, found 361.0688.

**IR** (neat): 2922, 1784, 1695, 1613, 1479, 1413, 1266, 1194, 1060, 1038, 941, 820  $\text{cm}^{-1}$ .

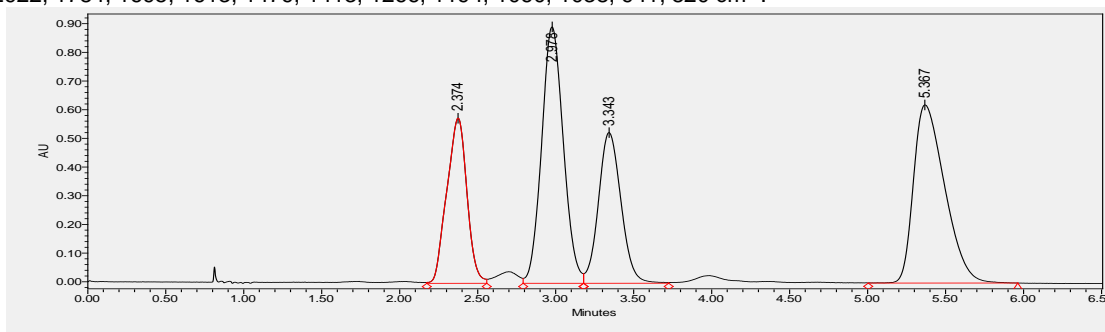

|   | Retention Time | Area    | % Area |
|---|----------------|---------|--------|
| 1 | 2.374          | 5153119 | 18.58  |
| 2 | 2.978          | 8669811 | 31.26  |
| 3 | 3.343          | 5277378 | 19.03  |
| 4 | 5.367          | 8637219 | 31.14  |

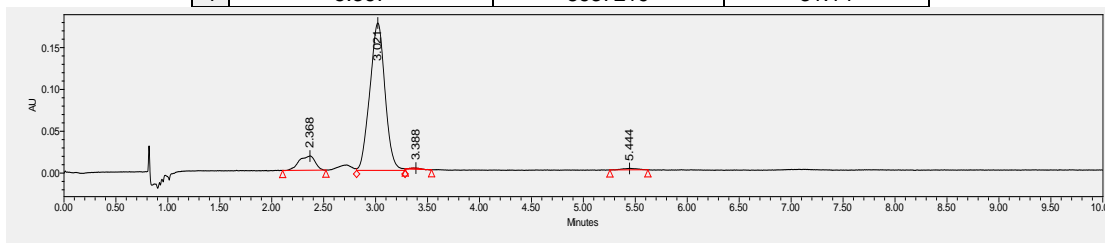

|   | Retention Time | Area    | % Area |
|---|----------------|---------|--------|
| 1 | 2.368          | 183528  | 9.20   |
| 2 | 3.021          | 1784765 | 89.50  |
| 3 | 3.388          | 9350    | 0.47   |
| 4 | 5.444          | 16531   | 0.83   |

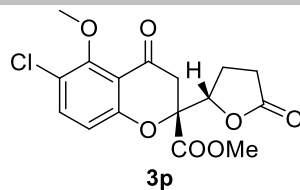

**3p: methyl (R)-6-bromo-5-methoxy-4-oxo-2-((S)-5-oxotetrahydrofuran-2-yl)chromane-2-carboxylate**

Following the typical procedure, colourless oil **3p** was isolated in 36% yield (12.7 mg) and 98% ee/94% ee, 5:1 dr.  $[\alpha]_D^{25} = 20.6$  ( $c = 0.248$  in  $\text{CHCl}_3$ ).

**UPC<sup>2</sup>** (chiral AS-3 column),  $\text{CO}_2/\text{MeOH} = 95/5$ , flow rate 1.5 mL/min,  $\lambda = 254$  nm, retention time: (major isomer)  $t_1 = 4.3$  min,  $t_2 = 6.4$  min; (minor isomer)  $t_1 = 3.0$  min,  $t_2 = 3.4$  min.

**<sup>1</sup>H NMR** (600 MHz, Chloroform-*d*)  $\delta$  7.52 (d,  $J = 9.2$  Hz, 1H), 6.85 (dd,  $J = 33.2, 9.0$  Hz, 1H), 4.96 – 4.86 (m, 1H), 3.88 (s, 3H), 3.74 (s, 3H), 3.12 – 2.89 (m, 2H), 2.85 – 2.55 (m, 2H), 2.51 – 2.38 (m, 2H).

**<sup>13</sup>C NMR** (151 MHz, Chloroform-*d*)  $\delta$  175.5, 168.6, 159.3, 155.9, 136.8, 122.6, 116.0, 114.7, 114.5, 84.3, 80.8, 53.7, 61.6, 41.1, 27.7, 22.0.

**ESI-HRMS**: calcd for  $\text{C}_{16}\text{H}_{15}\text{ClO}_6\text{Na}^+$  ( $[\text{M} + \text{Na}]^+$ ) = 377.0399 and 379.0369, found 377.0394 and 379.0363.

**IR** (neat): 2921, 2851, 1786, 1756, 1697, 1592, 1462, 1442, 1399, 1319, 1198, 1132, 1508, 1035, 818, 766  $\text{cm}^{-1}$ .

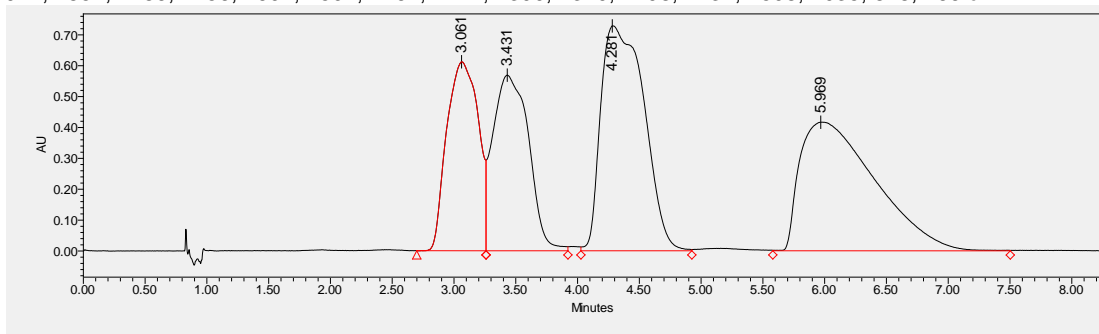

|   | Retention Time | Area     | % Area |
|---|----------------|----------|--------|
| 1 | 3.061          | 10844636 | 18.81  |
| 2 | 3.431          | 11437420 | 19.83  |
| 3 | 4.281          | 17722649 | 30.73  |
| 4 | 5.969          | 17659168 | 30.62  |

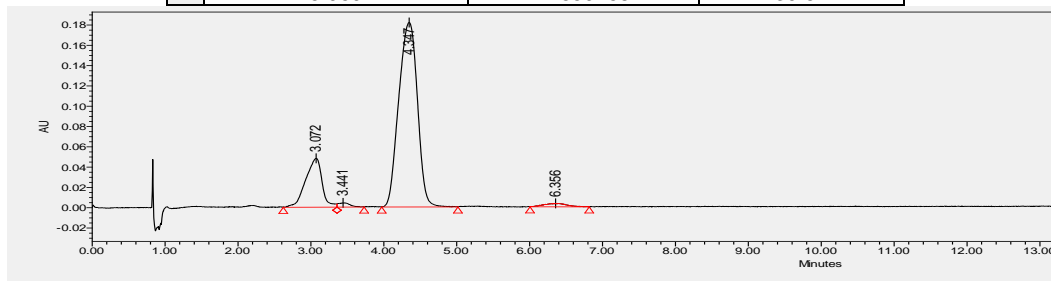

|   | Retention Time | Area    | % Area |
|---|----------------|---------|--------|
| 1 | 3.072          | 750697  | 18.27  |
| 2 | 3.441          | 46964   | 1.14   |
| 3 | 4.347          | 3235834 | 78.75  |
| 4 | 6.356          | 75287   | 1.83   |

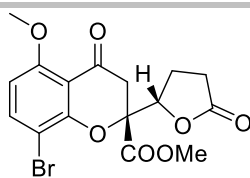

**3q**

**3q: methyl (R)-8-bromo-5-methoxy-4-oxo-2-((S)-5-oxotetrahydrofuran-2-yl)chromane-2-carboxylate**

Following the typical procedure, colourless oil **3q** was isolated in 59% yield (23.3 mg) and >99% ee, >19:1 dr.  $[\alpha]_D^{25} = 37.0$  ( $c = 0.30$  in  $\text{CHCl}_3$ ). M.p. = 148.1-150.2 °C

**UPC<sup>2</sup>** (chiral IC-3 column),  $\text{CO}_2/\text{MeOH} = 93/7$ , flow rate 1.5 mL/min,  $\lambda = 254$  nm, retention time: (major isomer)  $t_1 = 6.5$  min,  $t_2 = 3.8$  min; (minor isomer)  $t_1 = 4.2$  min,  $t_2 = 3.5$  min.

**<sup>1</sup>H NMR** (400 MHz, Chloroform-*d*)  $\delta$  7.67 (d,  $J = 9.0$  Hz, 1H), 6.52 (d,  $J = 9.0$  Hz, 1H), 4.92 (dd,  $J = 7.2, 4.7$  Hz, 1H), 3.90 (s, 3H), 3.72 (s, 3H), 3.17 – 2.83 (m, 3H), 2.67 – 2.40 (m, 3H).

**<sup>13</sup>C NMR** (101 MHz, Chloroform-*d*)  $\delta$  185.8, 168.3, 159.8, 157.3, 139.5, 111.8, 106.0, 102.2, 85.4, 80.8, 56.4, 53.6, 41.5, 27.6, 22.0.

**ESI-HRMS**: calcd for  $\text{C}_{16}\text{H}_{15}\text{BrO}_6\text{Na}^+$  ( $[\text{M} + \text{Na}]^+$ ) = 420.9893 and 422.9873, found 420.9889 and 422.9867.

**IR** (neat): 2923, 1784, 1768, 1690, 1589, 1565, 1473, 1407, 1317, 1251, 1184, 1117, 1049, 836, 805, 753  $\text{cm}^{-1}$ .

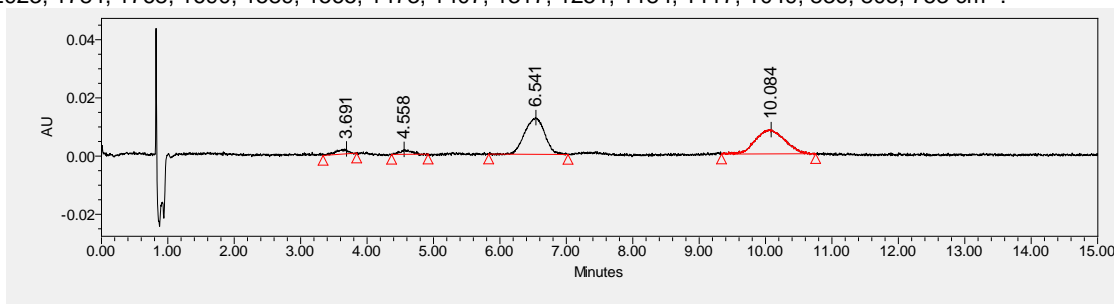

|   | Retention Time | Area   | % Area |
|---|----------------|--------|--------|
| 1 | 3.691          | 20661  | 3.69   |
| 2 | 4.558          | 19317  | 3.45   |
| 3 | 6.541          | 264164 | 47.16  |
| 4 | 10.084         | 255960 | 45.70  |

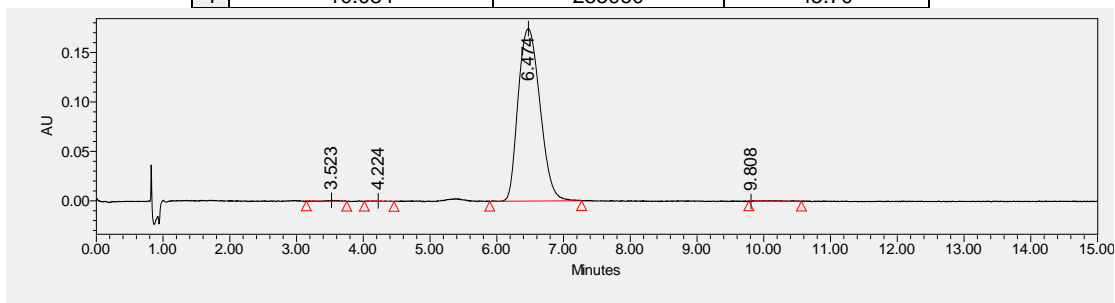

|   | Retention Time | Area    | % Area |
|---|----------------|---------|--------|
| 1 | 3.523          | 12100   | 0.30   |
| 2 | 4.224          | 5151    | 0.13   |
| 3 | 6.474          | 3961999 | 99.36  |
| 4 | 9.808          | 8178    | 0.21   |

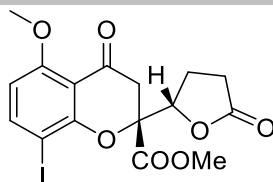

**3r**

**3r: methyl (R)-8-iodo-5-methoxy-4-oxo-2-((S)-5-oxotetrahydrofuran-2-yl)chromane-2-carboxylate**

Following the typical procedure, colourless oil **3r** was isolated in 69% yield (30.7 mg) and >99% ee, >19:1 dr.  $[\alpha]^{25}_D = 34.3$  ( $c = 0.51$  in  $\text{CHCl}_3$ ). M.p. = 148.1-150.2 °C

**UPC<sup>2</sup>** (chiral AS-3 column),  $\text{CO}_2/\text{MeOH} = 93/7$ , flow rate 1.5 mL/min,  $\lambda = 254$  nm, retention time: (major isomer)  $t_1 = 16.1$  min,  $t_2 = 19.4$  min; (minor isomer)  $t_1 = 13.6$  min,  $t_2 = 18.1$  min.

**<sup>1</sup>H NMR** (400 MHz, Chloroform-*d*)  $\delta$  7.87 (d,  $J = 8.9$  Hz, 1H), 6.45 (d,  $J = 8.9$  Hz, 1H), 4.92 (dd,  $J = 8.0, 4.3$  Hz, 1H), 3.90 (s, 3H), 3.72 (s, 3H), 3.18 – 2.86 (m, 3H), 2.65 – 2.41 (m, 3H).

**<sup>13</sup>C NMR** (101 MHz, Chloroform-*d*)  $\delta$  186.0, 175.8, 168.3, 160.8, 159.6, 145.5, 111.6, 107.3, 85.4, 80.8, 74.2, 56.4, 53.6, 41.4, 27.9, 21.9.

**ESI-HRMS**: calcd for  $\text{C}_{16}\text{H}_{16}\text{IO}_6^+$  ( $[\text{M} + \text{H}]^+$ ) = 446.9939, found 446.9925.

**IR** (neat): 2923, 2852, 1781, 1757, 1687, 1582, 1558, 1469, 1436, 1400, 1306, 1253, 1182, 1117, 1094, 1049, 803, 734  $\text{cm}^{-1}$ .

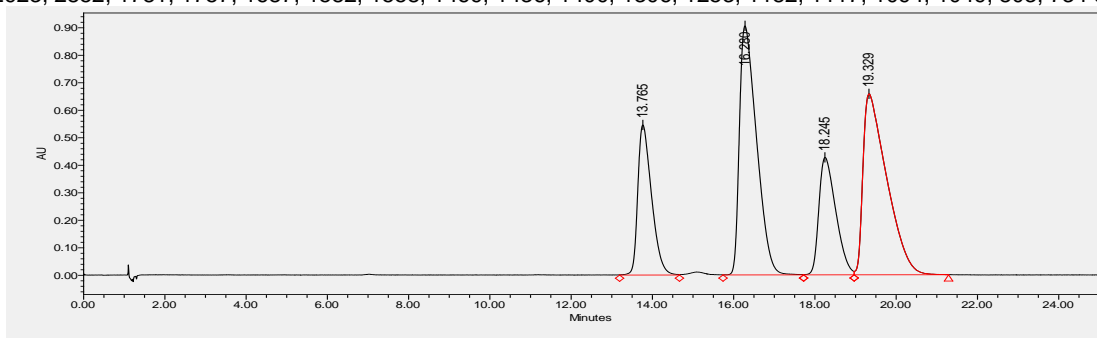

|   | Retention Time | Area     | % Area |
|---|----------------|----------|--------|
| 1 | 13.765         | 12842818 | 16.38  |
| 2 | 16.280         | 26541284 | 33.85  |
| 3 | 18.245         | 12327924 | 15.72  |
| 4 | 19.329         | 26699445 | 34.05  |

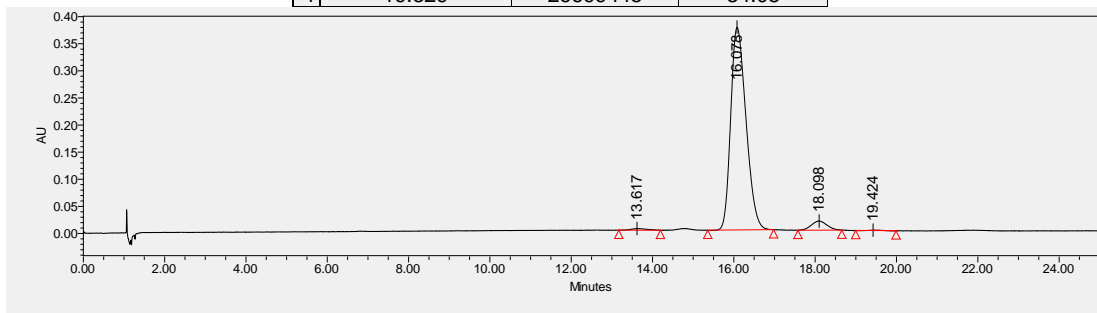

|   | Retention Time | Area    | % Area |
|---|----------------|---------|--------|
| 1 | 13.617         | 78360   | 0.76   |
| 2 | 16.078         | 9739434 | 94.73  |
| 3 | 18.098         | 445324  | 4.33   |
| 4 | 19.424         | 17978   | 0.17   |

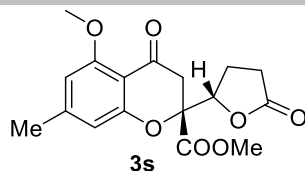

**3s: methyl (R)-5-methoxy-7-methyl-4-oxo-2-((S)-5-oxotetrahydrofuran-2-yl)chromane-2-carboxylate**

Following the typical procedure, colourless oil **3s** was isolated in 32% yield (10.7 mg) and >99% ee, >19:1 dr.  $[\alpha]_D^{25} = 25.6$  ( $c = 0.164$  in  $\text{CHCl}_3$ ). M.p. = 170.3-174.2 °C

**UPC<sup>2</sup>** (chiral IA-3 column),  $\text{CO}_2/\text{MeOH} = 93/7$ , flow rate 1.5 mL/min,  $\lambda = 254$  nm, retention time: (major isomer)  $t_1 = 9.2$  min,  $t_2 = 14.3$  min.

**<sup>1</sup>H NMR** (600 MHz, Chloroform-*d*)  $\delta$  6.54 (s, 1H), 6.37 (s, 1H), 4.86 (dd,  $J = 8.1, 5.5$  Hz, 1H), 3.89 (s, 3H), 3.71 (s, 3H), 3.09 – 2.81 (m, 2H), 2.66 (dddd,  $J = 84.2, 17.9, 10.2, 6.6$  Hz, 2H), 2.51 – 2.37 (m, 2H), 2.35 (s, 3H).

**<sup>13</sup>C NMR** (100 MHz,  $\text{CDCl}_3$ )  $\delta$  186.1, 175.8, 169.0, 161.2, 160.4, 148.8, 110.6, 105.9, 83.9, 81.13, 56.2, 53.5, 41.3, 27.7, 22.6, 22.0.

**ESI-HRMS**: calcd for  $\text{C}_{17}\text{H}_{18}\text{O}_7\text{Na}^+$  ( $[\text{M} + \text{Na}]^+$ ) = 337.0945, found 337.0938.

**IR** (neat): 2921, 1785, 1739, 1681, 1656, 1616, 1566, 1464, 1348, 1259, 1225, 1196, 1071, 1051, 833, 753  $\text{cm}^{-1}$ .

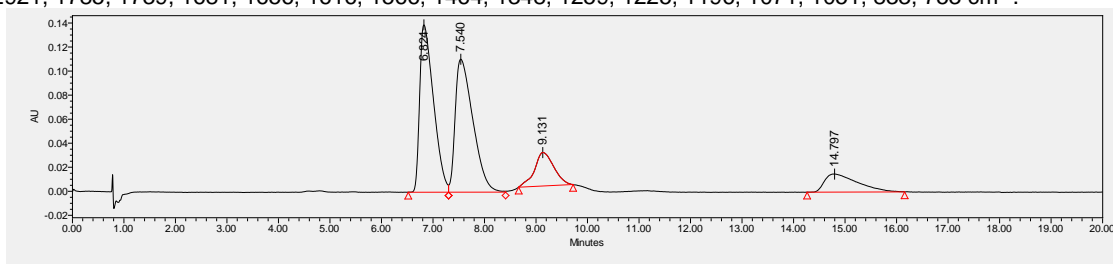

|   | Retention Time | Area    | % Area |
|---|----------------|---------|--------|
| 1 | 6.824          | 2593406 | 39.06  |
| 2 | 7.540          | 2645287 | 39.84  |
| 3 | 9.131          | 728688  | 10.98  |
| 4 | 14.797         | 671574  | 10.12  |

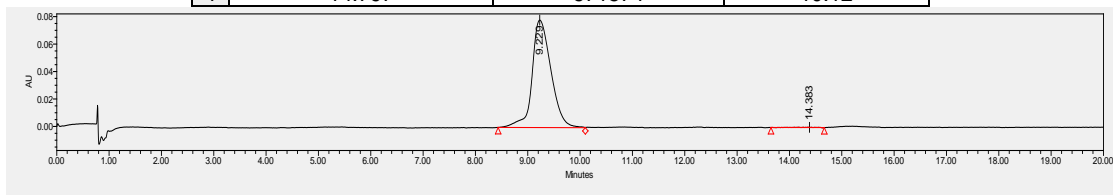

|   | Retention Time | Area    | % Area |
|---|----------------|---------|--------|
| 1 | 9.229          | 1962482 | 99.76  |
| 2 | 14.383         | 4705    | 0.24   |

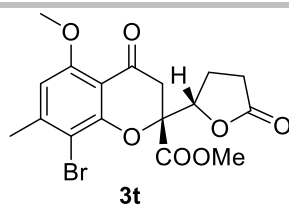

**3t: methyl (R)-8-bromo-5-methoxy-7-methyl-4-oxo-2-((S)-5-oxotetrahydrofuran-2-yl)chromane-2-carboxylate**

Following the typical procedure, colourless oil **3t** was isolated in 68% yield (27.8 mg) and >99% ee, >19:1 dr.  $[\alpha]^{25}_D = 5.8$  ( $c = 0.204$  in  $\text{CHCl}_3$ ). M.p. = 143.2-145.7 °C

**UPC<sup>2</sup>** (chiral AS-3 column),  $\text{CO}_2/\text{MeOH} = 93/7$ , flow rate 1.5 mL/min,  $\lambda = 254$  nm, retention time: (major isomer)  $t_1 = 6.3$  min,  $t_2 = 9.3$  min; (minor isomer)  $t_1 = 3.5$  min,  $t_2 = 4.2$  min.

**<sup>1</sup>H NMR** (400 MHz, Chloroform-*d*).  $\delta$  6.51 (s, 1H), 4.91 (dd,  $J = 7.6, 4.3$  Hz, 1H), 3.89 (s, 3H), 3.72 (s, 3H), 3.16 – 2.85 (m, 3H), 2.65 – 2.38 (m, 6H).

**<sup>13</sup>C NMR** (100 MHz,  $\text{CDCl}_3$ ).  $\delta$  185.7, 175.9, 168.4, 159.0, 157.3, 148.1, 109.8, 107.2, 104.9, 85.4, 81.2, 56.3, 53.6, 41.3, 27.6, 24.5, 22.1.

**ESI-HRMS**: calcd for  $\text{C}_{17}\text{H}_{17}\text{BrO}_7\text{Na}^+$  ( $[\text{M} + \text{Na}]^+$ ) = 435.0050 and 437.0029, found 435.0047 and 437.0020.

**IR** (neat): 2922, 1784, 1686, 1598, 1547, 1464, 1392, 1343, 1258, 1131, 1076, 1053, 821, 752  $\text{cm}^{-1}$ .

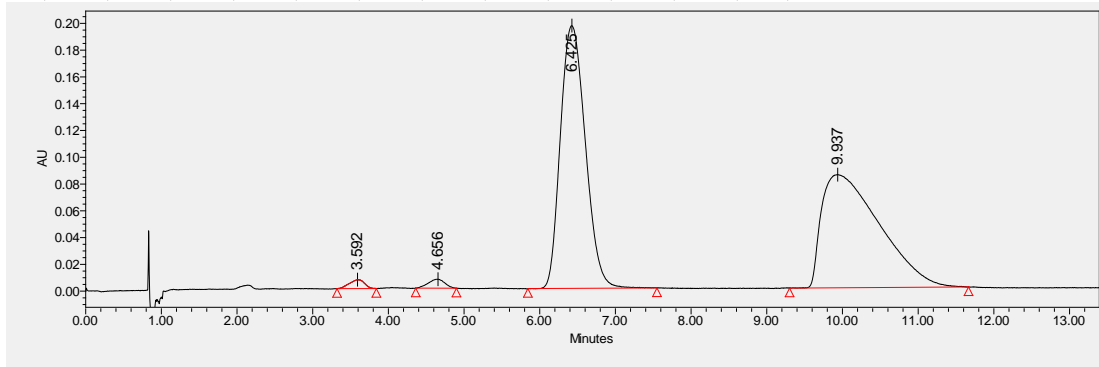

|   | Retention Time | Area    | % Area |
|---|----------------|---------|--------|
| 1 | 3.592          | 91734   | 1.00   |
| 2 | 4.656          | 101088  | 1.10   |
| 3 | 6.425          | 4501214 | 48.99  |
| 4 | 9.937          | 4494571 | 48.91  |

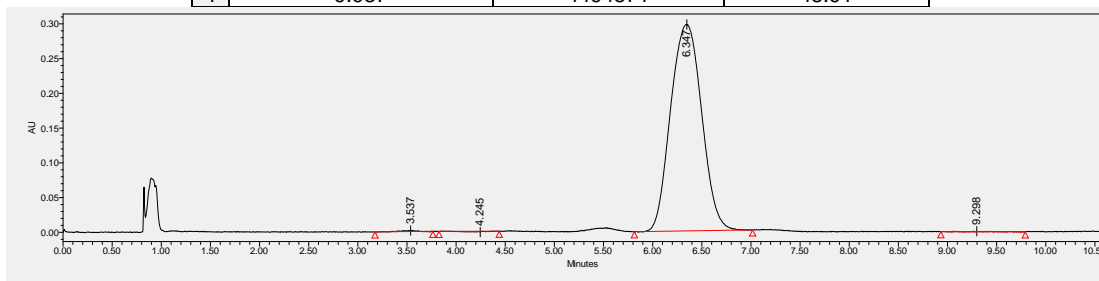

|   | Retention Time | Area    | % Area |
|---|----------------|---------|--------|
| 1 | 3.537          | 17968   | 0.27   |
| 2 | 4.245          | 13764   | 0.21   |
| 3 | 6.347          | 6527303 | 99.33  |
| 4 | 9.298          | 12003   | 0.18   |

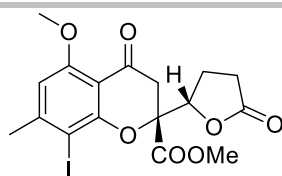

**3u**

**3u: methyl (R)-8-iodo-5-methoxy-7-methyl-4-oxo-2-((S)-5-oxotetrahydrofuran-2-yl)chromane-2-carboxylate**

Following the typical procedure, colourless oil **3u** was isolated in 69% yield (31.4 mg) and 99% ee, >19:1 dr.  $[\alpha]^{25}_D = -6.1$  ( $c = 0.62$  in  $\text{CHCl}_3$ ). M.p. = 185.1-189.2 °C

**UPC<sup>2</sup>** (chiral AD-3 column),  $\text{CO}_2/\text{MeOH} = 93/7$ , flow rate 1.5 mL/min,  $\lambda = 254$  nm, retention time: (major isomer)  $t_1 = 8.4$  min;  $t_2 = 11.1$  min; (minor isomer)  $t_1 = 6.2$  min,  $t_2 = 4.8$  min.

**<sup>1</sup>H NMR** (400 MHz, Chloroform-*d*).  $\delta$  6.58 (s, 1H), 4.91 (dd,  $J = 8.3, 4.0$  Hz, 1H), 3.89 (s, 3H), 3.71 (s, 3H), 3.19 – 2.80 (m, 3H), 2.69 – 2.41 (m, 6H).

**<sup>13</sup>C NMR** (100 MHz,  $\text{CDCl}_3$ ).  $\delta$  185.8, 175.9, 168.5, 160.2, 159.6, 151.8, 109.3, 107.1, 85.4, 81.5, 81.0, 56.3, 53.6, 41.2, 29.8, 28.0, 21.9.

**ESI-HRMS**: calcd for  $\text{C}_{17}\text{H}_{17}\text{IO}_7\text{Na}^+$  ( $[\text{M} + \text{Na}]^+$ ) = 482.9911 and 483.9945, found 482.9905 and 483.9939.

**IR** (neat): 2924, 1783, 1683, 1592, 1541, 1462, 1383, 1340, 1257, 1208, 1132, 1074, 1051, 752  $\text{cm}^{-1}$ .

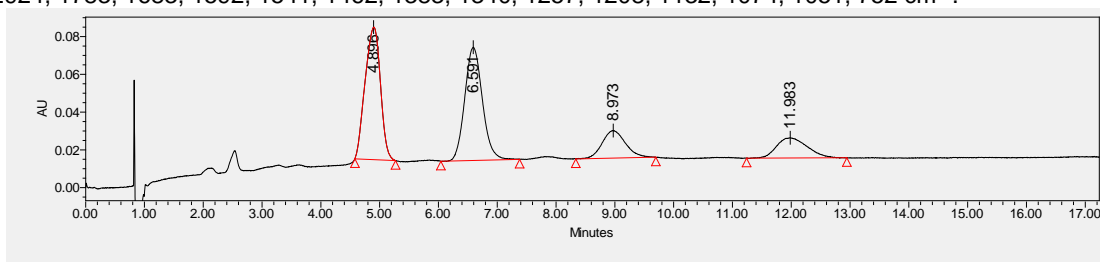

|   | Retention Time | Area    | % Area |
|---|----------------|---------|--------|
| 1 | 3.592          | 91734   | 1.00   |
| 2 | 4.656          | 101088  | 1.10   |
| 3 | 6.425          | 4501214 | 48.99  |
| 4 | 9.937          | 4494571 | 48.91  |

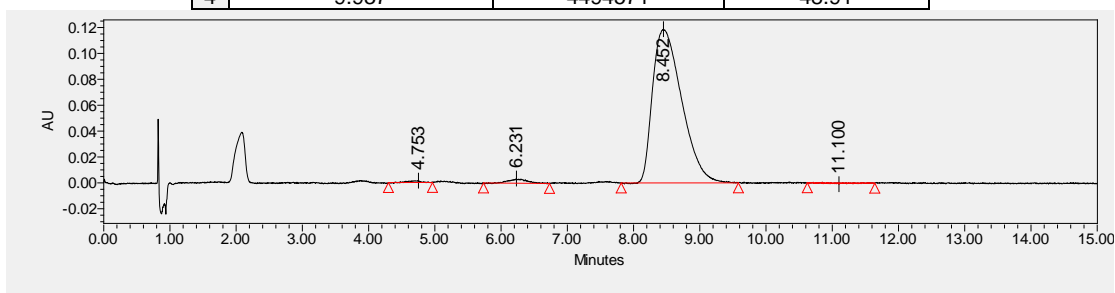

|   | Retention Time | Area    | % Area |
|---|----------------|---------|--------|
| 1 | 4.753          | 19501   | 0.52   |
| 2 | 6.231          | 64263   | 1.73   |
| 3 | 8.452          | 3627230 | 97.38  |
| 4 | 11.100         | 13940   | 0.37   |



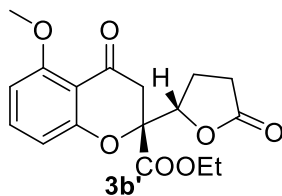

**3b': methyl (R)-8-iodo-5-methoxy-7-methyl-4-oxo-2-((S)-5-oxotetrahydrofuran-2-yl)chromane-2-carboxylate**

Following the typical procedure, colourless oil **3b'** was isolated in 38% yield (12.5 mg) >99% ee, >19:1 dr.  $[\alpha]_D^{25} = 89.6$  ( $c = 0.23$  in  $\text{CHCl}_3$ ).

**UPC<sup>2</sup>** (chiral OX-3 column),  $\text{CO}_2/\text{MeOH} = 93/7$ , flow rate 1.5 mL/min,  $\lambda = 254$  nm, retention time: (major isomer)  $t_1 = 3.5$  min,  $t_2 = 5.3$  min;

**<sup>1</sup>H NMR** (400 MHz, Chloroform-*d*).  $\delta$  7.44 (t,  $J = 8.4$  Hz, 1H), 6.70 (d,  $J = 8.3$  Hz, 1H), 6.56 (d,  $J = 8.4$  Hz, 1H), 4.88 (dd,  $J = 8.0, 5.7$  Hz, 1H), 4.28 – 4.05 (m, 2H), 3.90 (s, 3H), 3.18 – 2.81 (m, 2H), 2.81 – 2.53 (m, 2H), 2.43 (dddd,  $J = 23.3, 18.1, 13.1, 6.8$  Hz, 2H), 1.16 (t,  $J = 7.1$  Hz, 3H).

**<sup>13</sup>C NMR** (100 MHz,  $\text{CDCl}_3$ ).  $\delta$  186.5, 175.7, 168.3, 161.4, 160.5, 136.7, 110.1, 104.7, 83.9, 81.1, 62.7, 56.2, 41.5, 27.7, 13.9.

**ESI-HRMS**: calcd for  $\text{C}_{17}\text{H}_{18}\text{O}_7\text{Na}^+$  ( $[\text{M} + \text{Na}]^+$ ) = 367.0945, found 357.0938.

**IR** (neat): 2922, 1783, 1753, 1688, 1603, 1577, 1473, 1339, 1259, 1188, 1103, 1078, 1048, 791  $\text{cm}^{-1}$ .

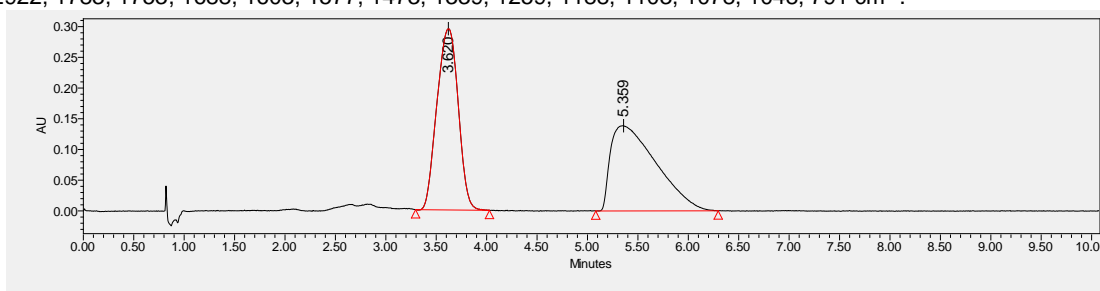

|   | Retention Time | Area    | % Area |
|---|----------------|---------|--------|
| 1 | 3.620          | 4318426 | 49.72  |
| 2 | 5.359          | 4366254 | 50.28  |

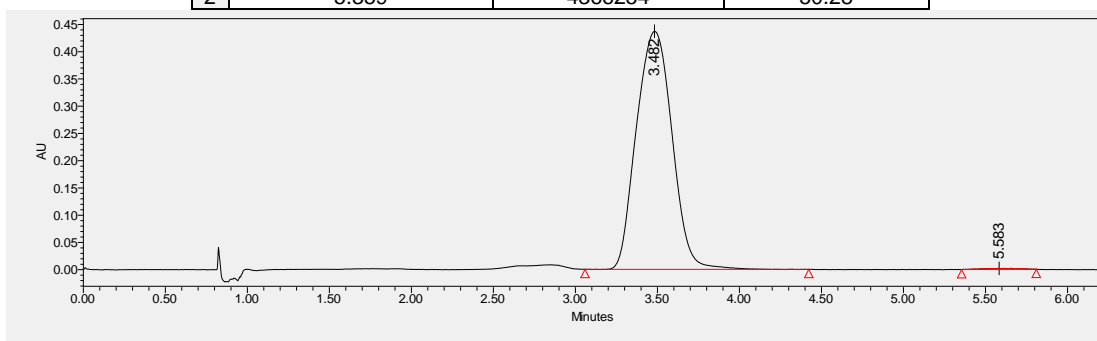

|   | Retention Time | Area    | % Area |
|---|----------------|---------|--------|
| 1 | 3.482          | 6613215 | 99.55  |
| 2 | 5.583          | 29675   | 0.45   |

## 10. References

- [1]: (a) Y. H. Wen, X. Huang, J. L. Huang, Y. Xiong, B. Qin, X. M. Feng, *Synlett* **2005**, 2445; (b) Z. P. Yu, X. H. Liu, Z. H. Dong, M. S. Xie, X. M. Feng, *Angew. Chem. Int. Ed.* **2008**, *47*, 1308; *Angew. Chem.* **2008**, *120*, 1328; (c) X. Zhou, D. J. Shang, Q. Zhang, L. L. Lin, X. H. Liu, X. M. Feng, *Org. Lett.* **2009**, *11*, 1401 and references therein.
- [2]: R. Ali, Y. Guan, A. N. Leveille, E. Vaughn, S. Parelkar, P. R. Thompson, A. E. Mattson. *Eur. J. Org. Chem.* **2019**, 6917–6929.
- [3]: J. Liu, Z. C. Li, P. Tong, Z. X. Xie, Y. Zhang, Y. Li. *J. Org. Chem.* **2015**, *80*, 1632–1643
- [4]: G. Sudhakar, S. Bayya, V. D. Kadama, J. Babu Nanubolu. *Org. Biomol. Chem.*, **2014**, *12*, 5601–5610
- [5]: Qin, T.; Johnson, R. P.; Porco, J. A., Jr. *J. Am. Chem. Soc.* **2011**, *133*, 1714–1717.
- [6]: W. Zhang, K. Krohn, Zia-Ullah, U. Flörke, G. Pescitelli, L. Di Bari, S. Antus, T. Kurtun, J. Rheinheimer, S. Draeger, B. Schulz, *Chem. Eur. J.* **2008**, *14*, 4913–4923.

# 11. Copies of NMR spectra for products.

3a

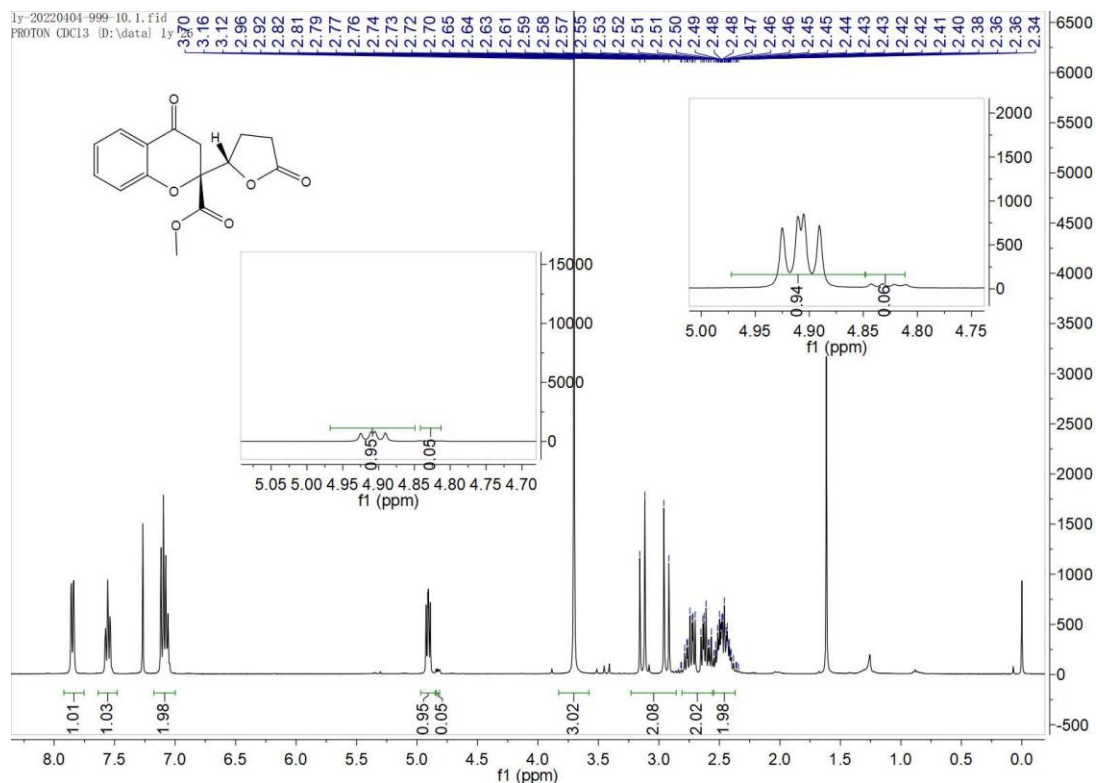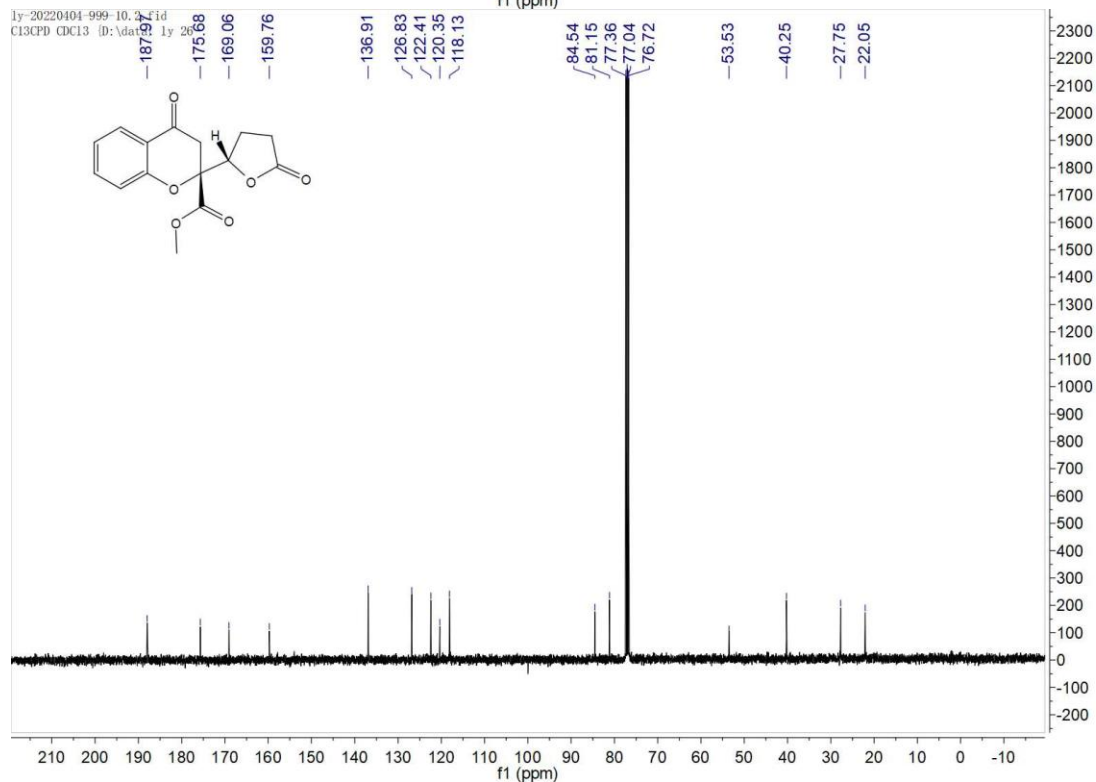

**3b**

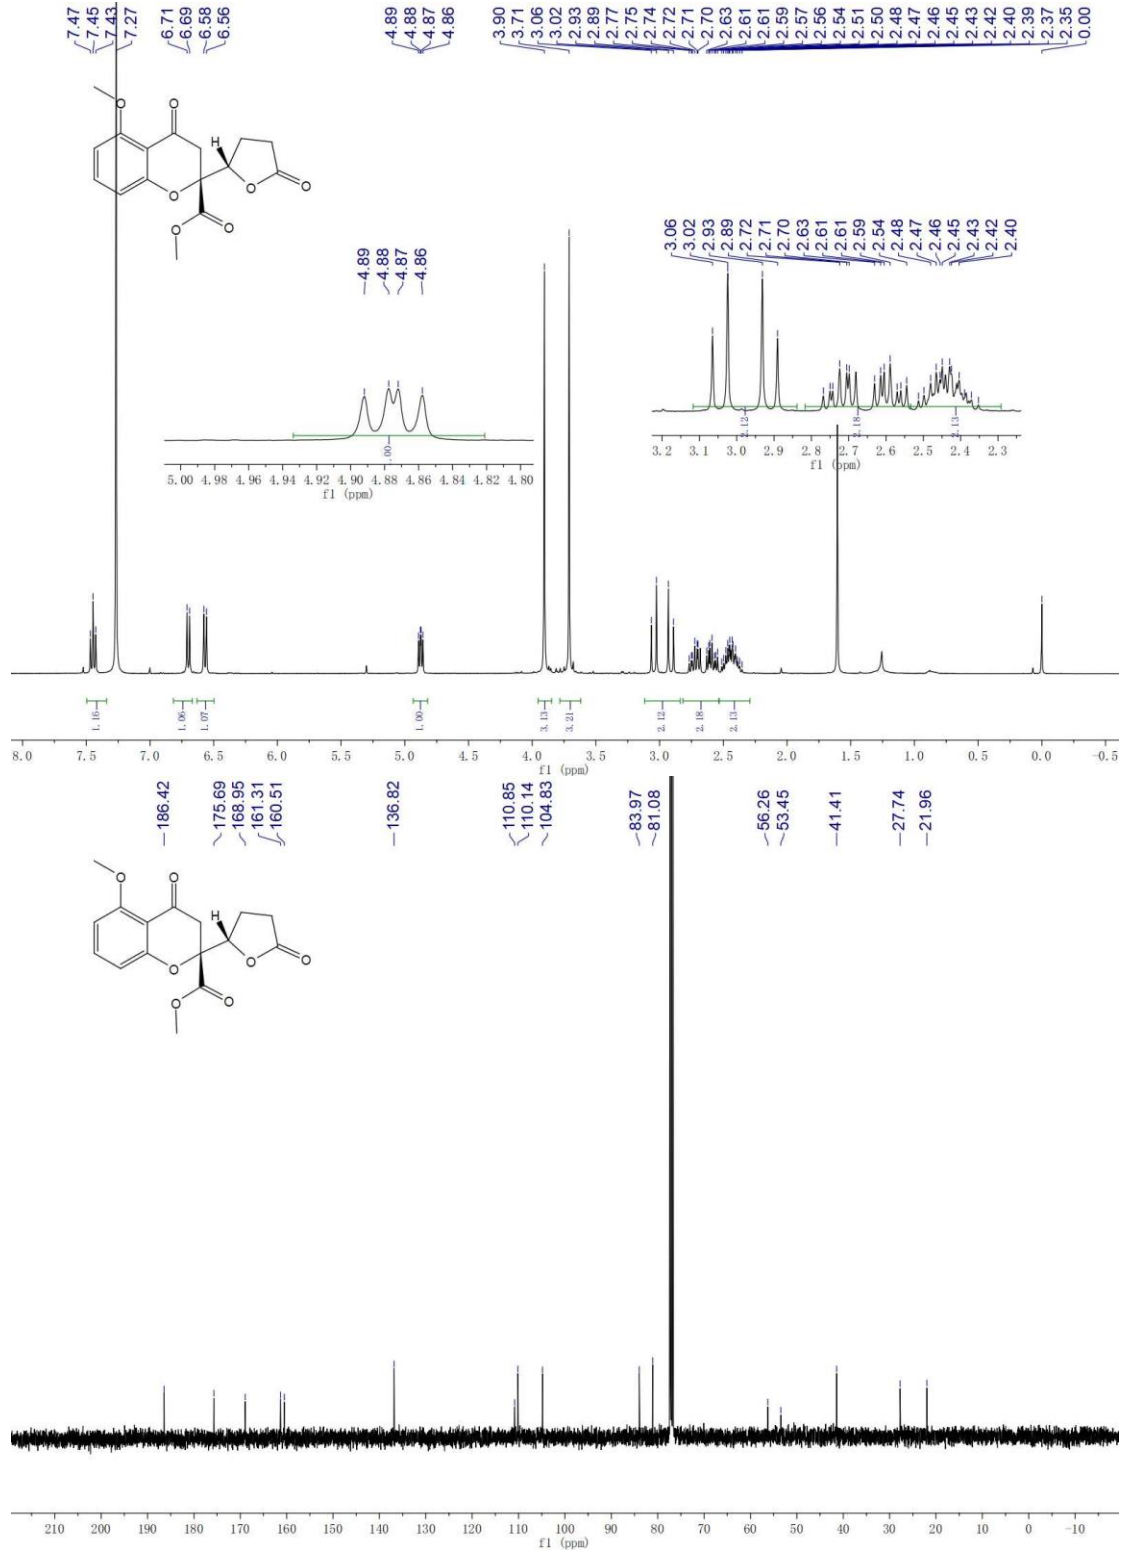

3c

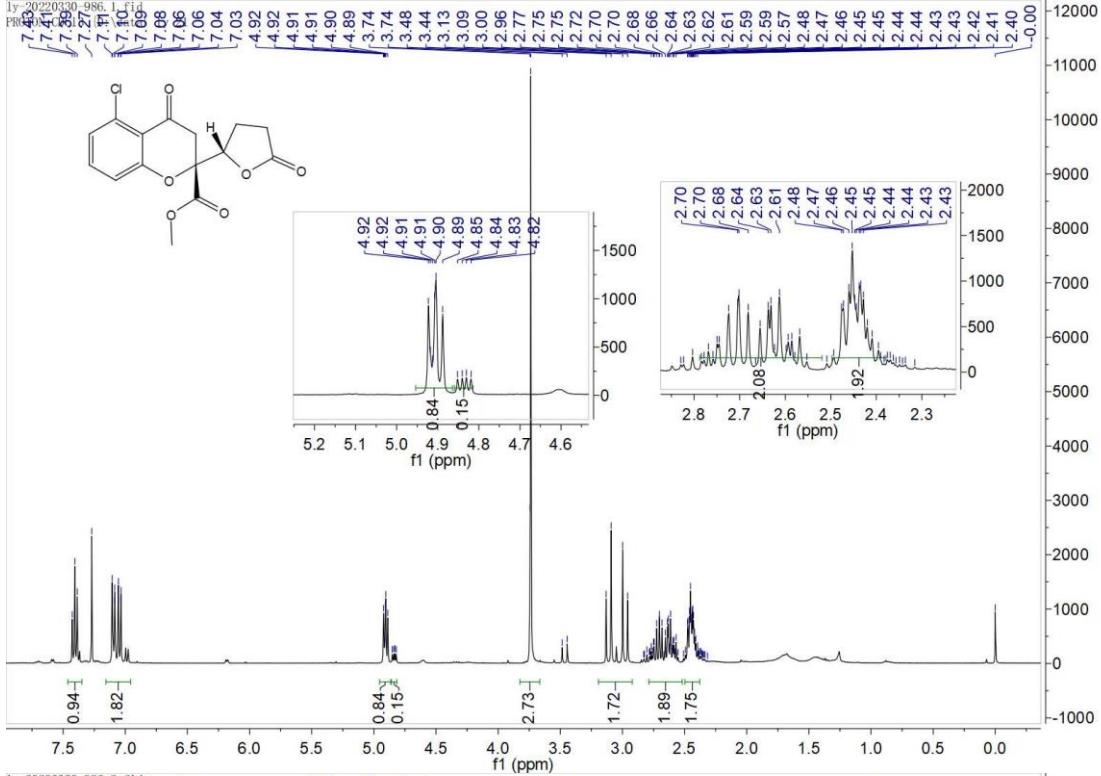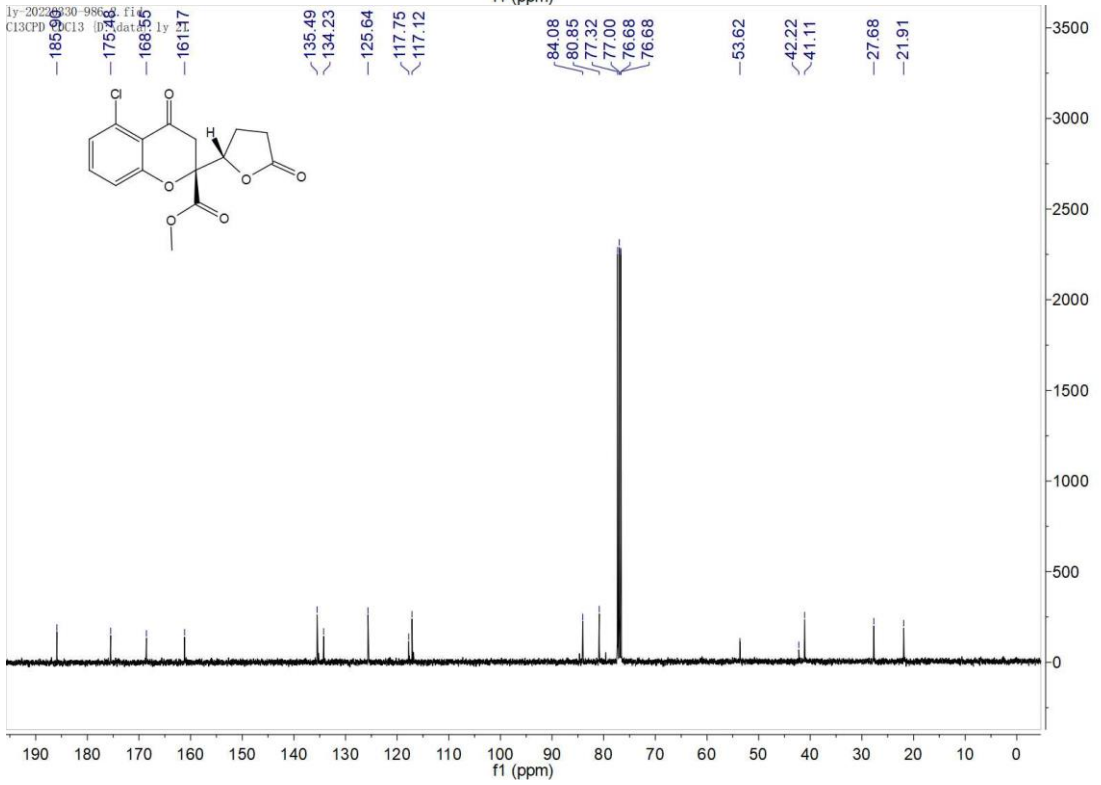

3d

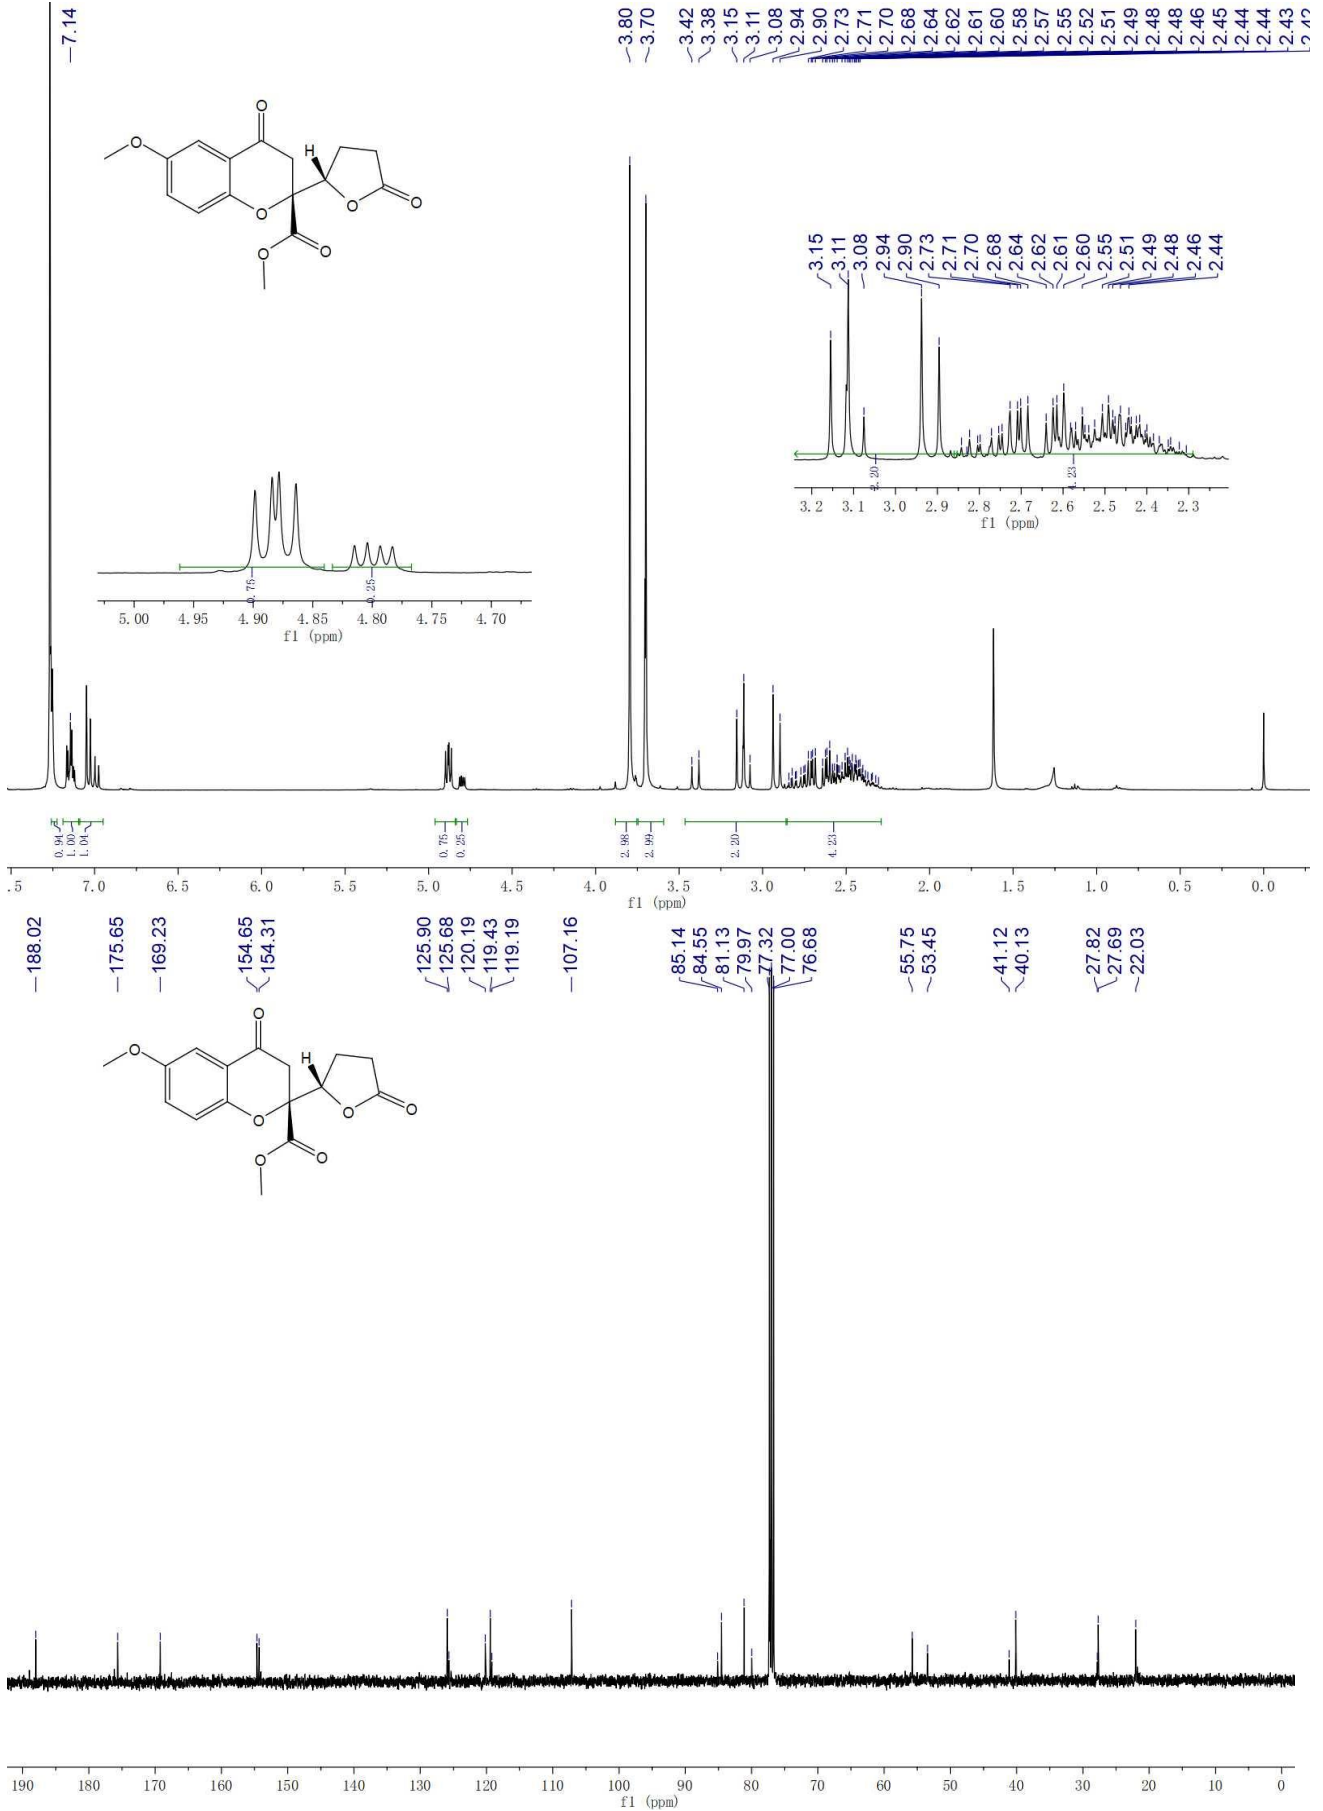

3e

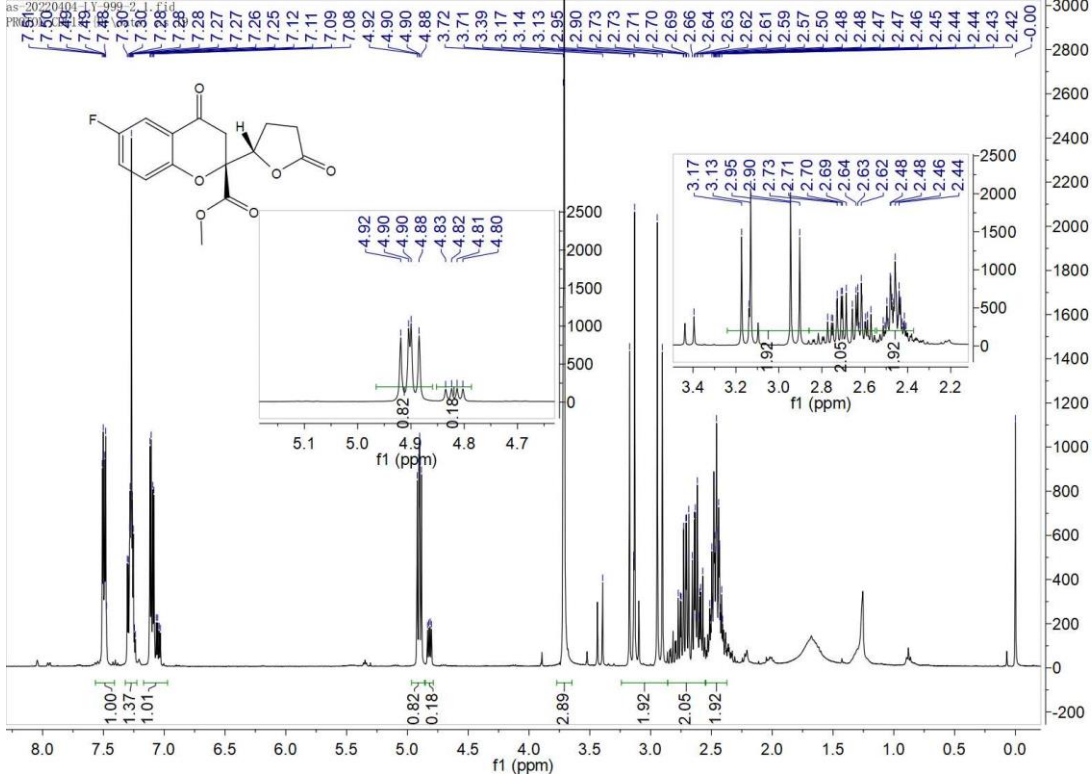

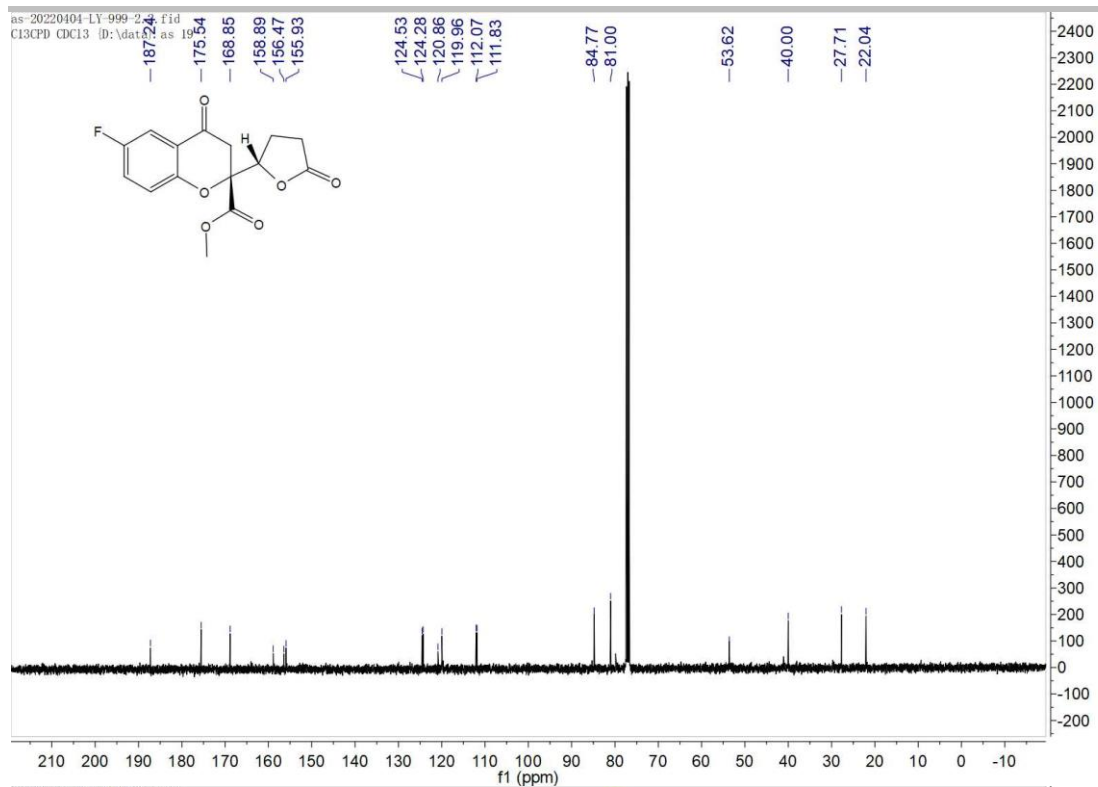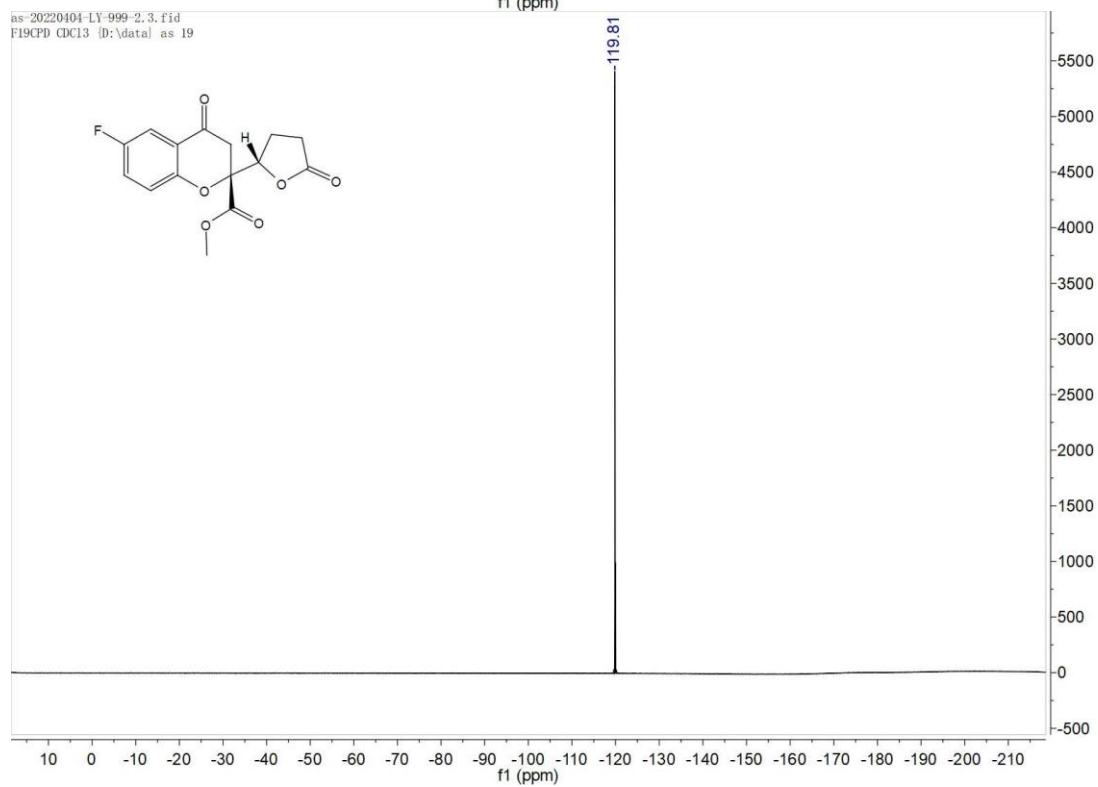

3f

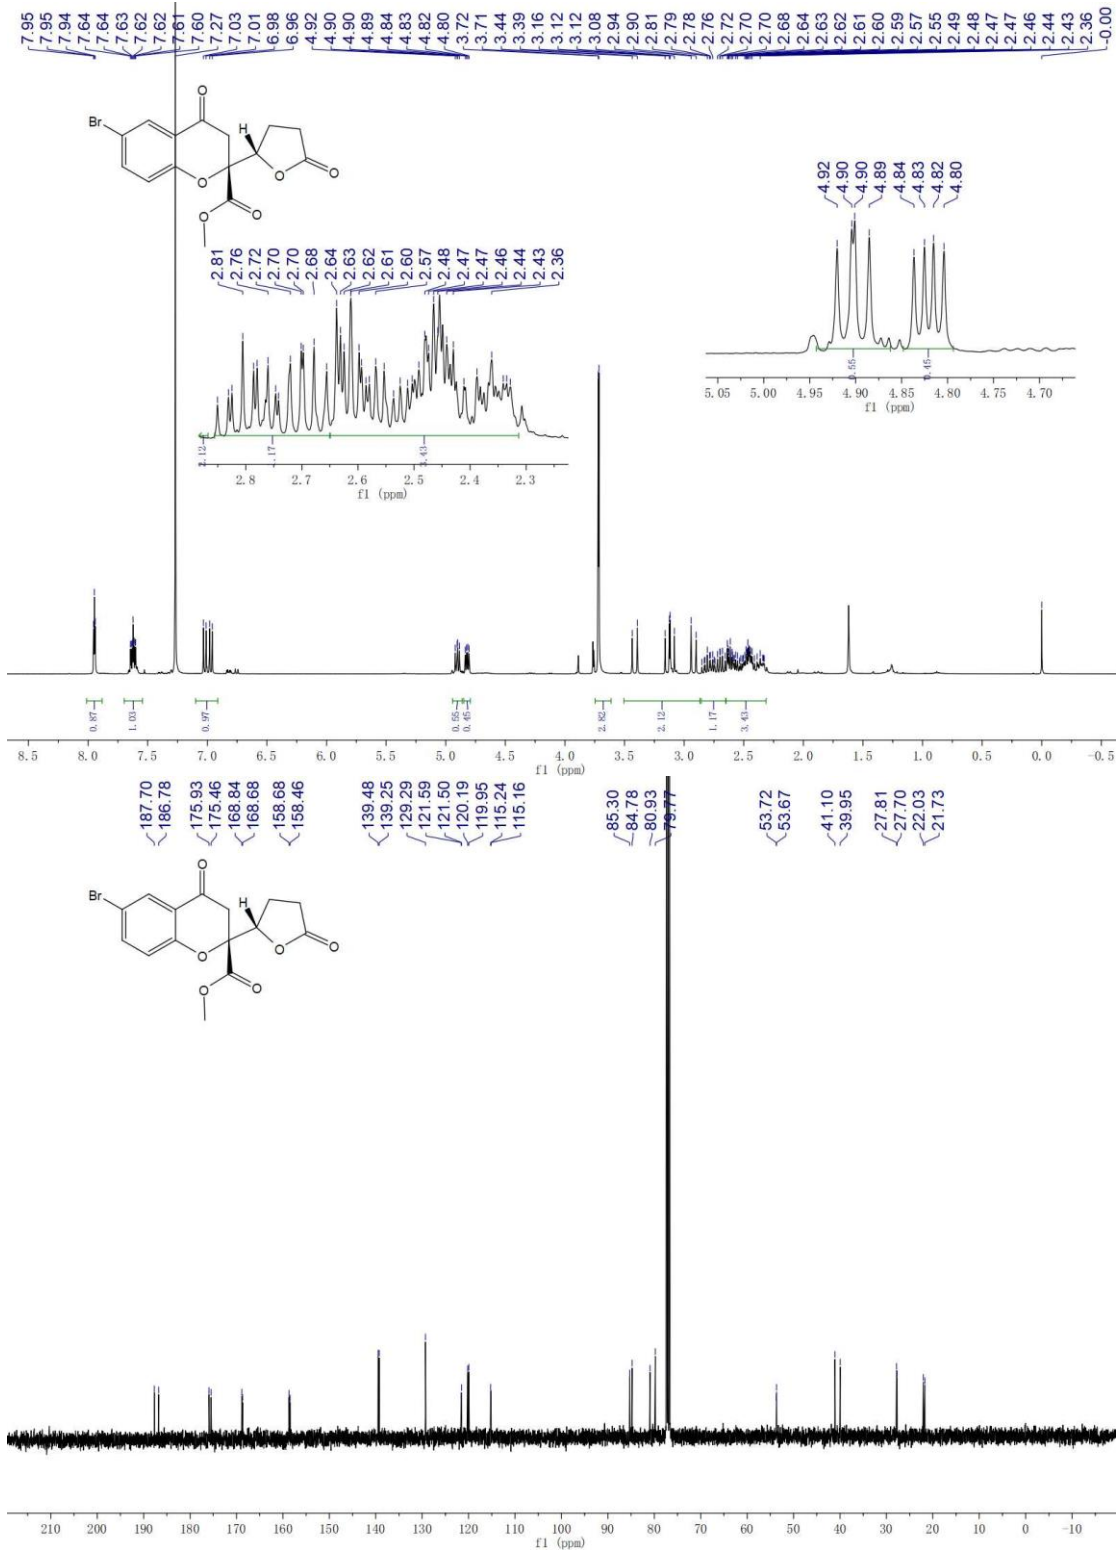



3g

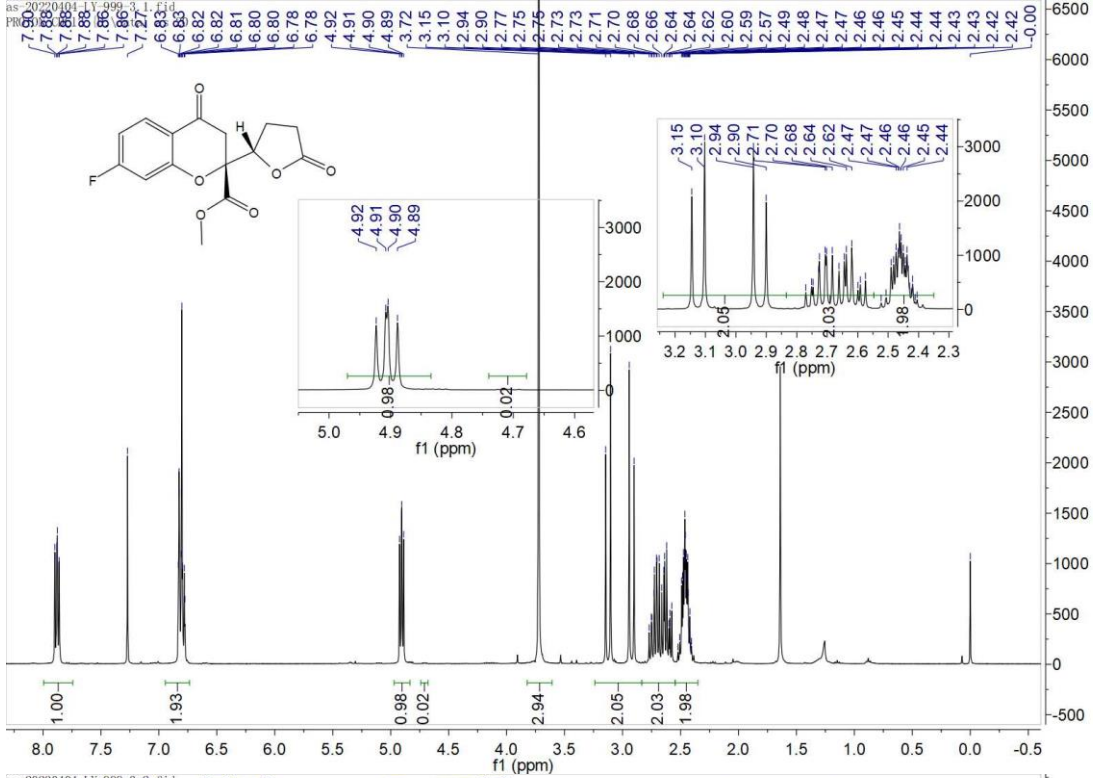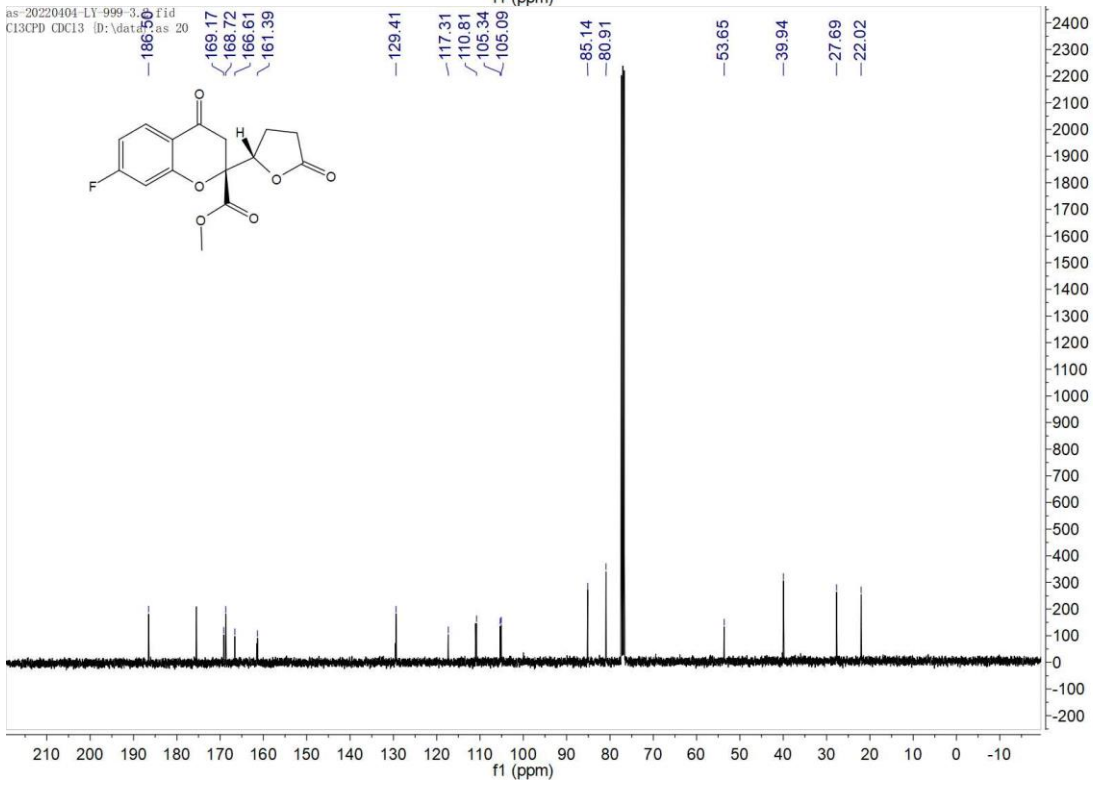

as-20220404-LY-999-3.3.fid  
F19CPD CDCl3 [D:\data] as 20

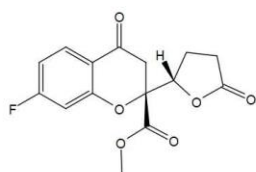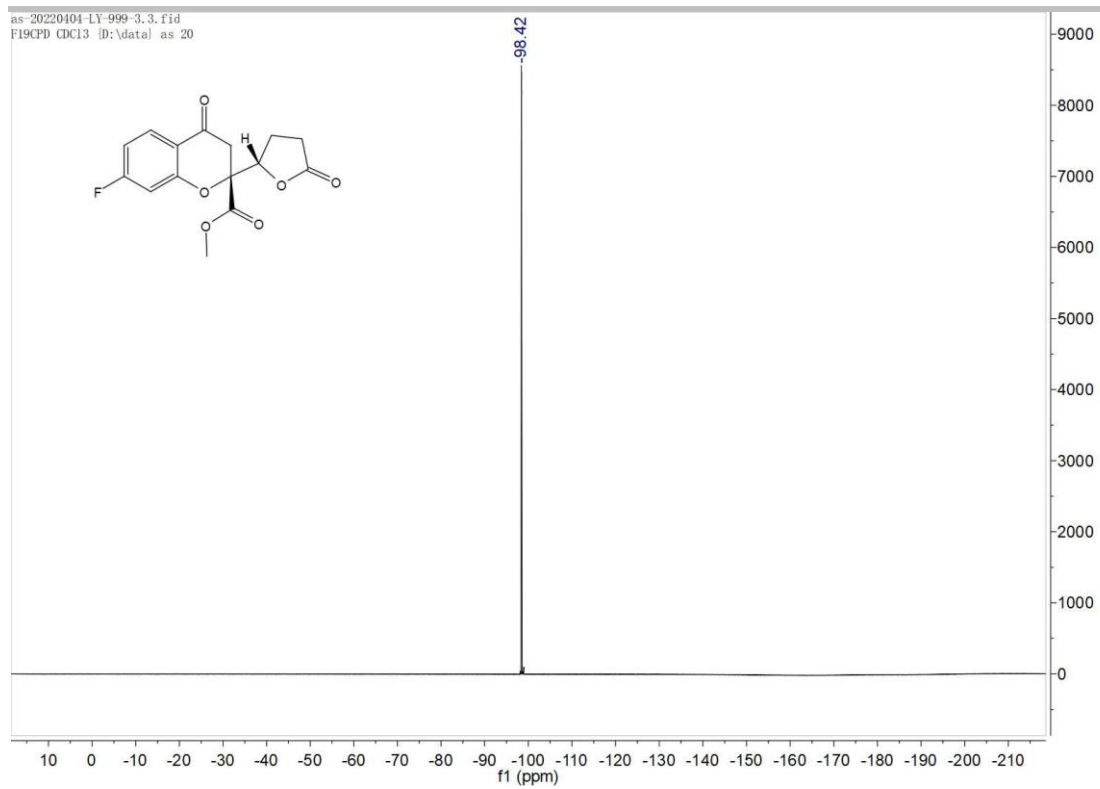

3h

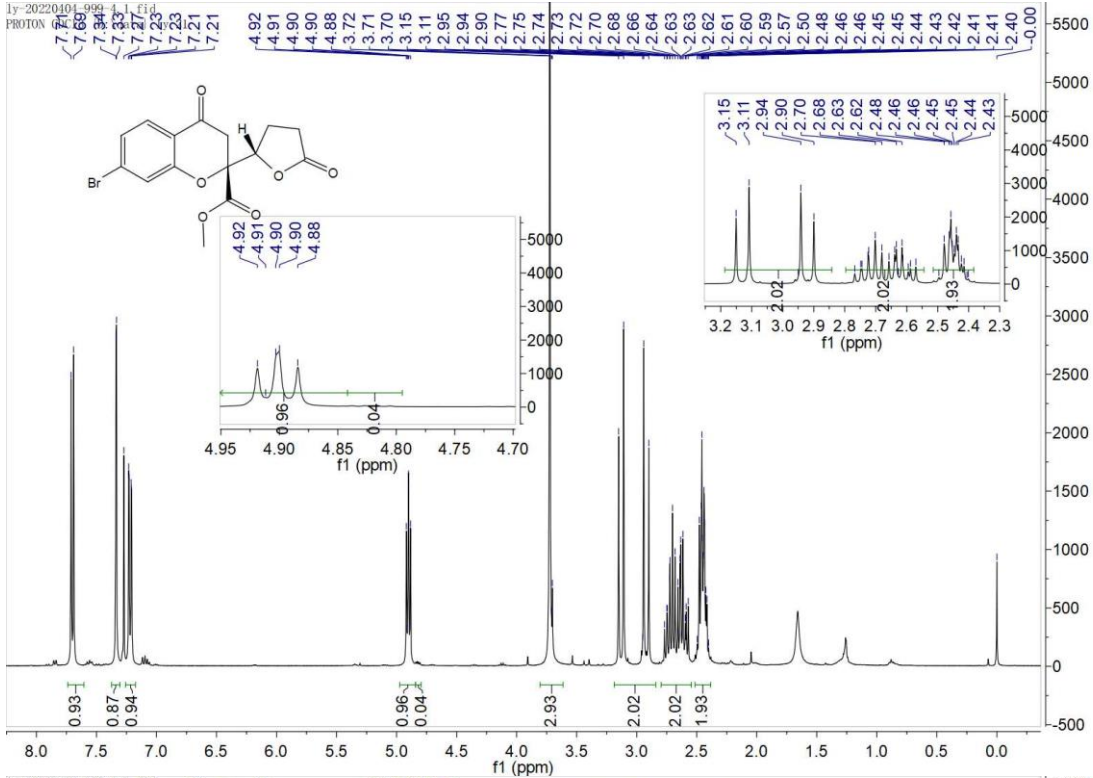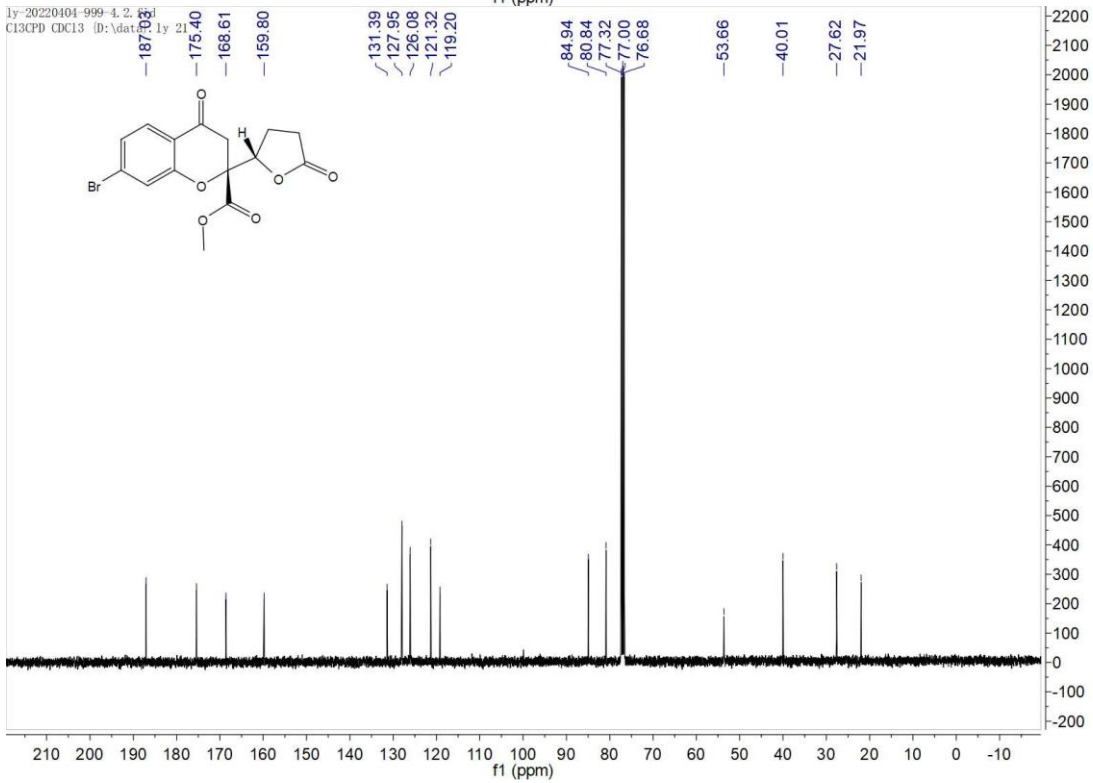

3i

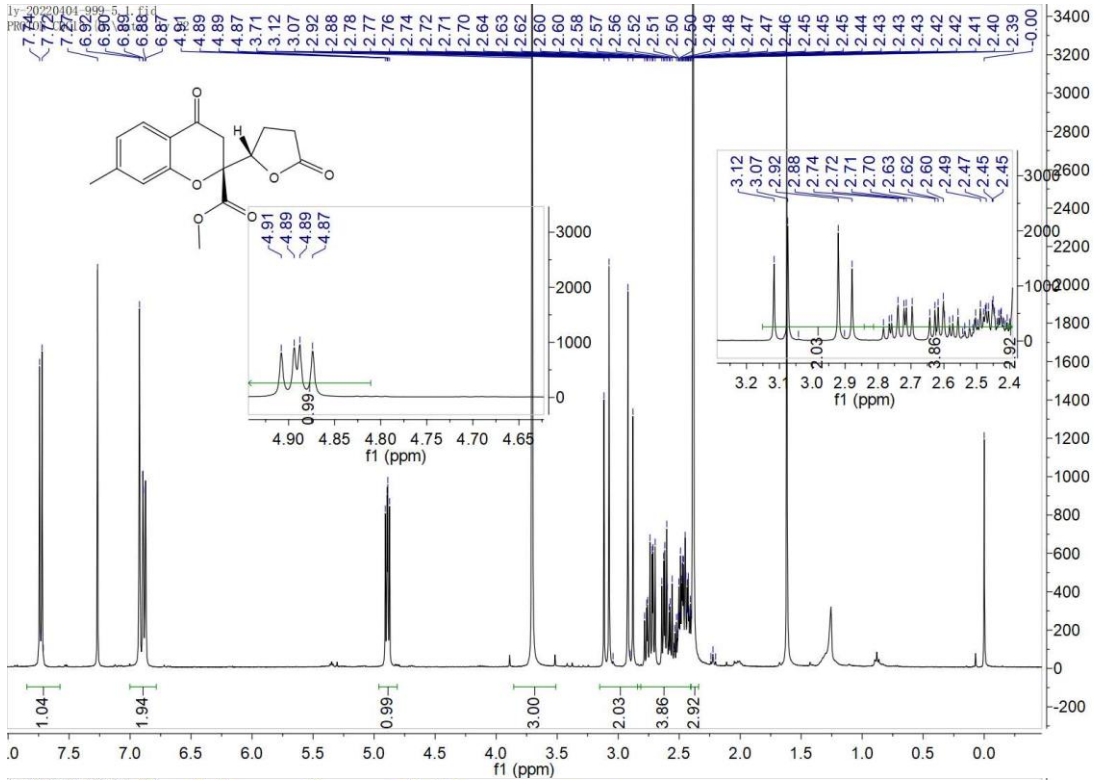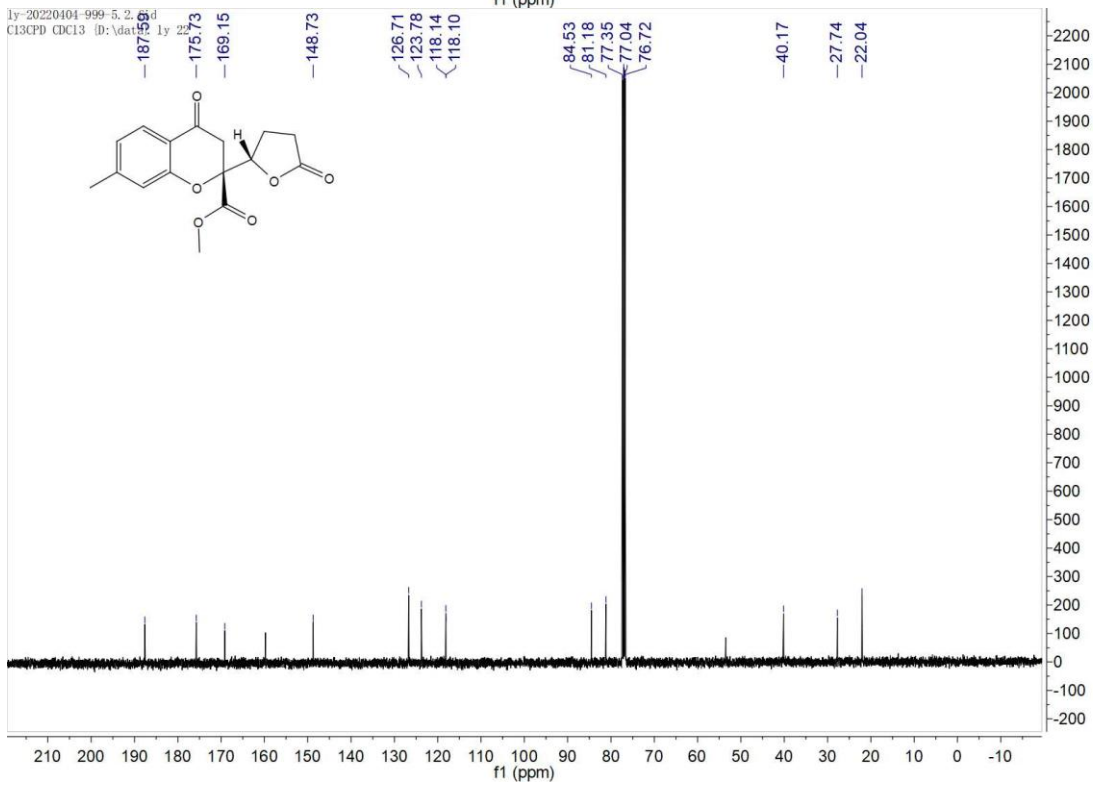

3j

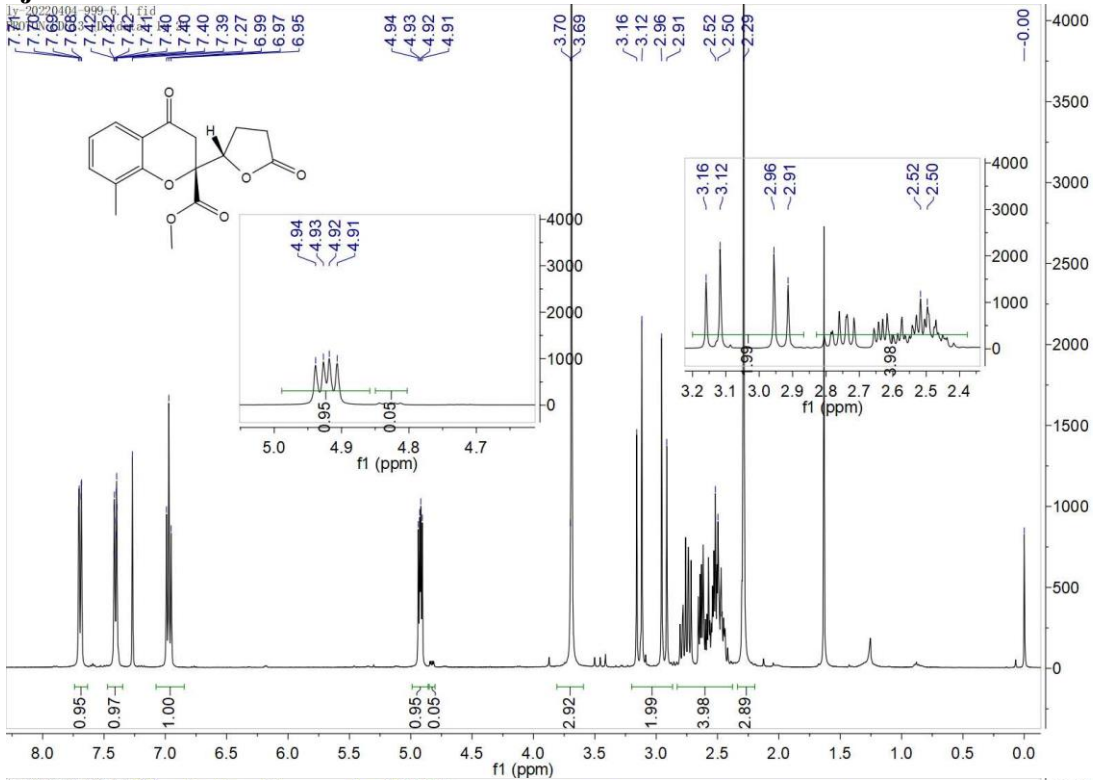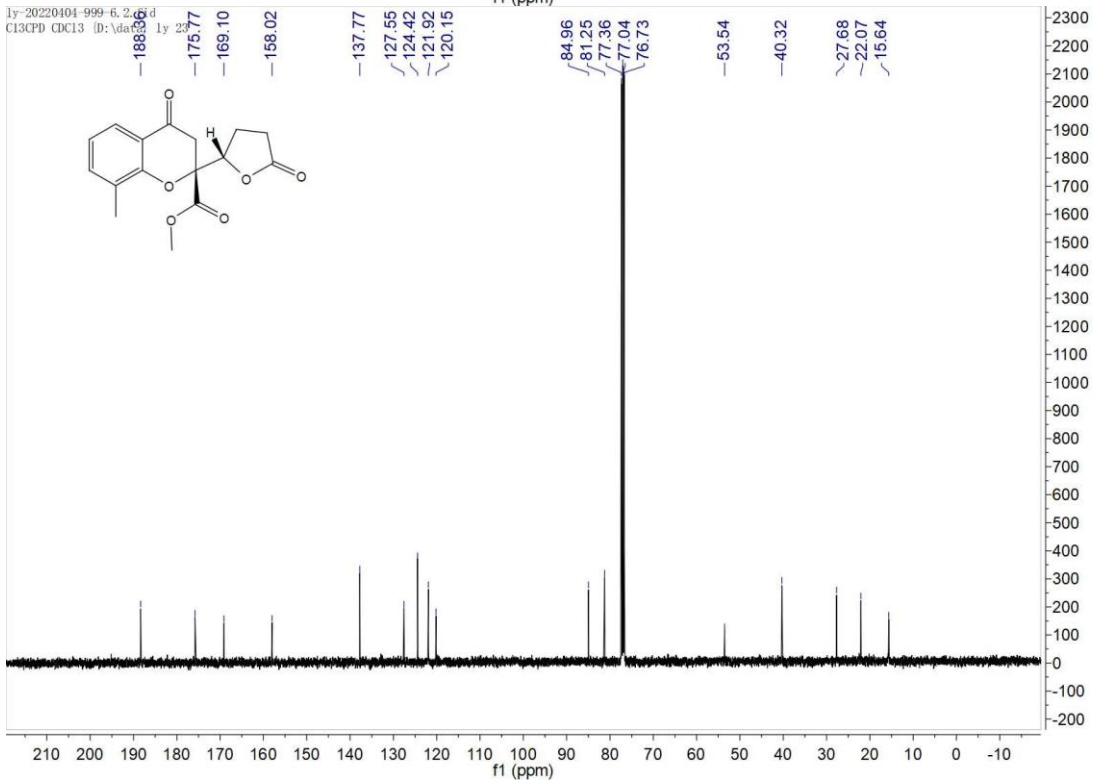

3k

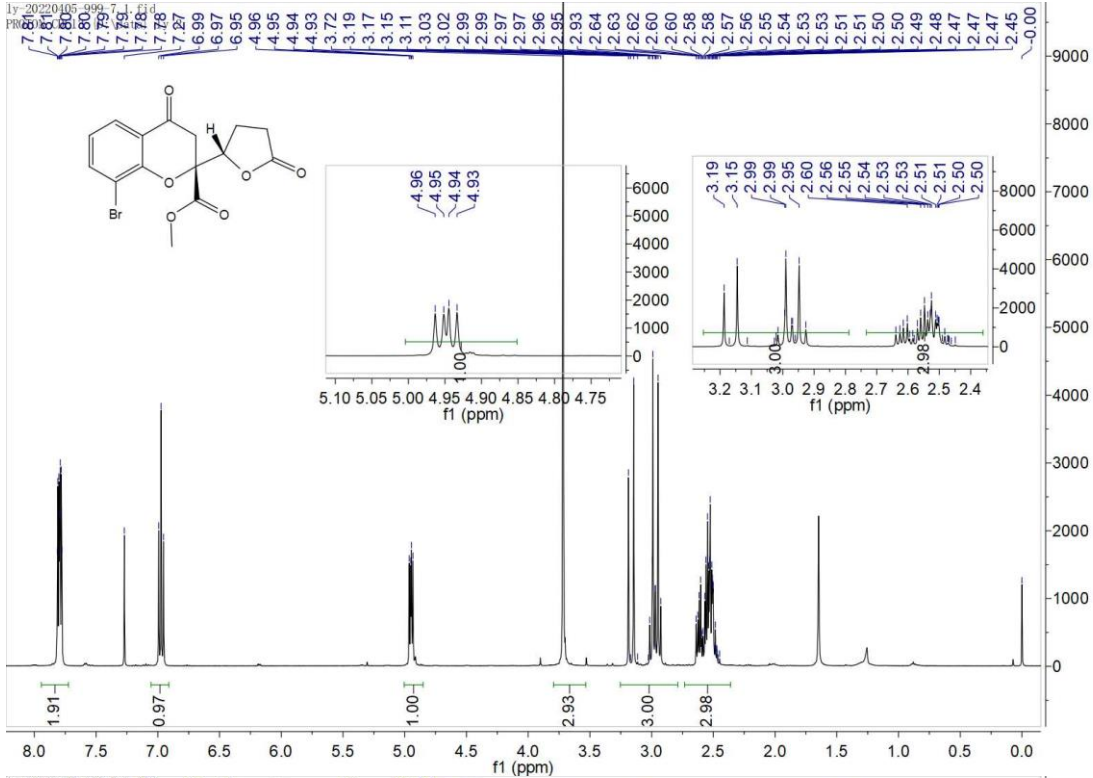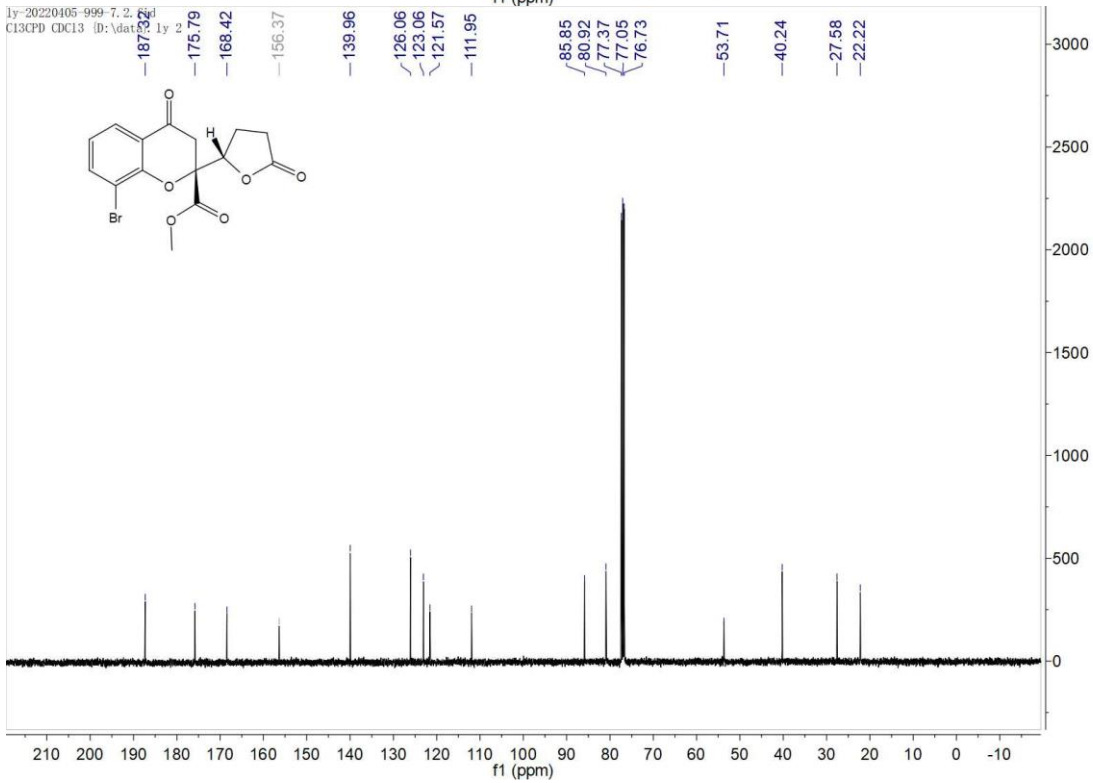

31

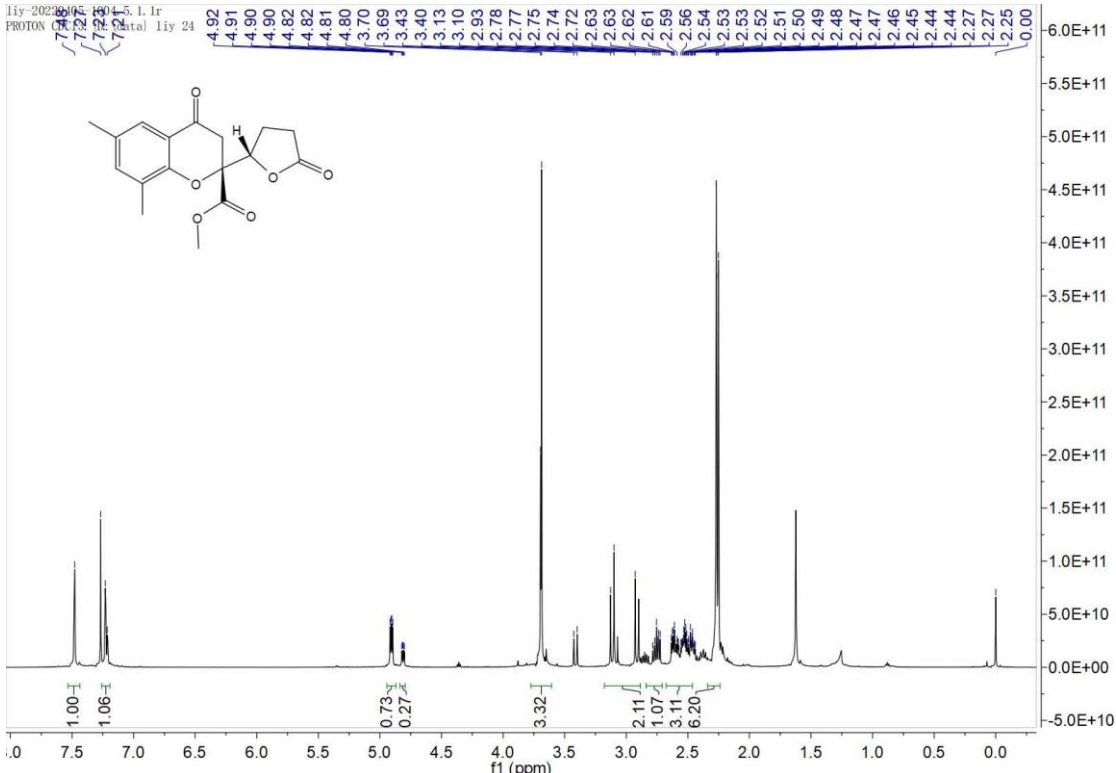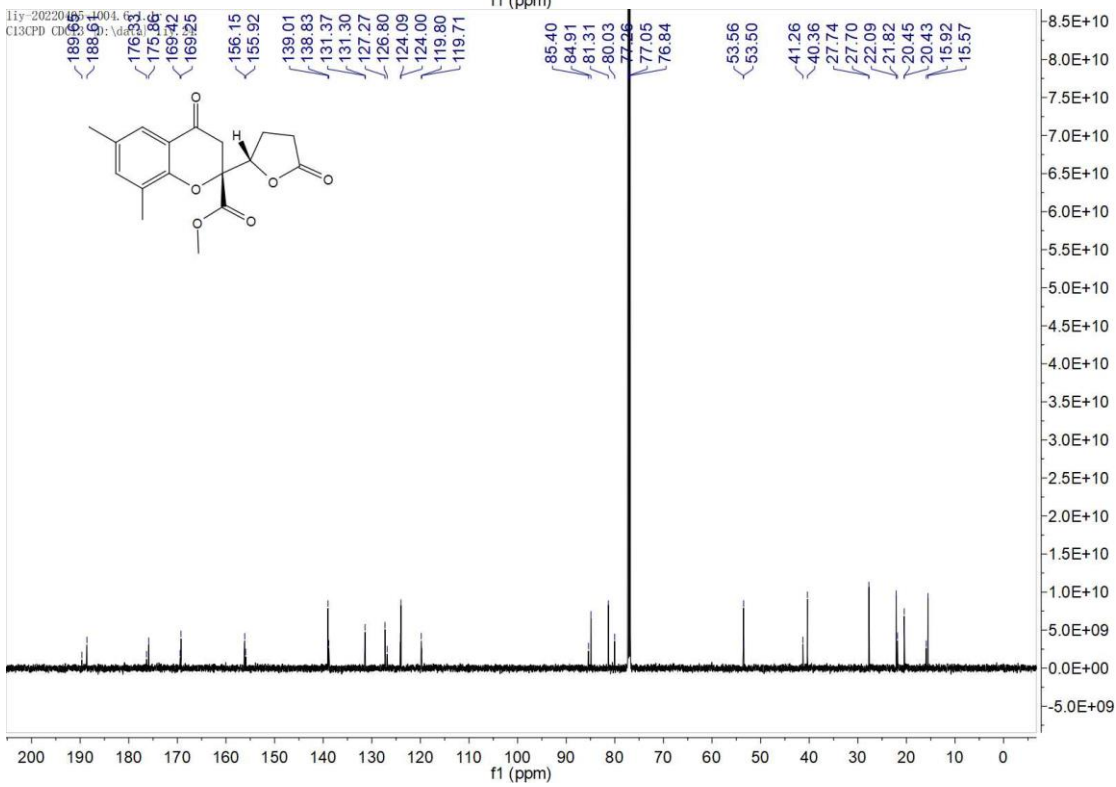

3m

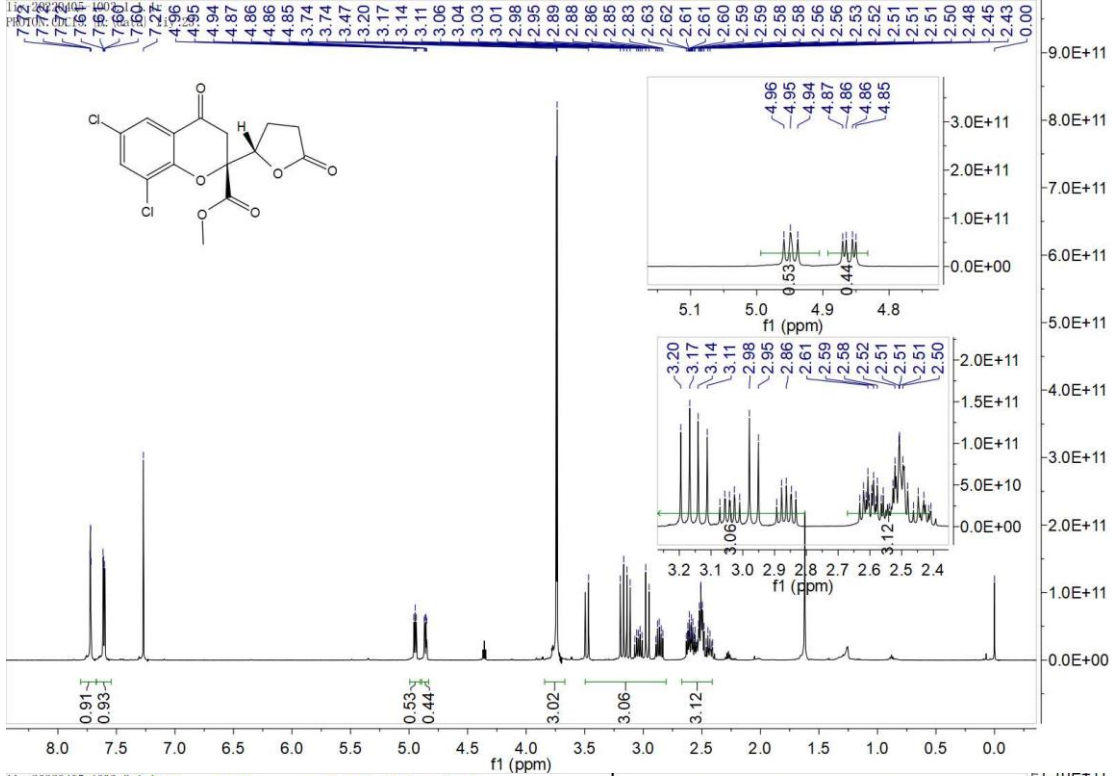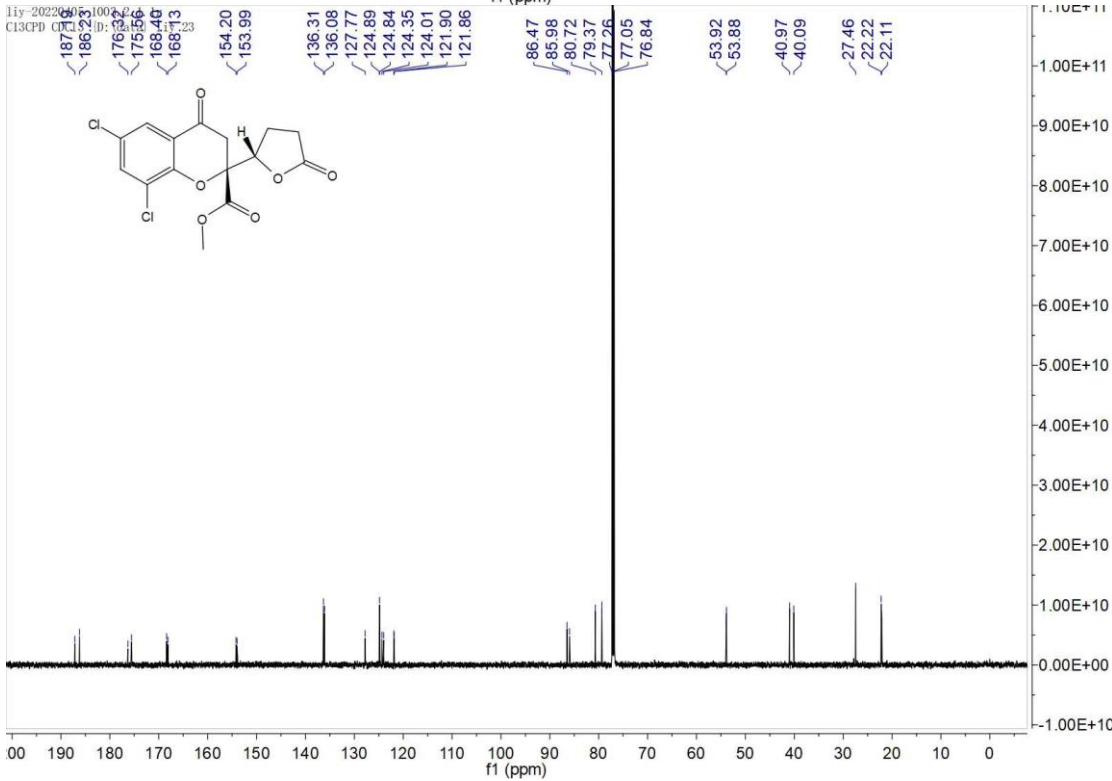



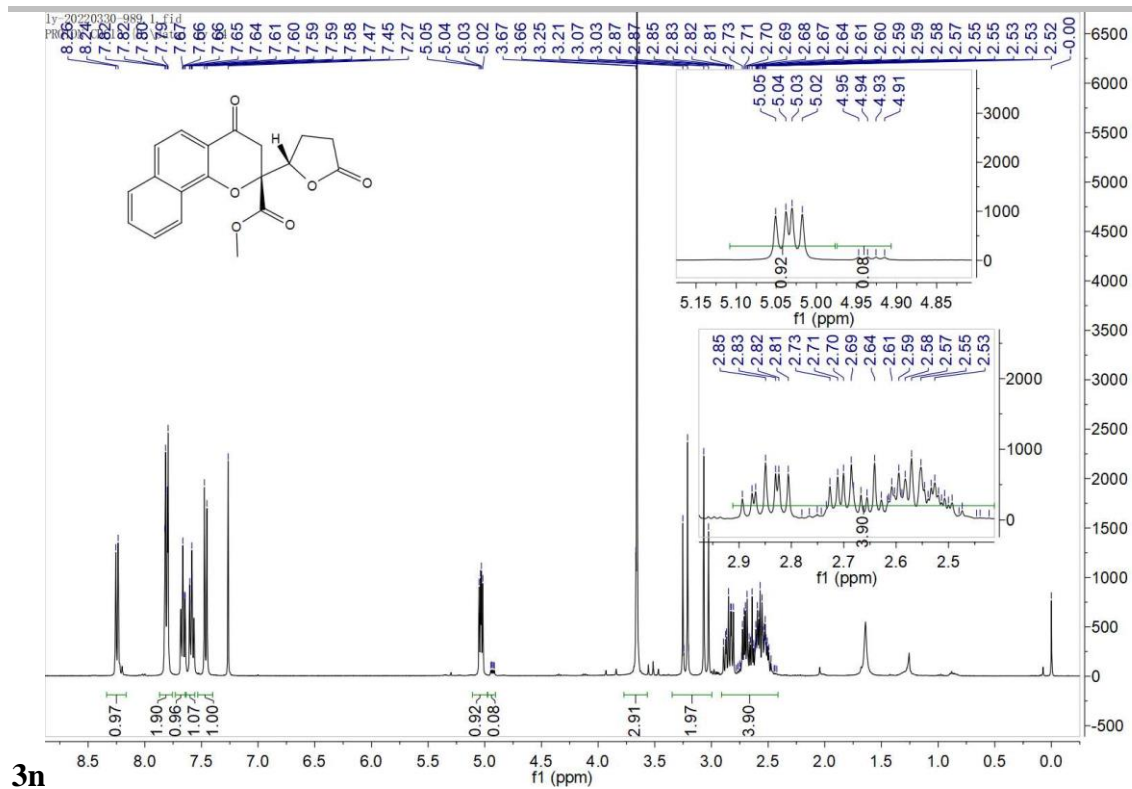

**3n**

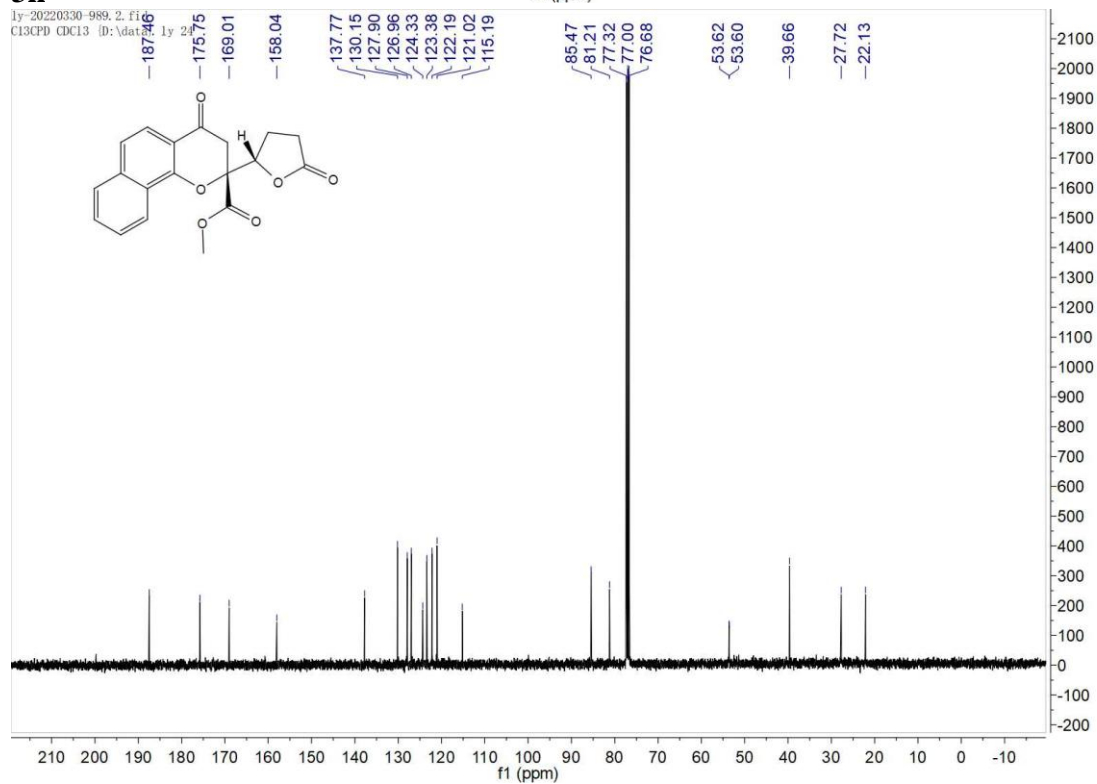

30

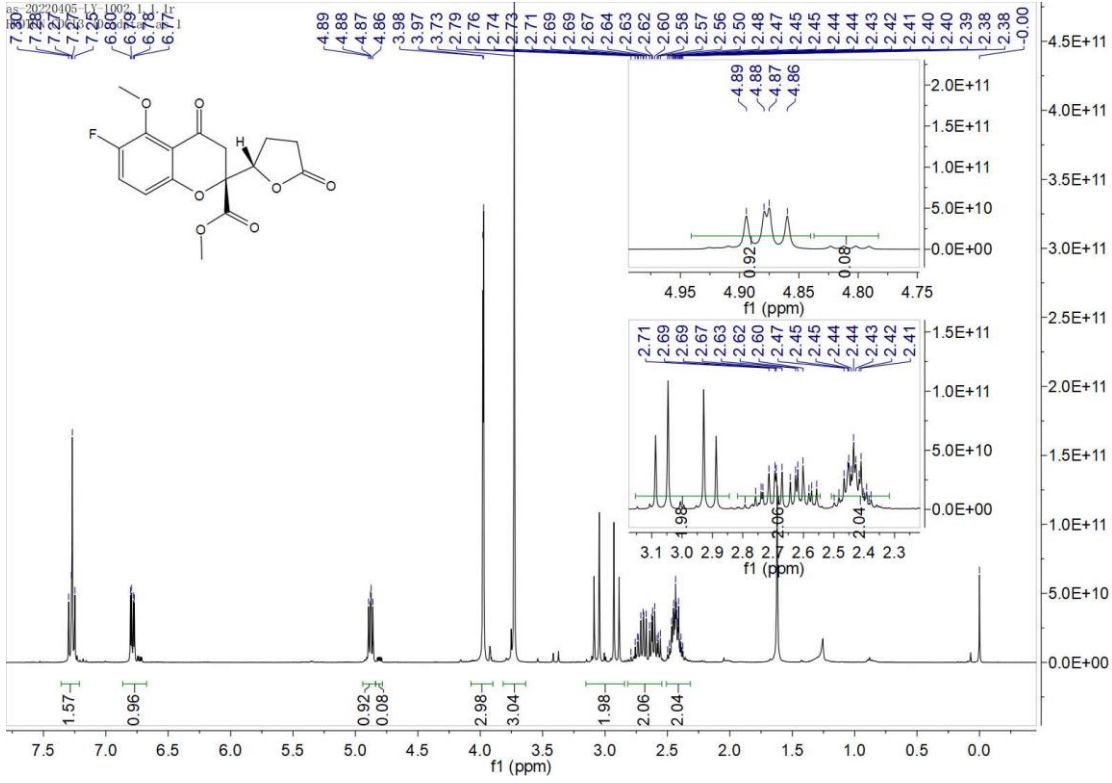

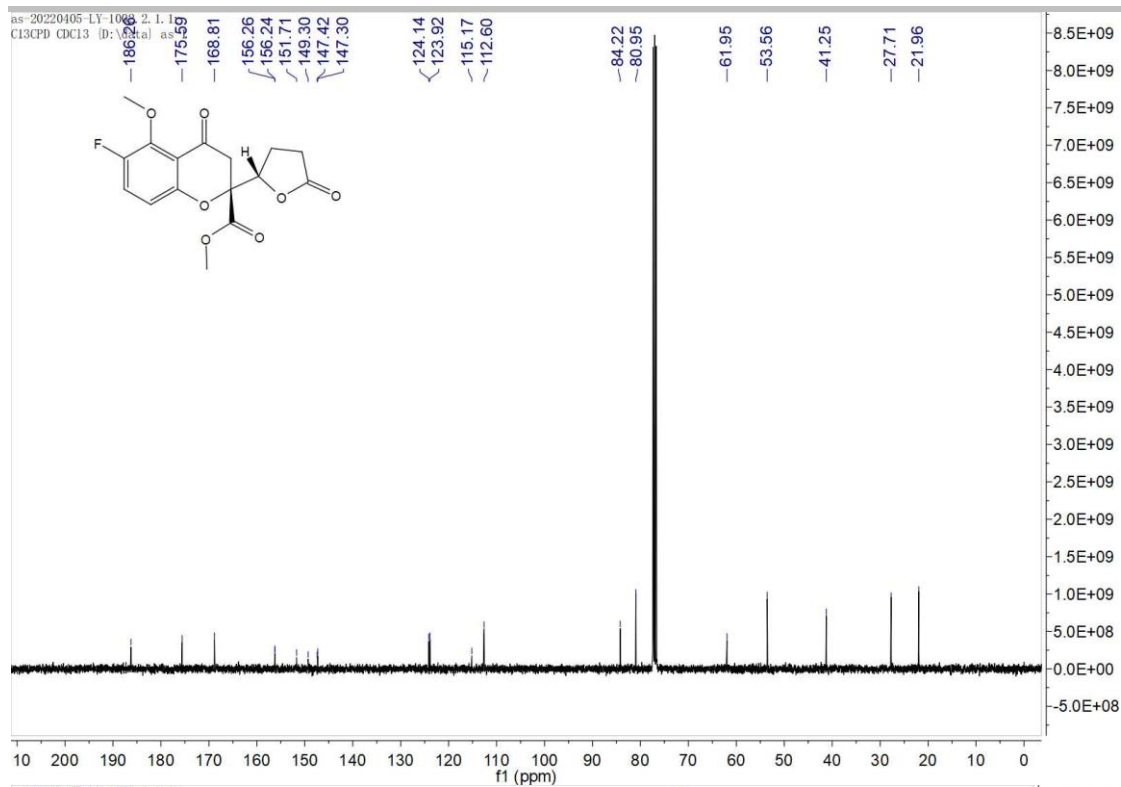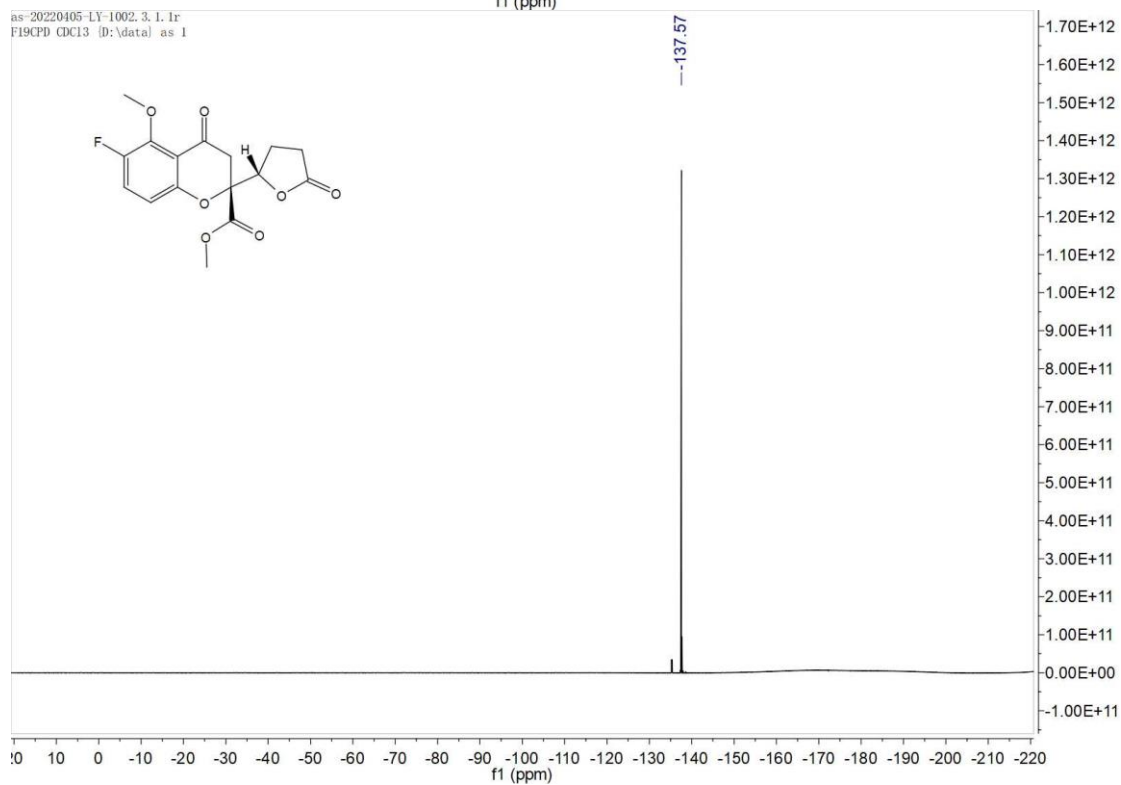

3p

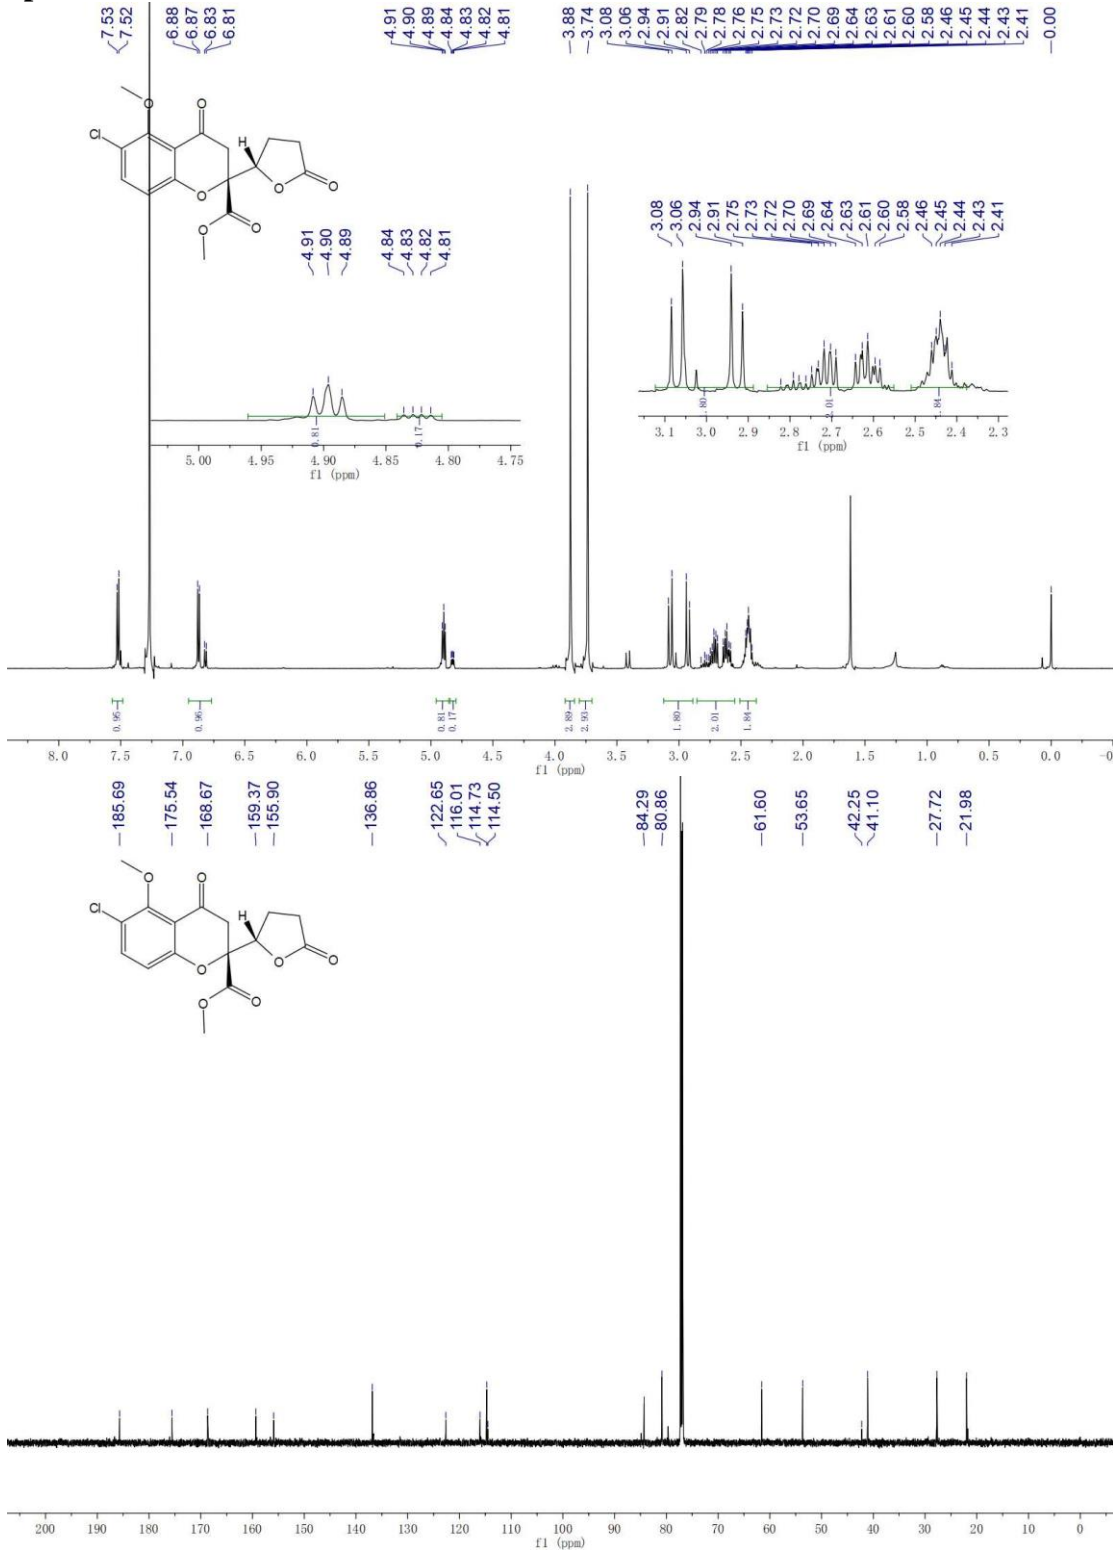

3q

ly-20220330-992.1.fid  
 PROTON CDCl3 (D:\data\ly

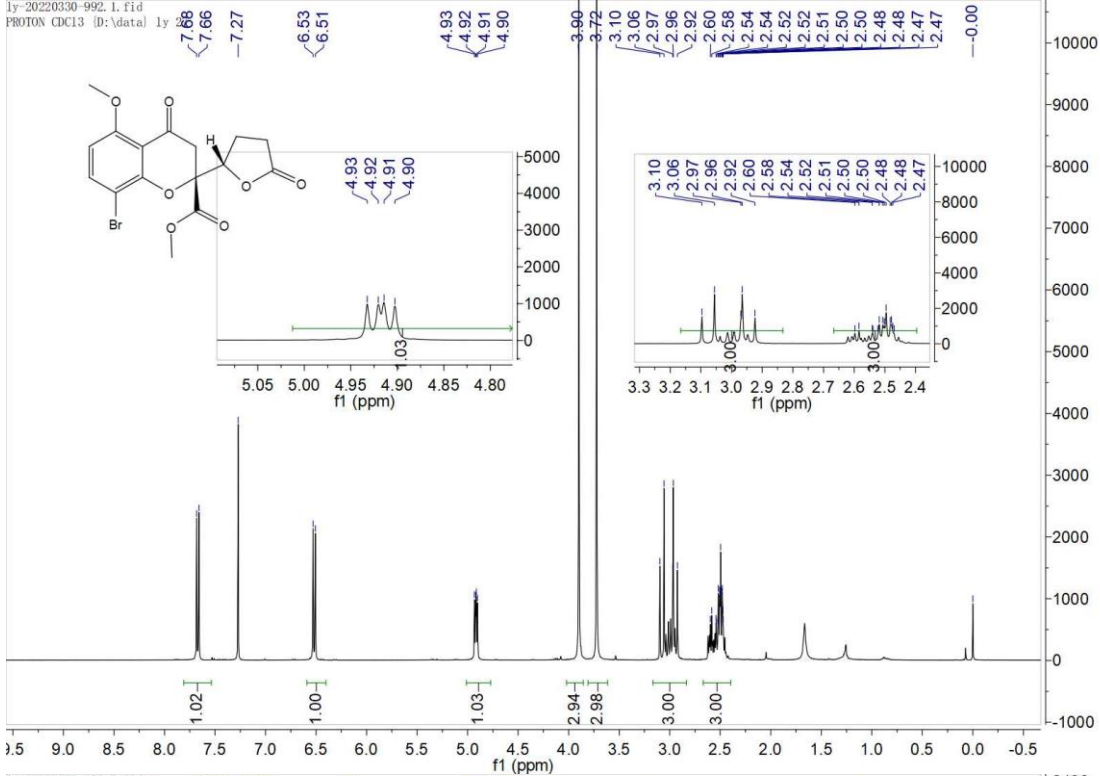

ly-20220330-992.2.fid  
 13C NMR CDCl3 (D:\data\ly

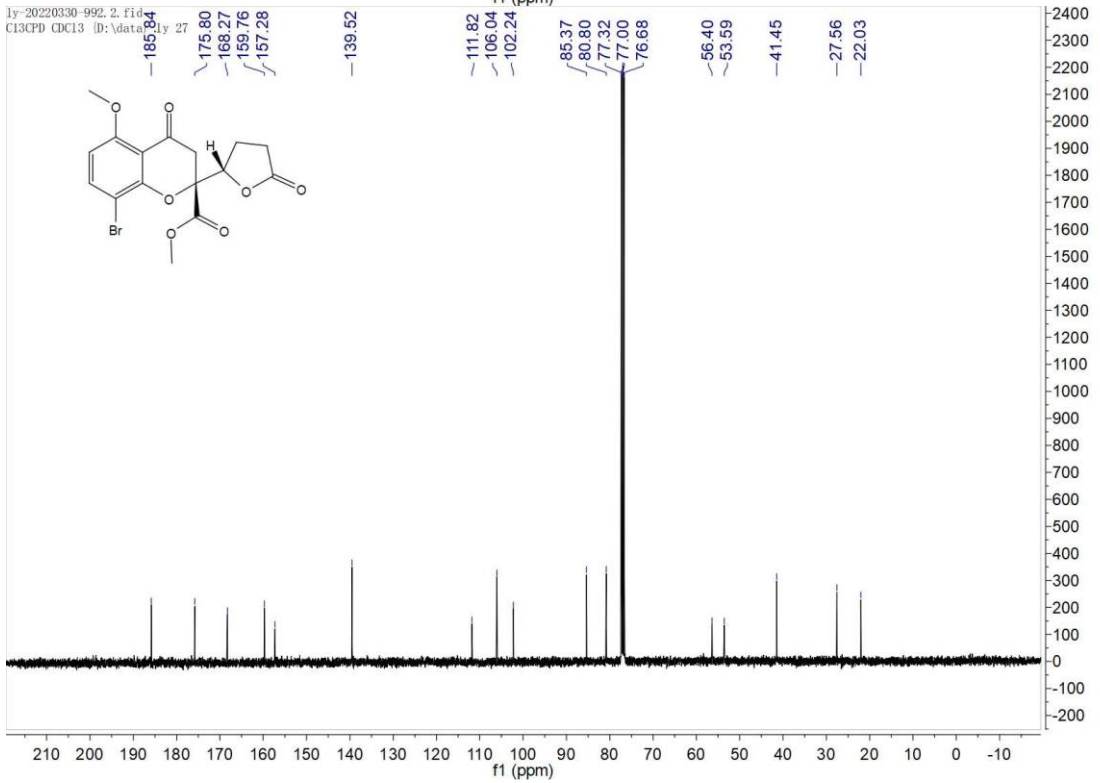

### 3r

ly-20220330-990\_1.fid  
PROTON CDCl3 (D:\data)

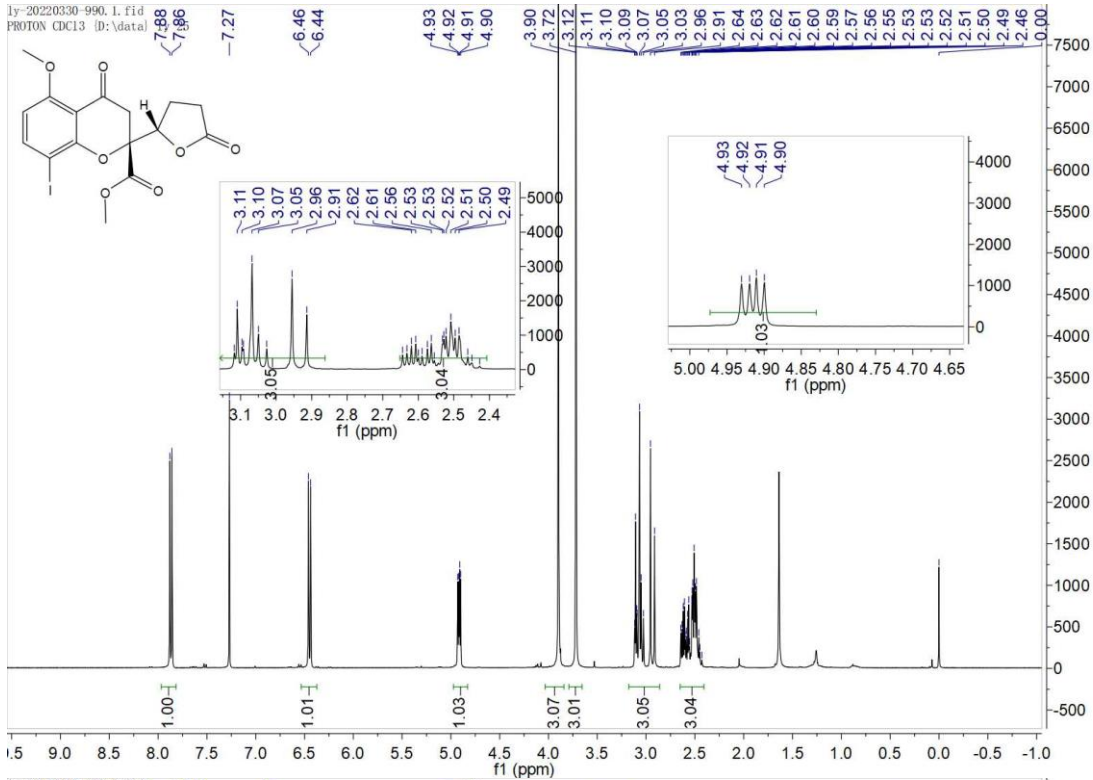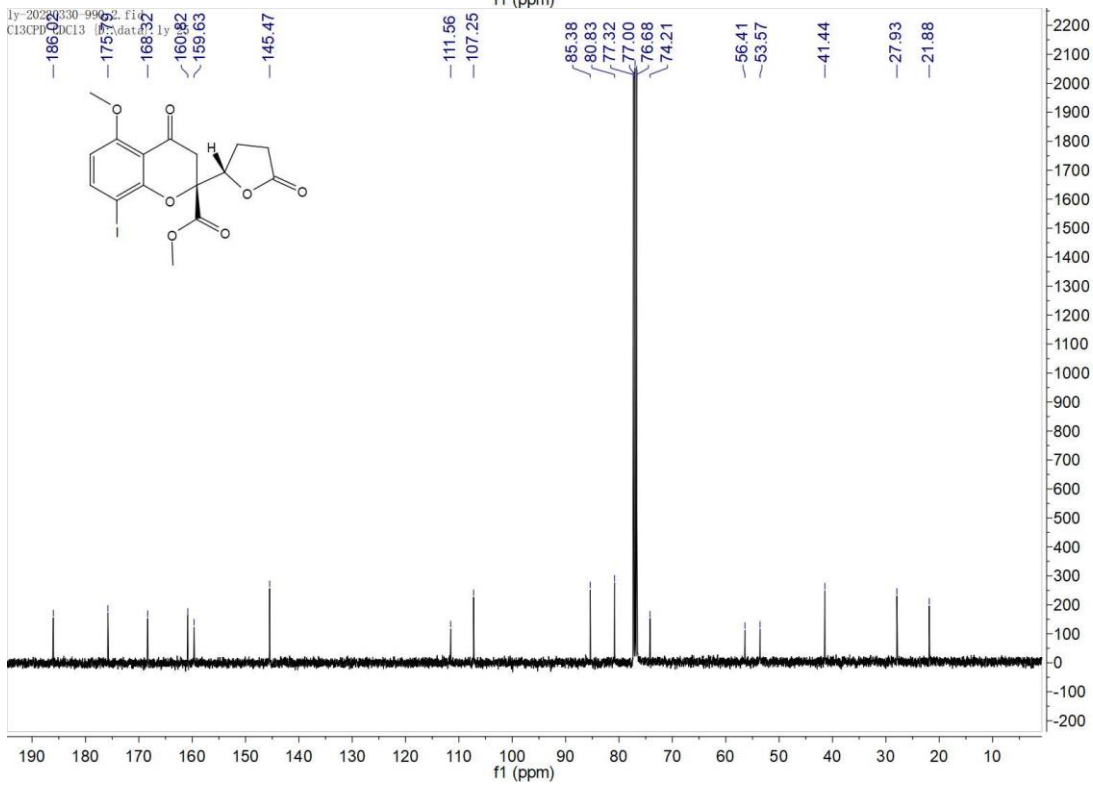

3s

liy-20220335\_981.15.1.ir  
 PROTON CDC (D:\data\1

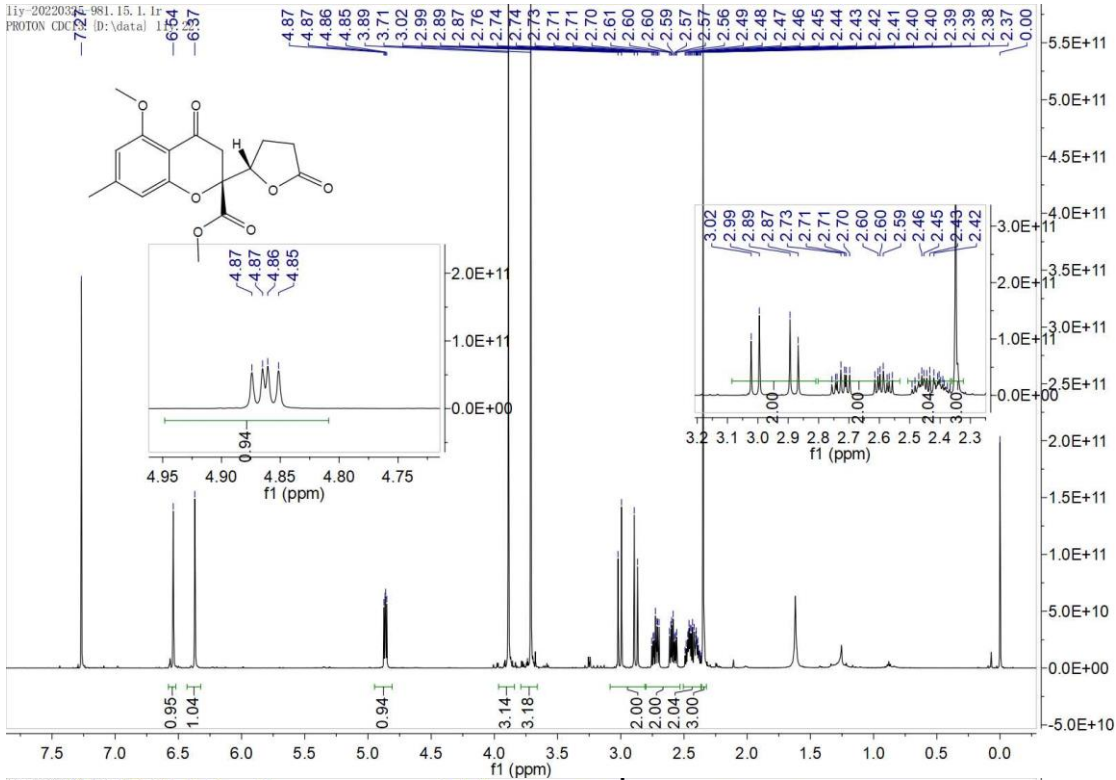

liy-20220335\_981.15.1.ir  
 C13CPD CDC (D:\data\1

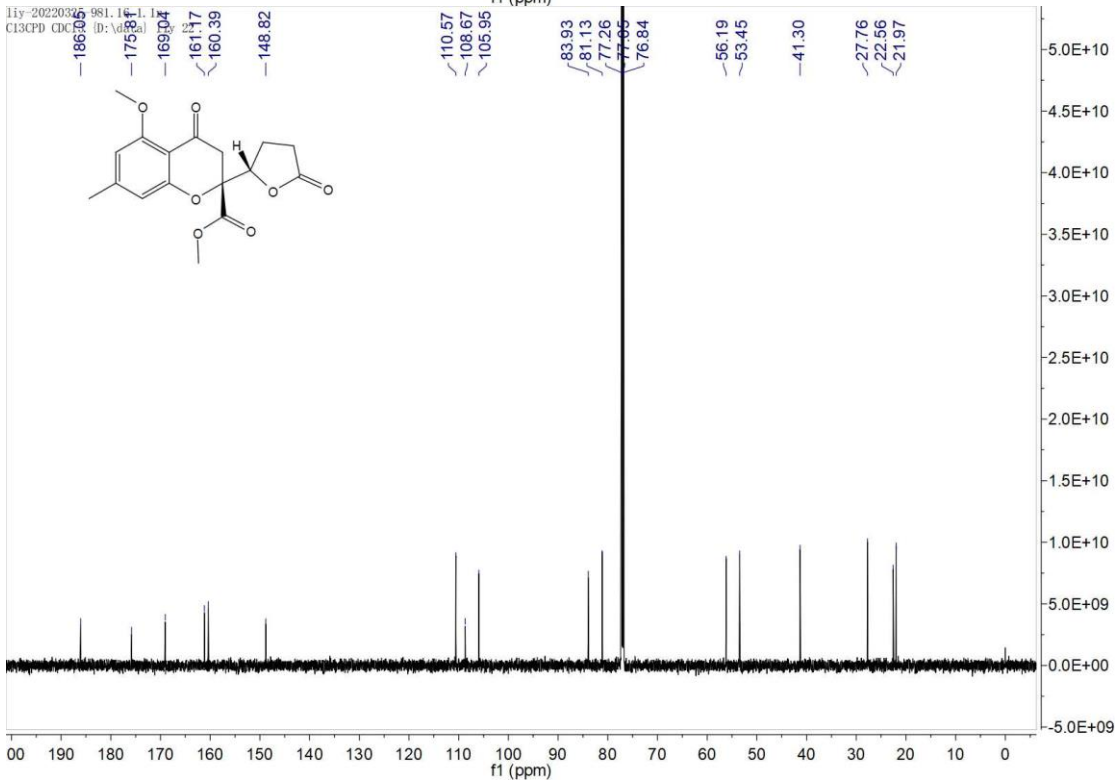

3t

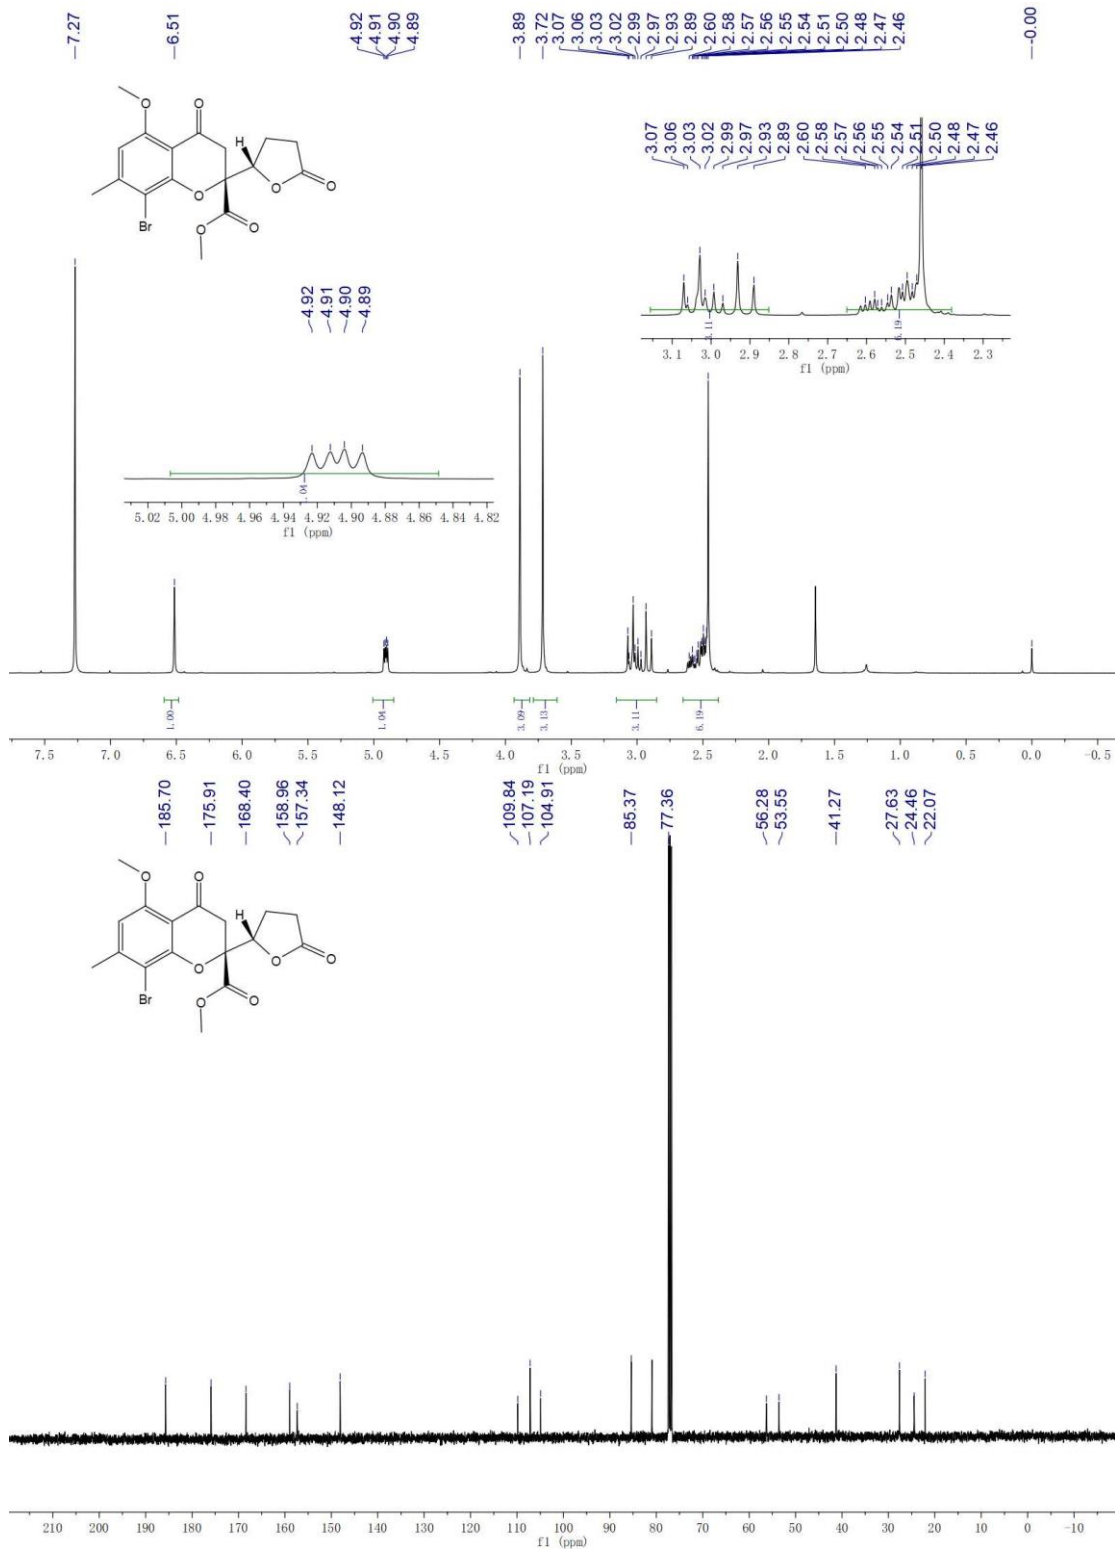



3u

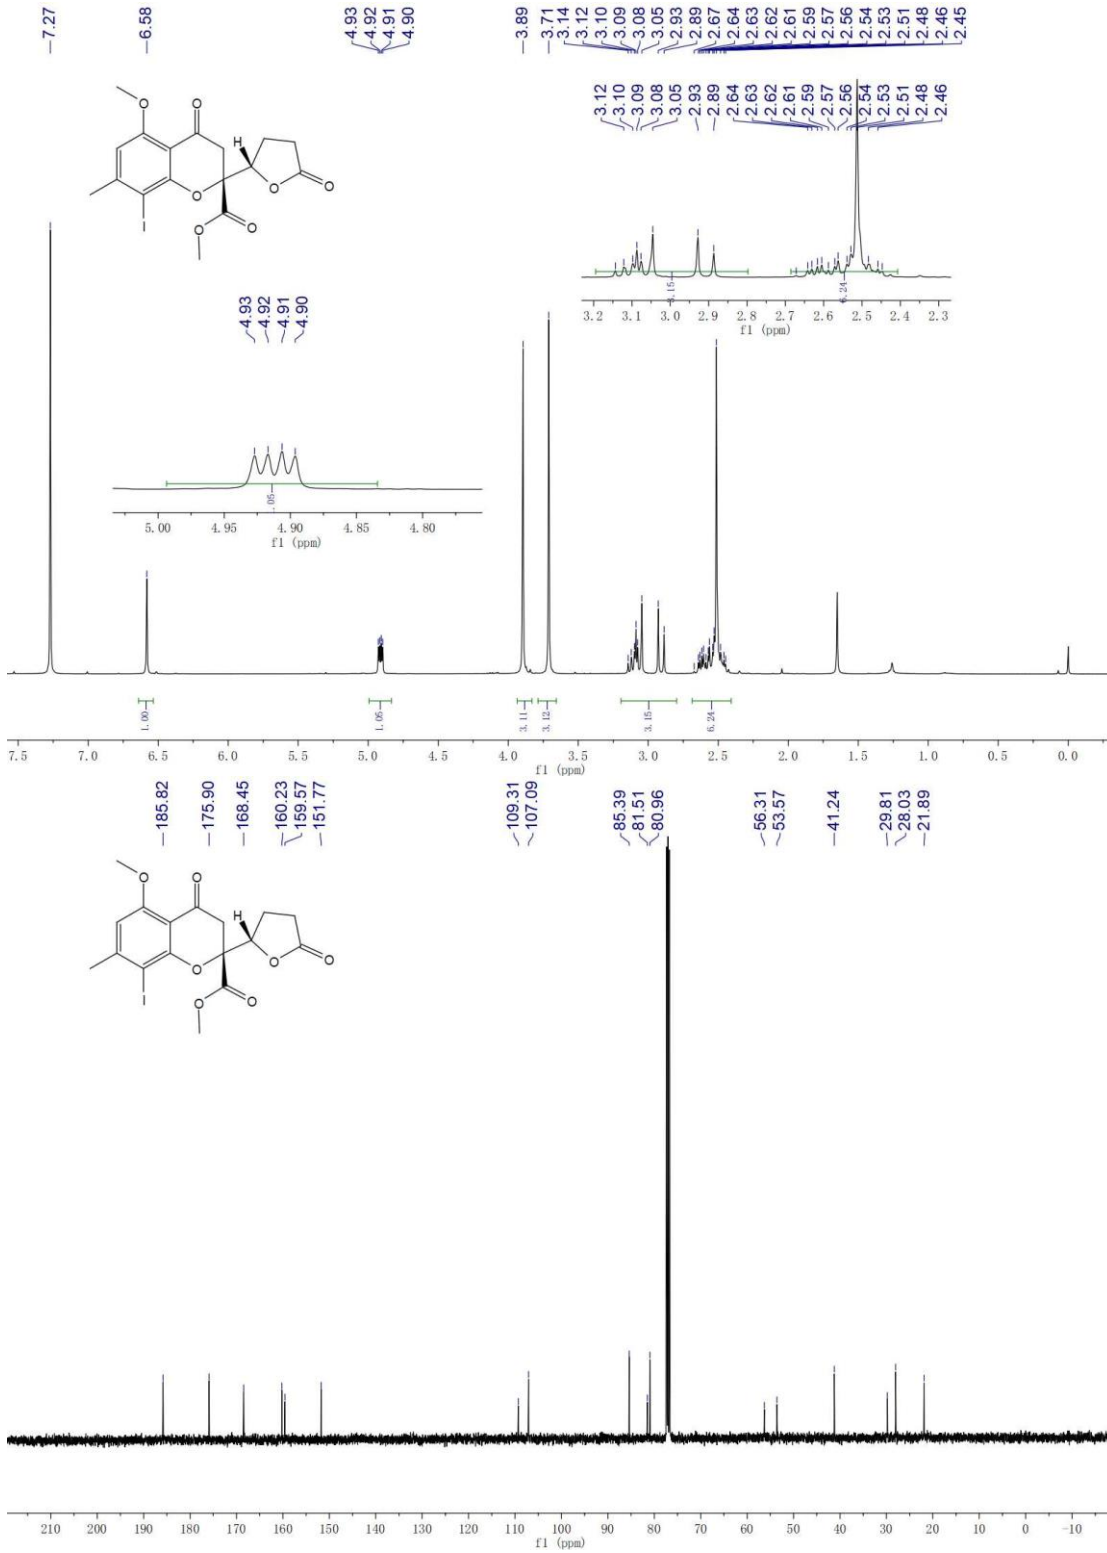

3b'

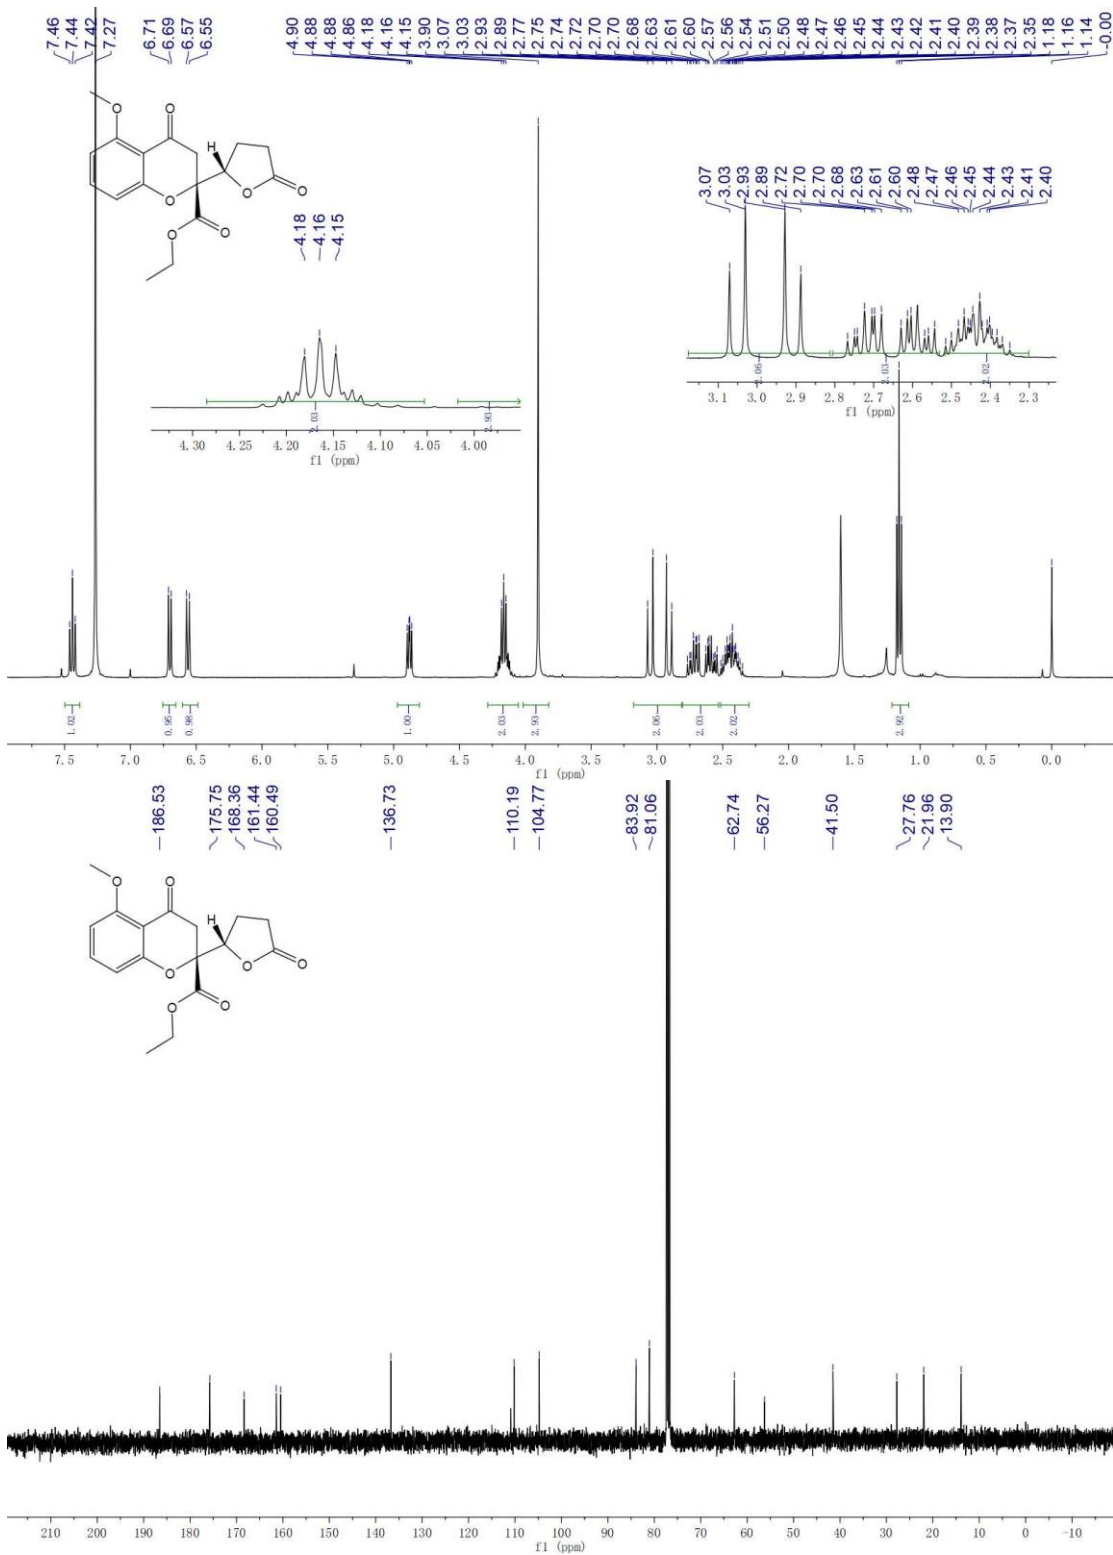

# Gonytolide C

ly-20220324-778\_1.fid  
 PROTON CDCl3 (D:\data\ly 51

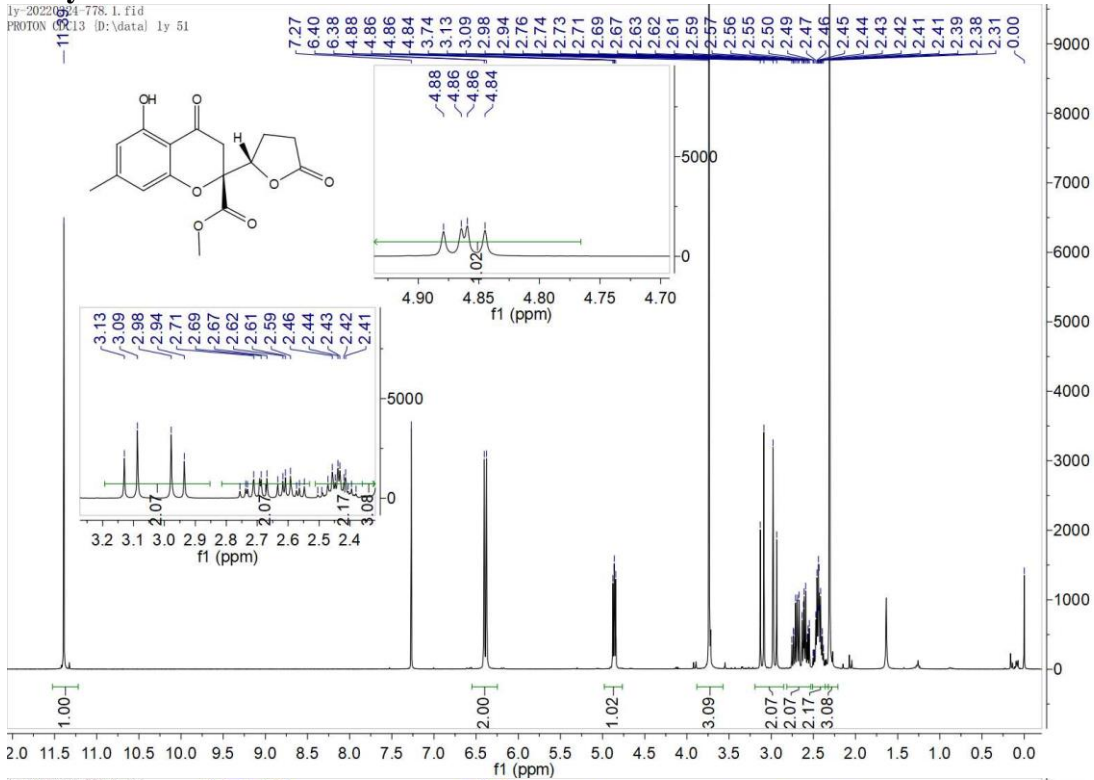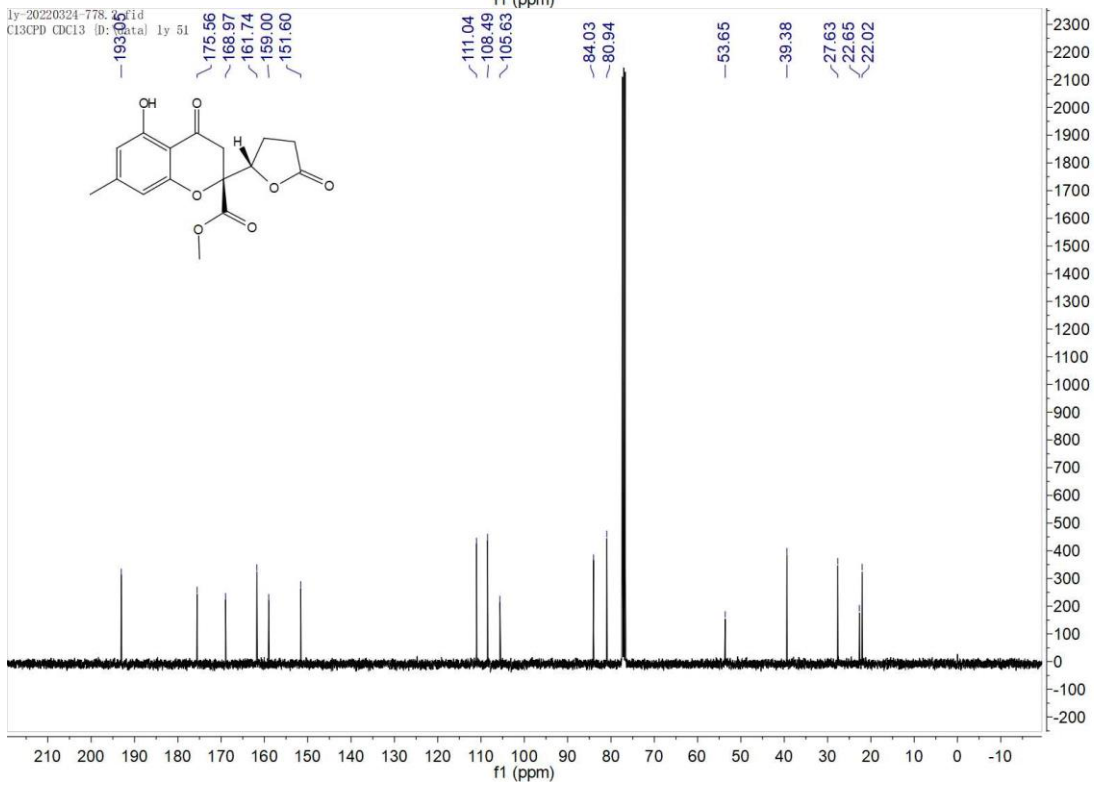

# Blennolide C

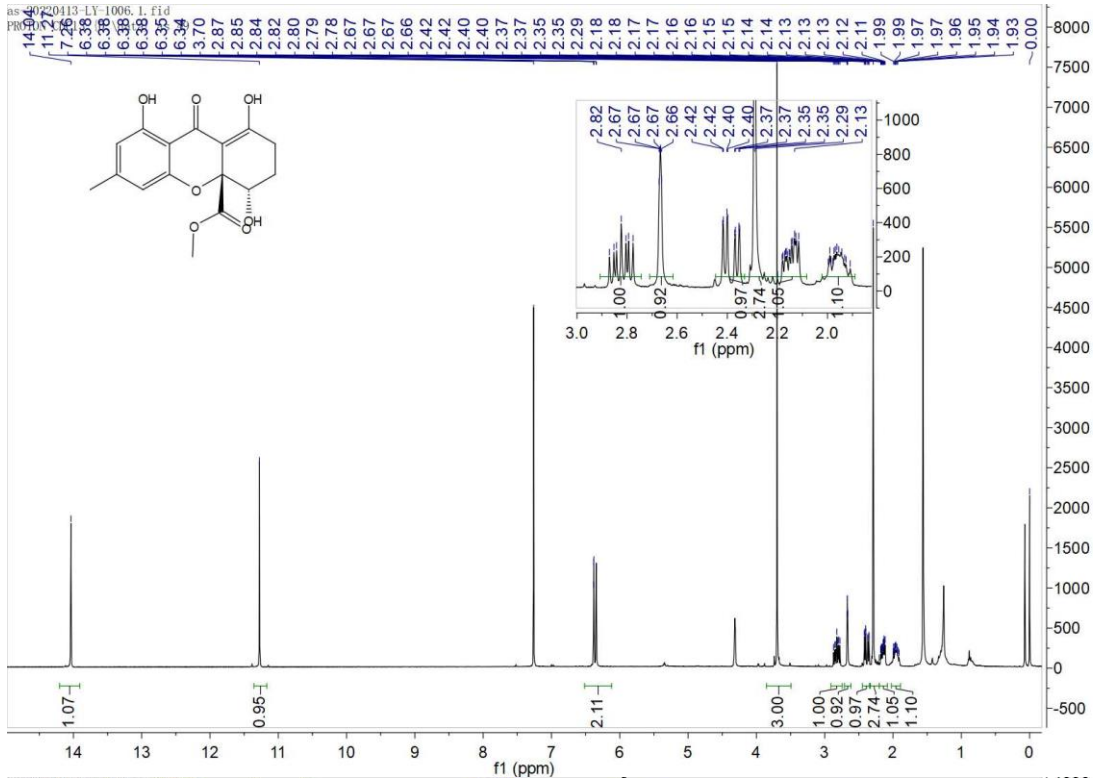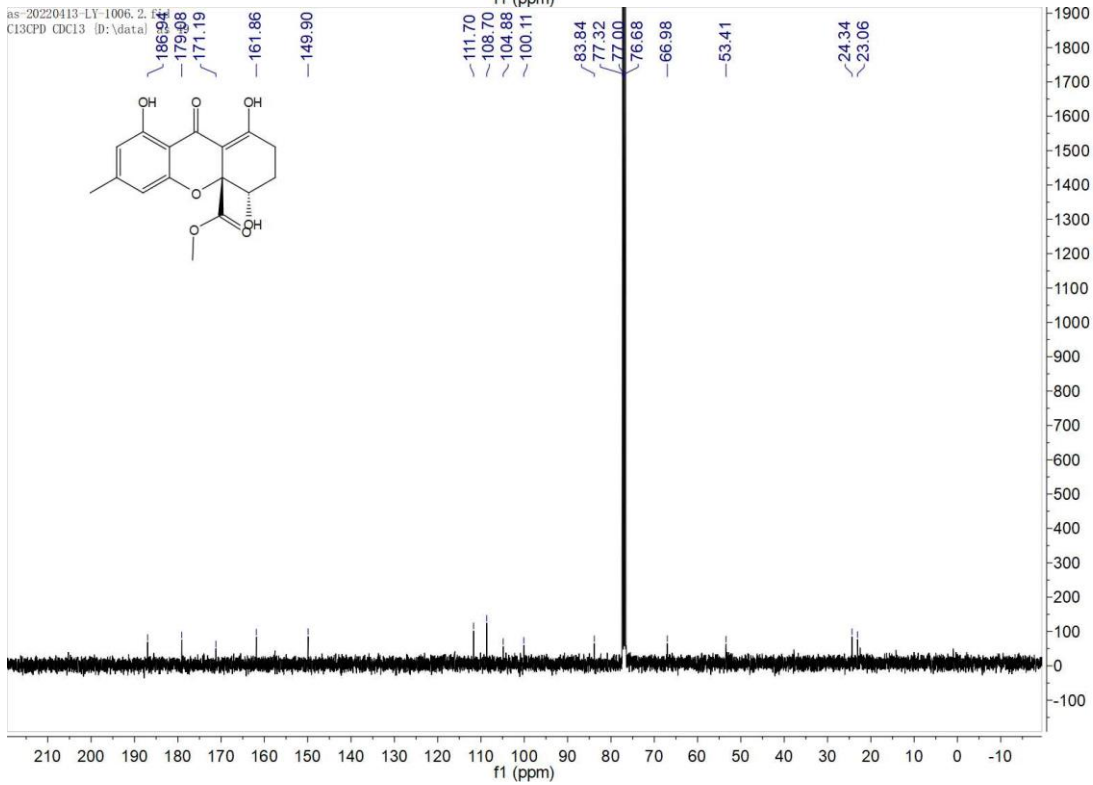

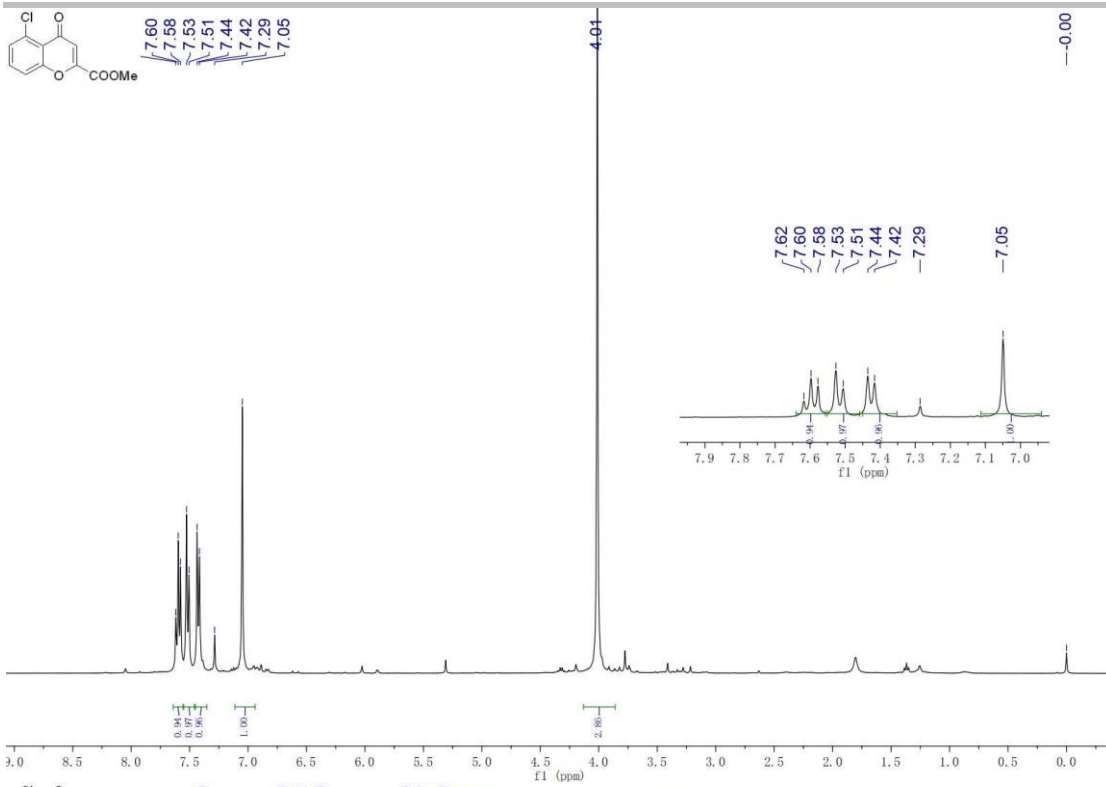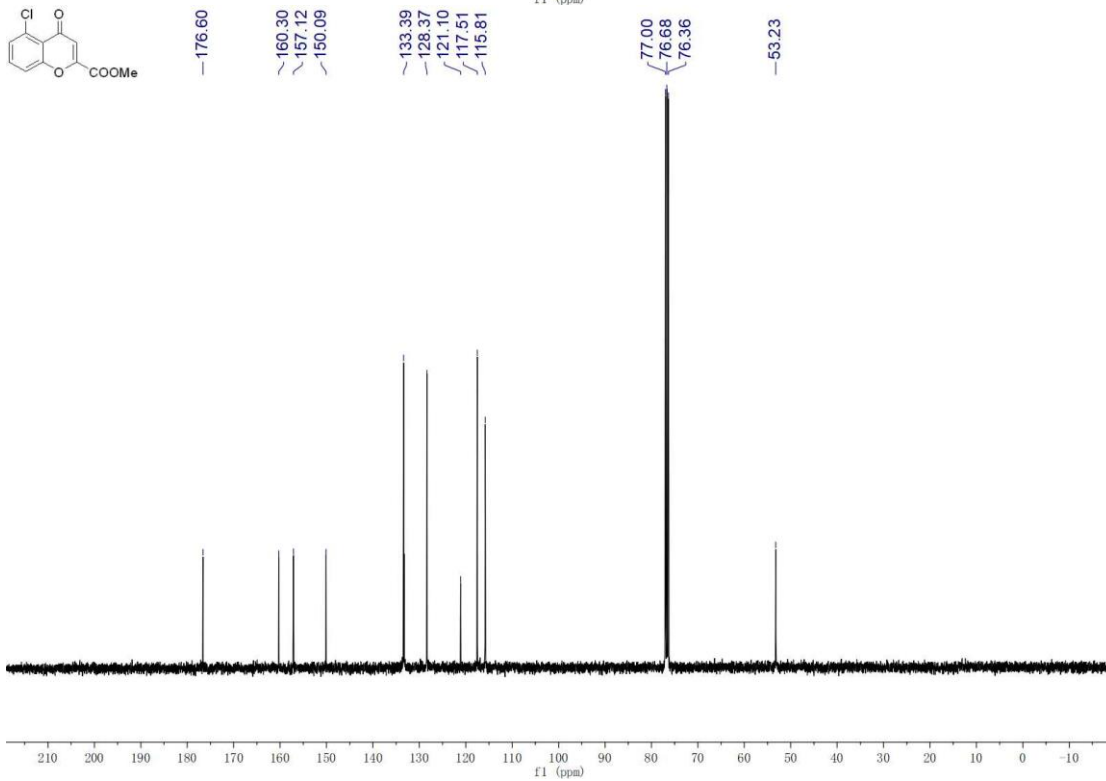

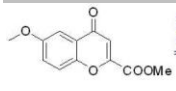

7.27  
7.11

-0.00

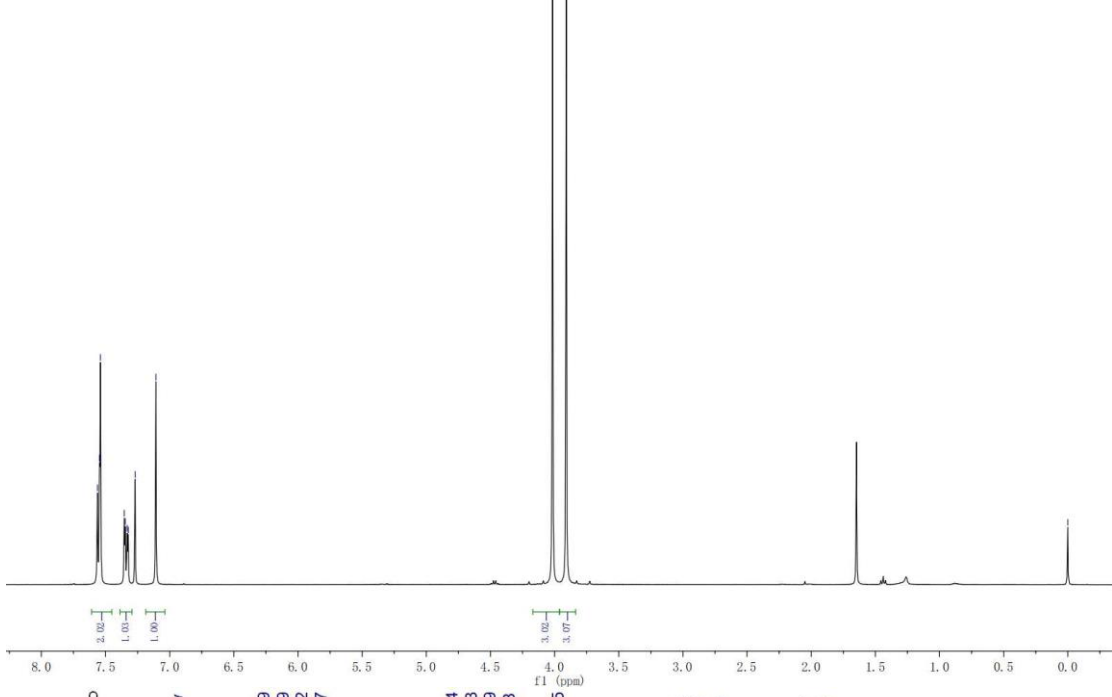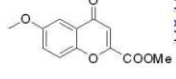

161.09  
157.49  
151.62  
150.77

125.14  
125.03  
120.19  
113.98

104.55

77.32  
77.00  
76.68

55.97  
53.50

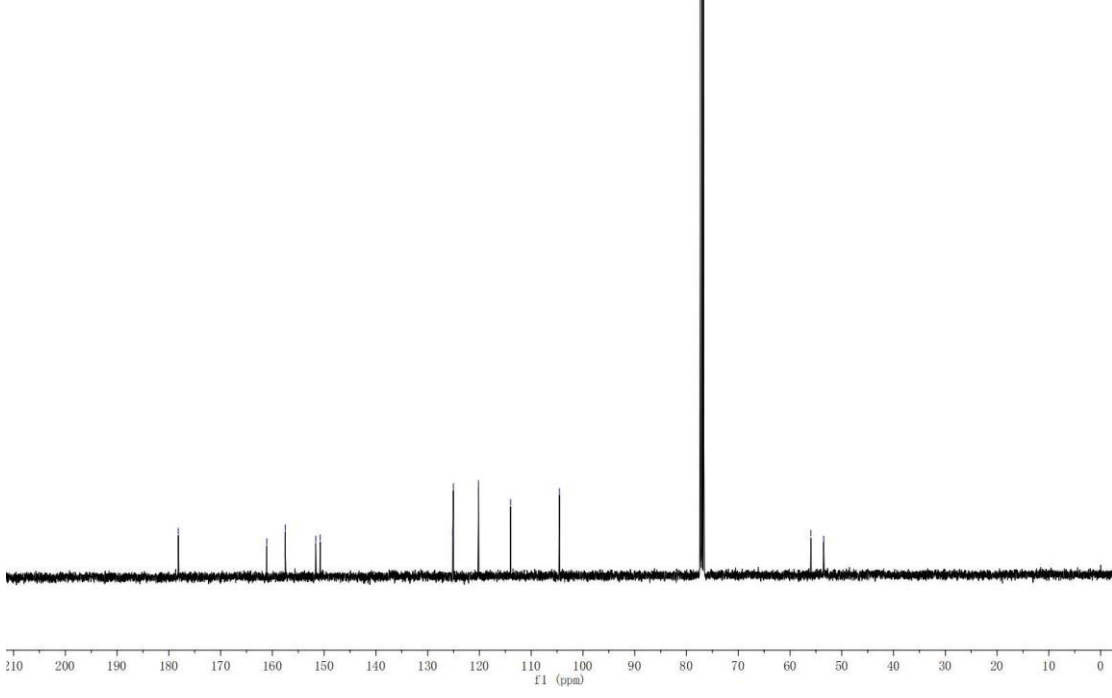

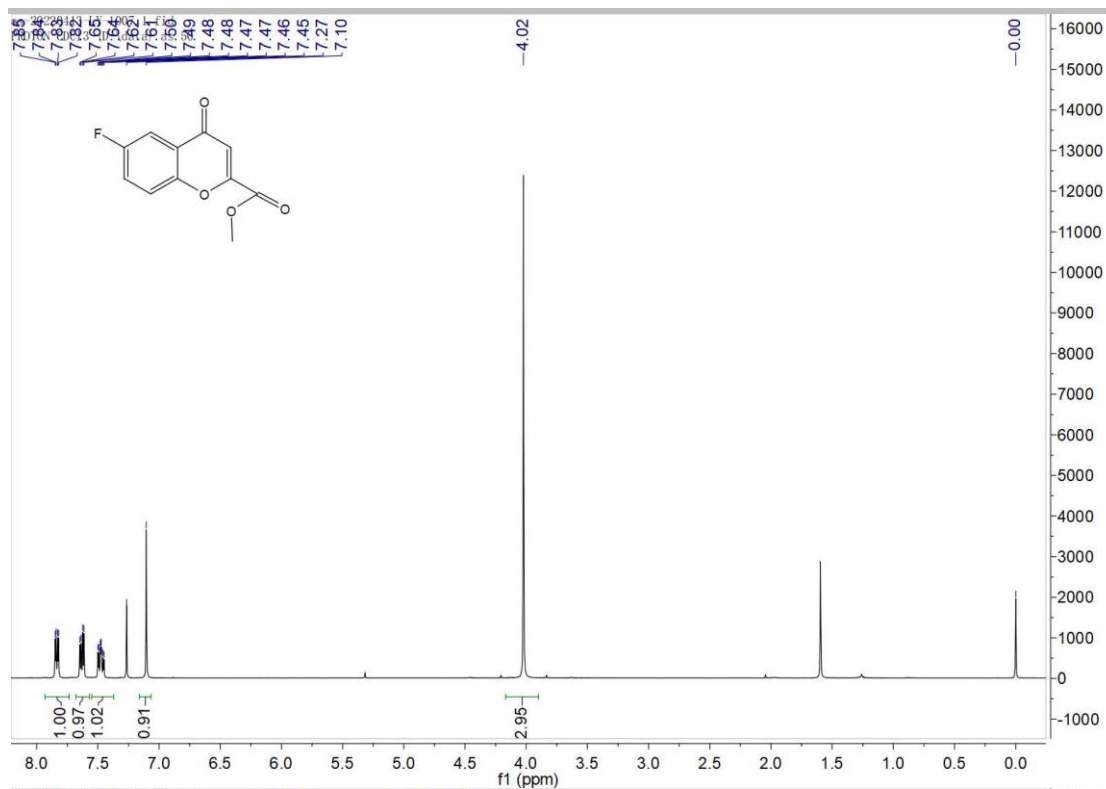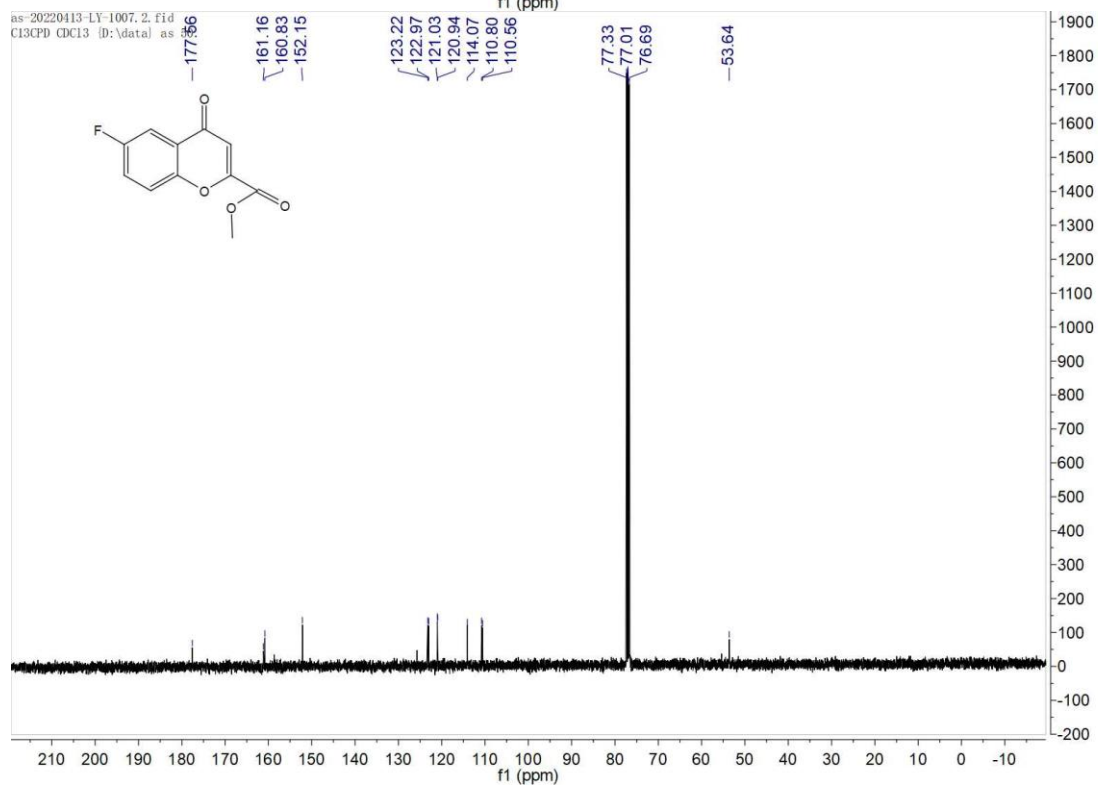

as-20220413-LY-1007\_3.Fid  
F19CPD CDCl3 [D:\data] as 50

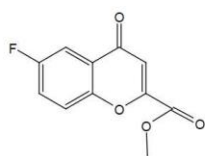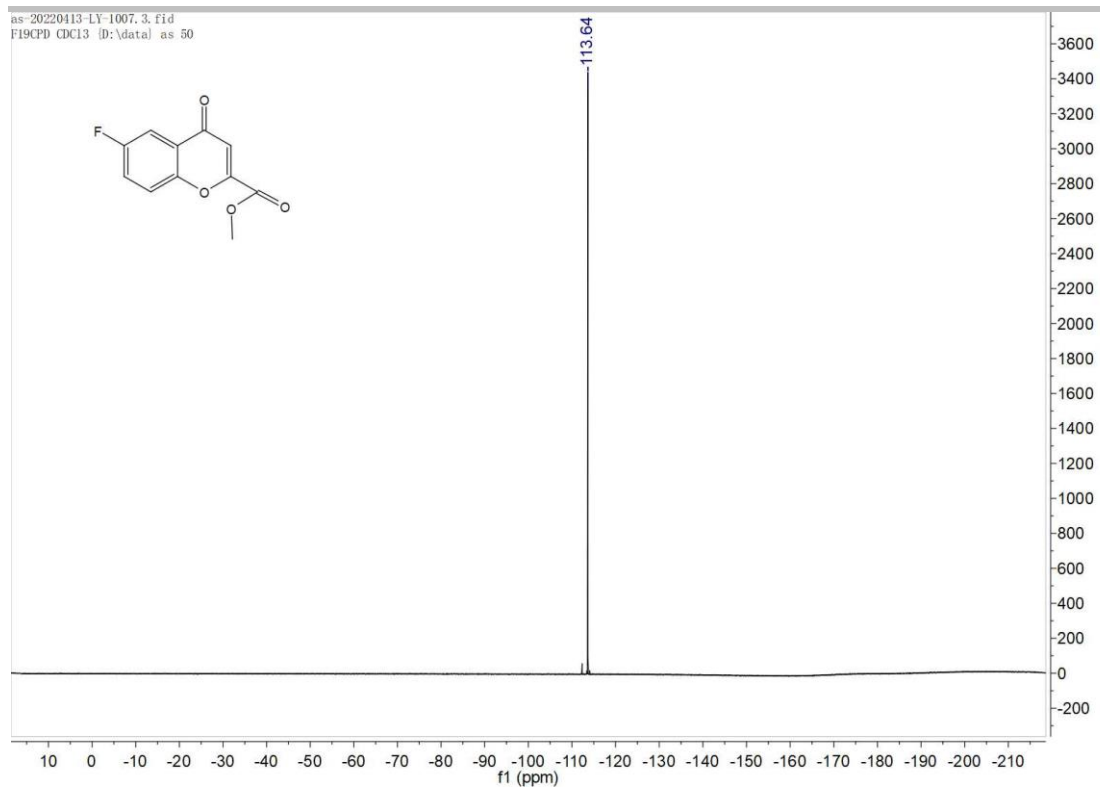



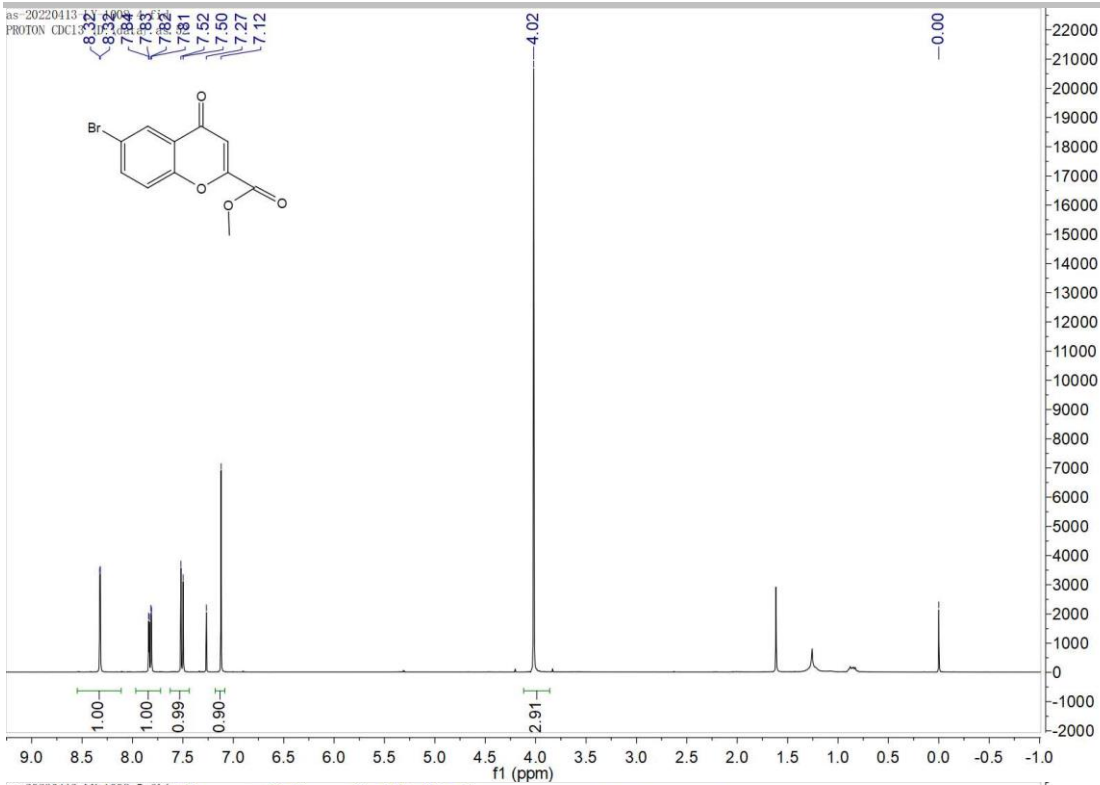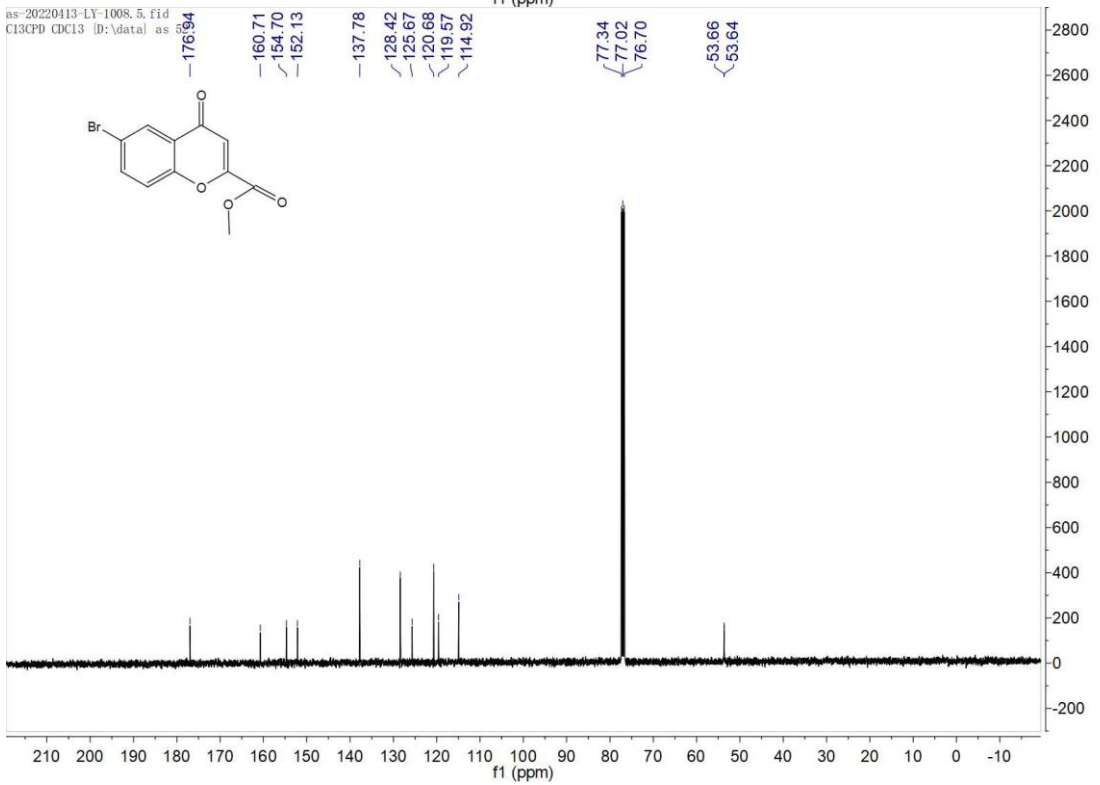

as-20220413-LY-1009.1.Fid  
PROTON CDCl3 [D:\data] as 51

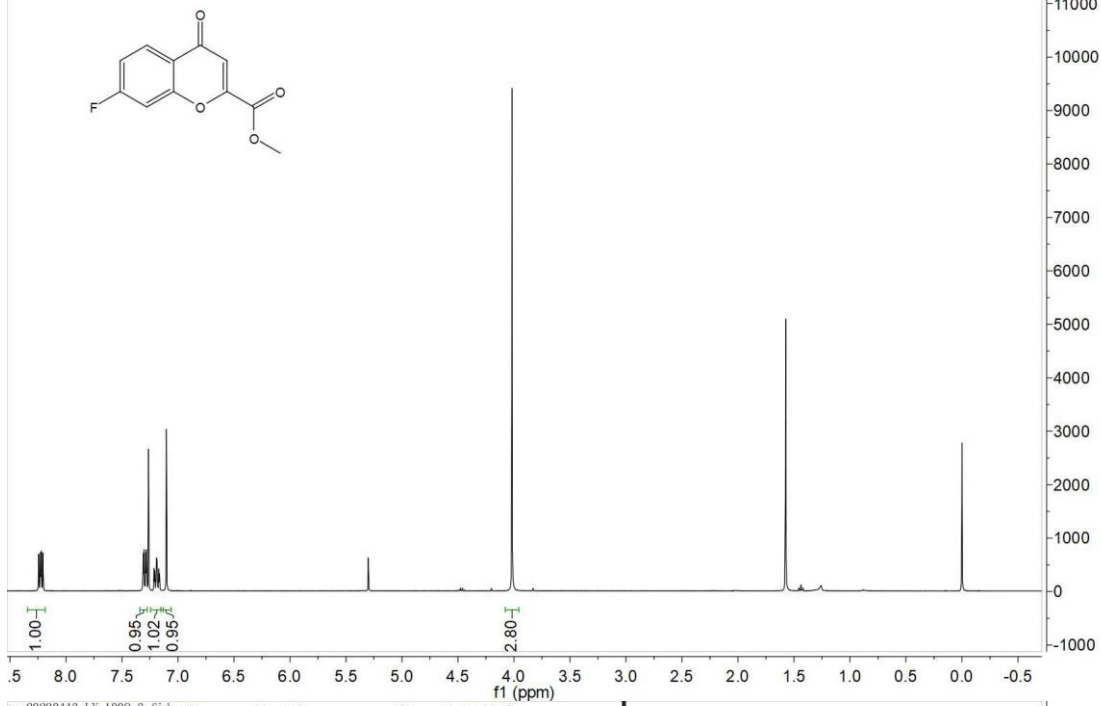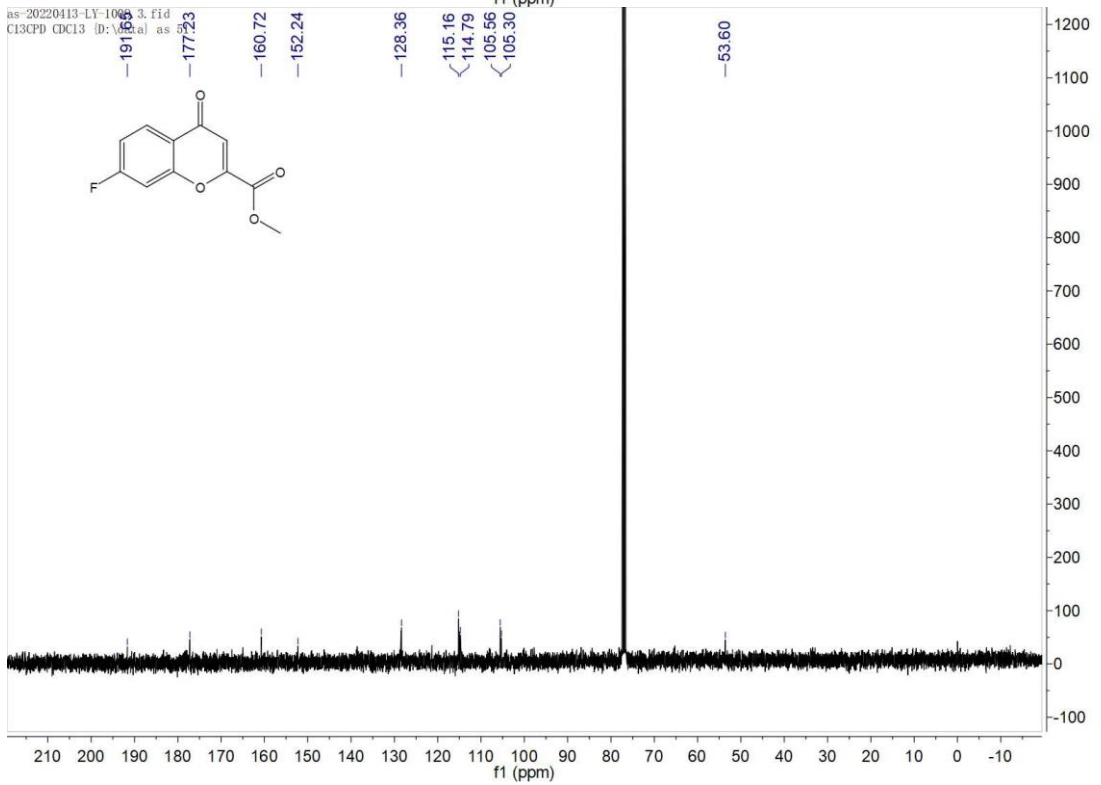

as-20220413-LY-1009\_4.Fid  
F19CPD CDCl3 [D:\data] as 51

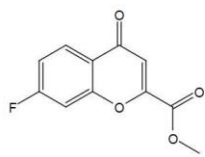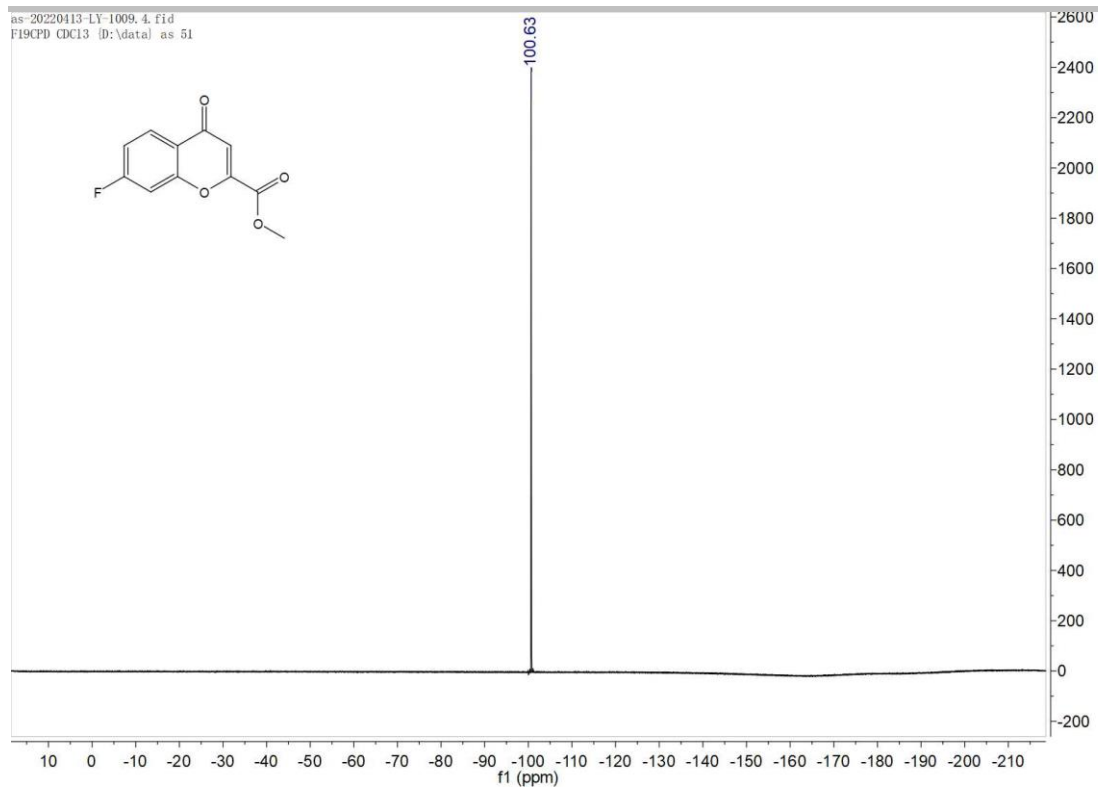

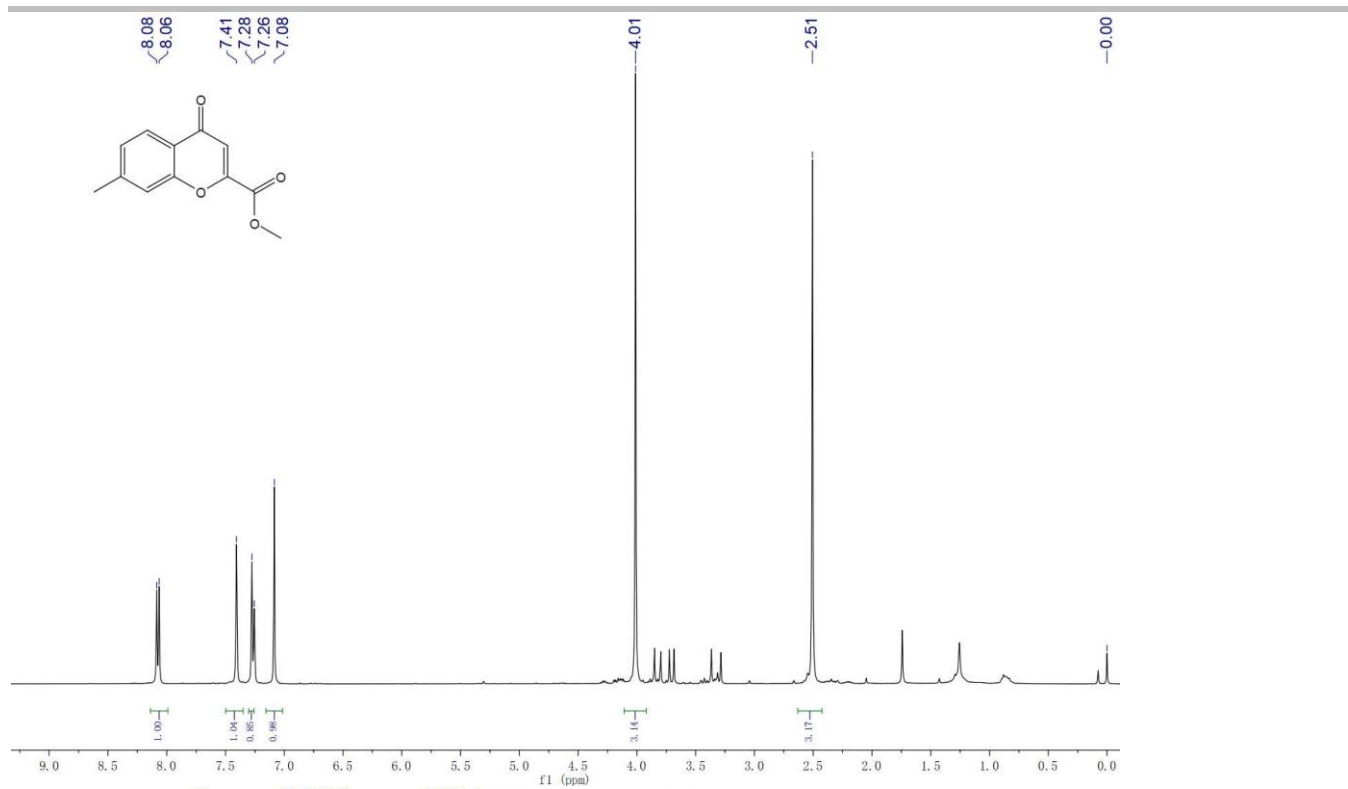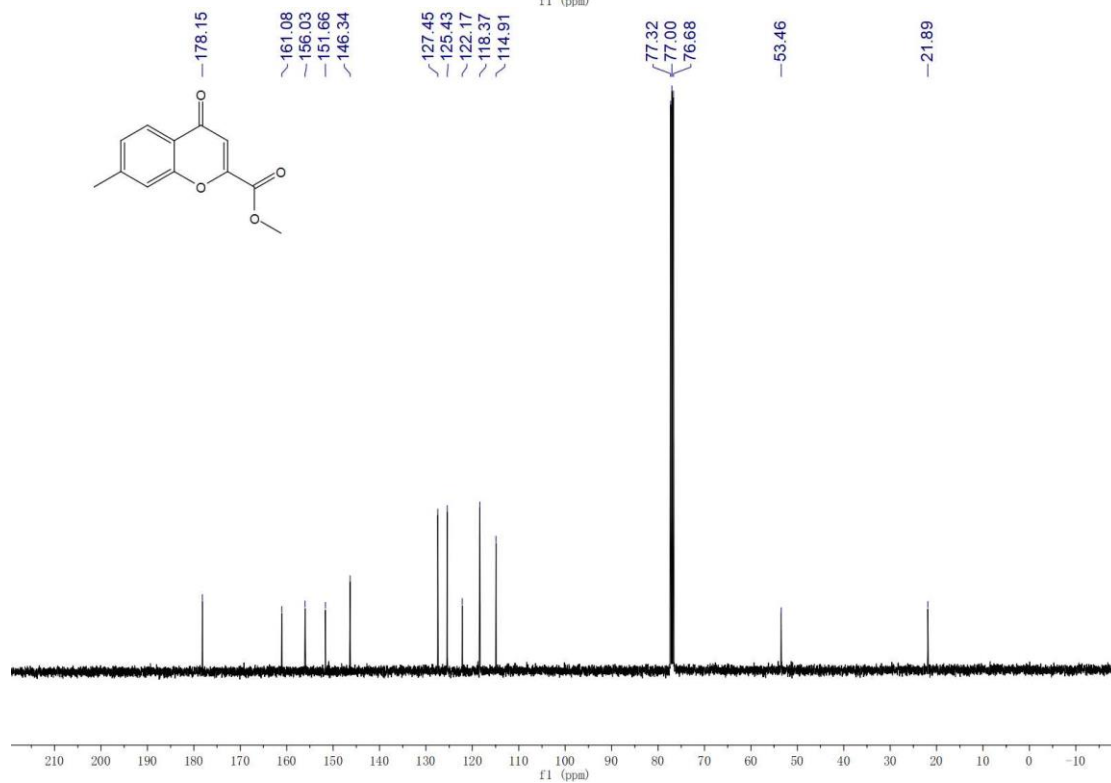

as-20220113-LY-1010-1-F10  
PK 8.664  
8.714  
7.965  
7.977  
7.345  
7.333  
7.311  
7.265  
7.144

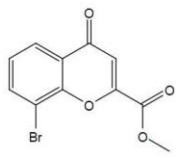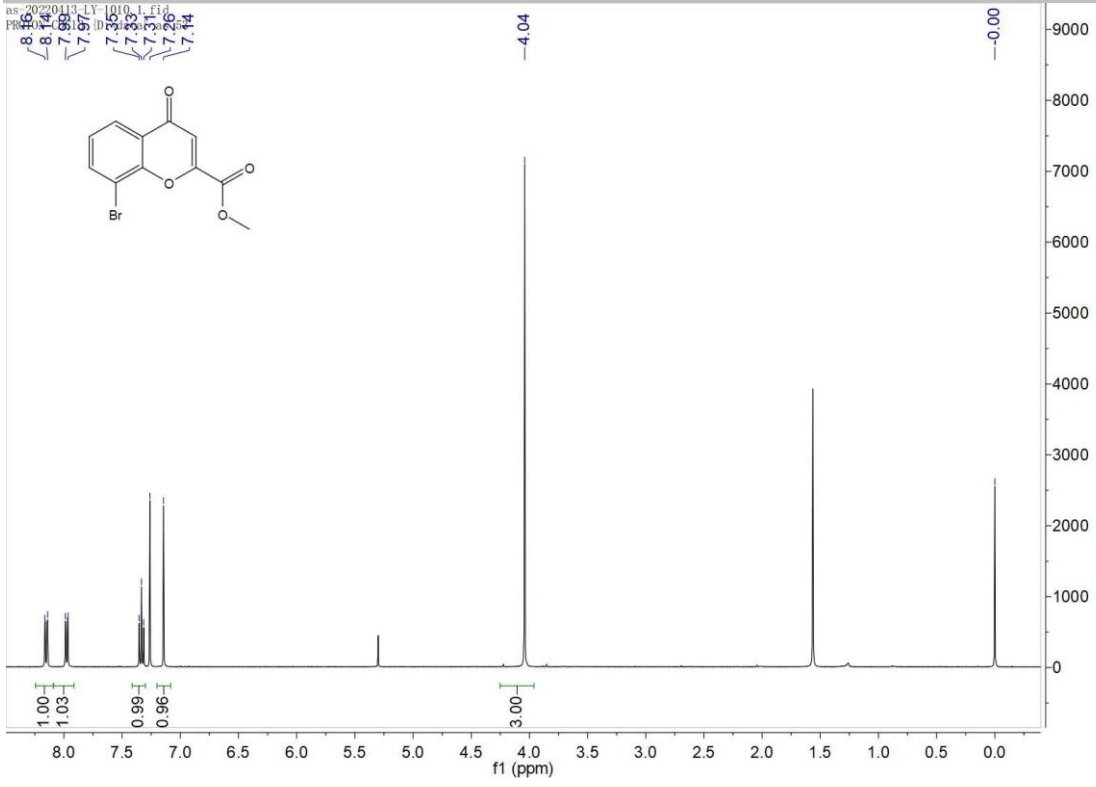

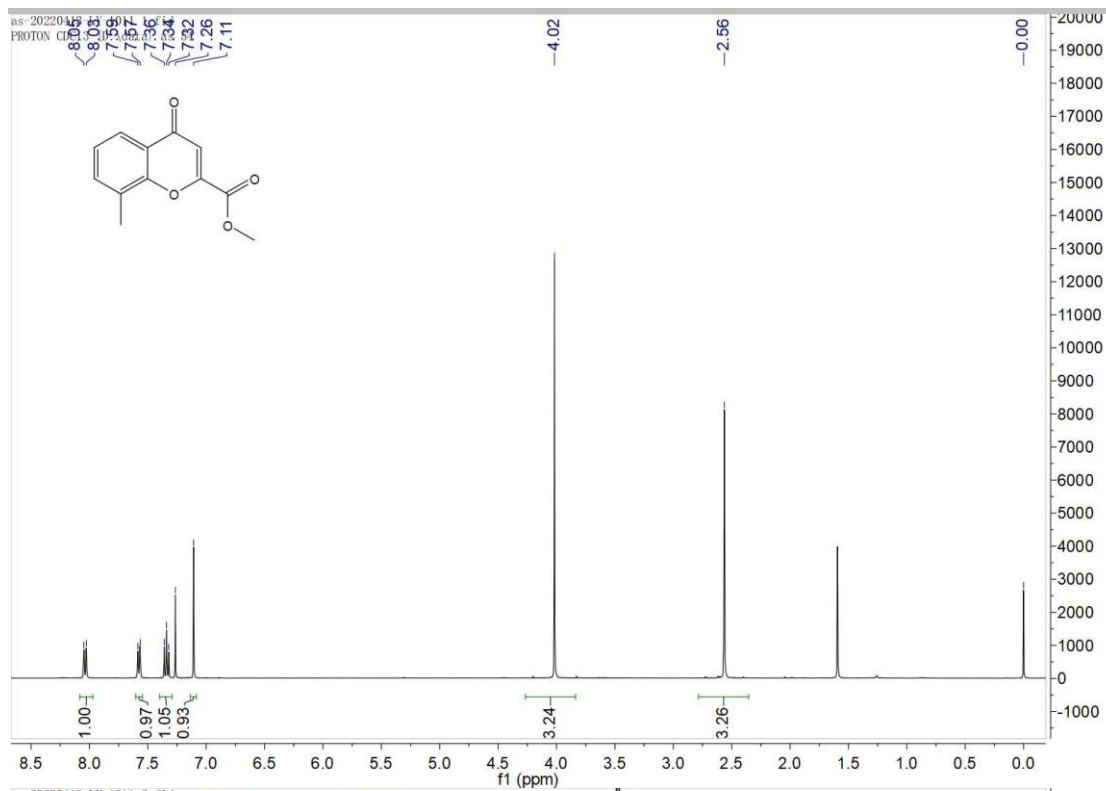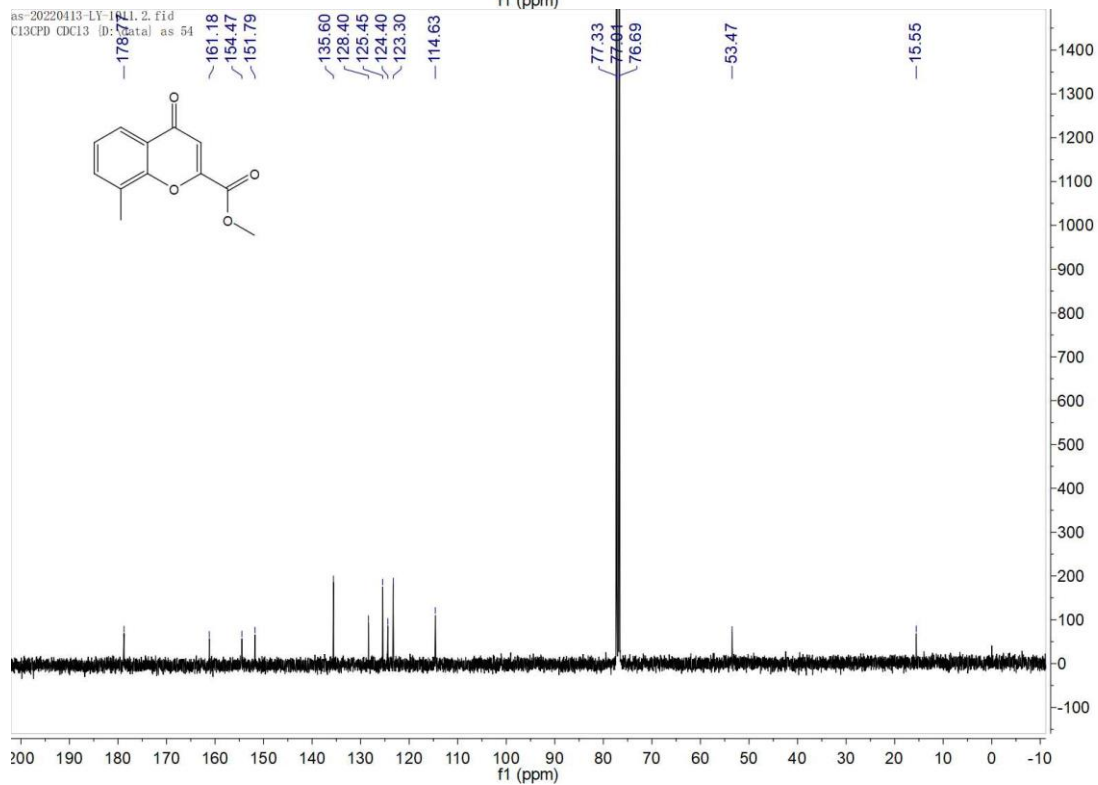

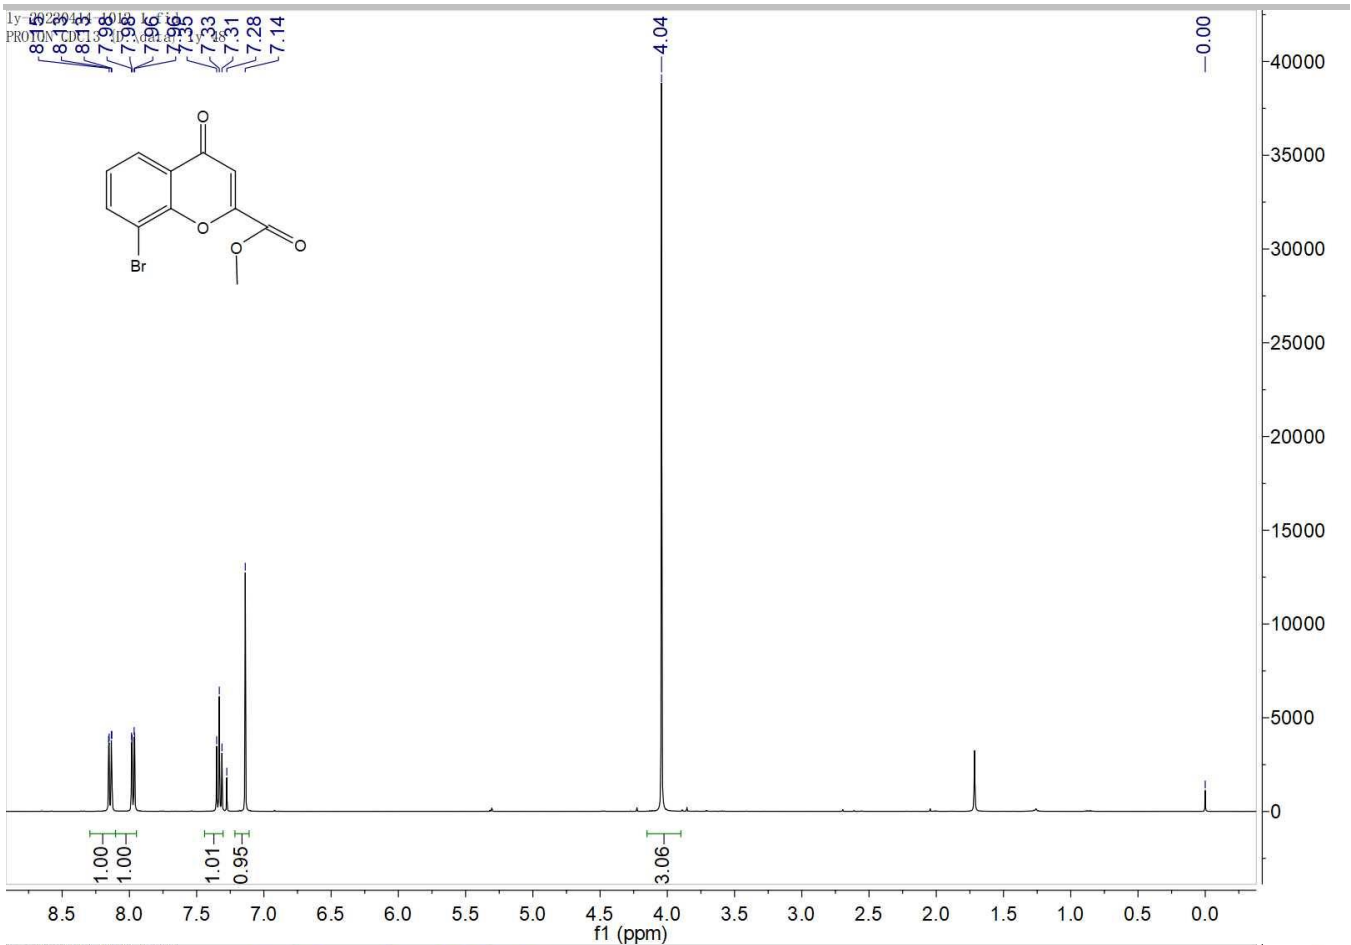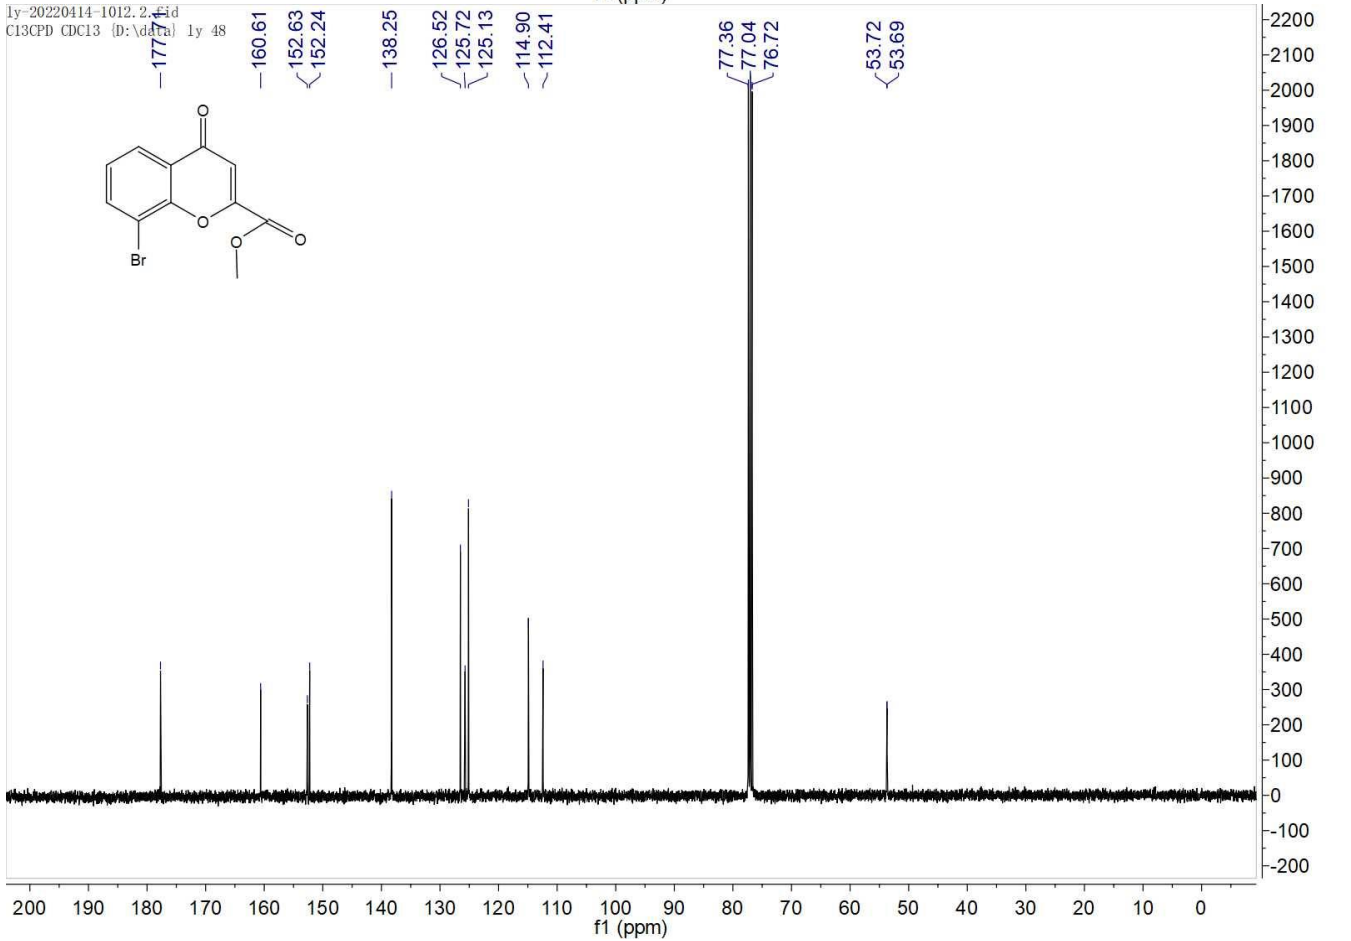

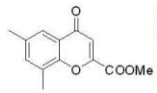

~7.40  
~7.26  
~7.09

-4.01

~2.53  
~2.42

-0.00

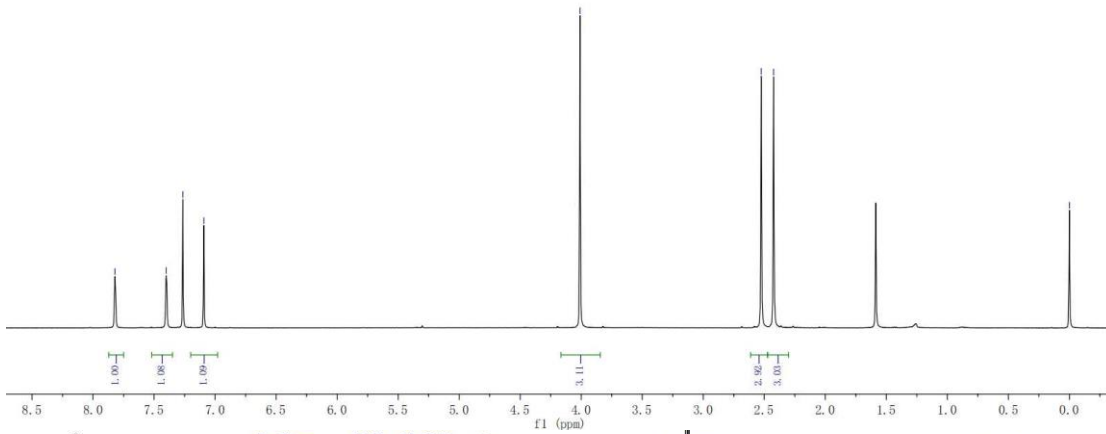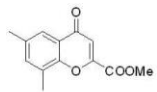

~152.77  
~152.54  
~151.61

~137.00  
~135.49

~128.03  
~124.09

~122.56  
~114.45

77.32  
77.00  
76.68

-53.42

-20.94  
-15.47

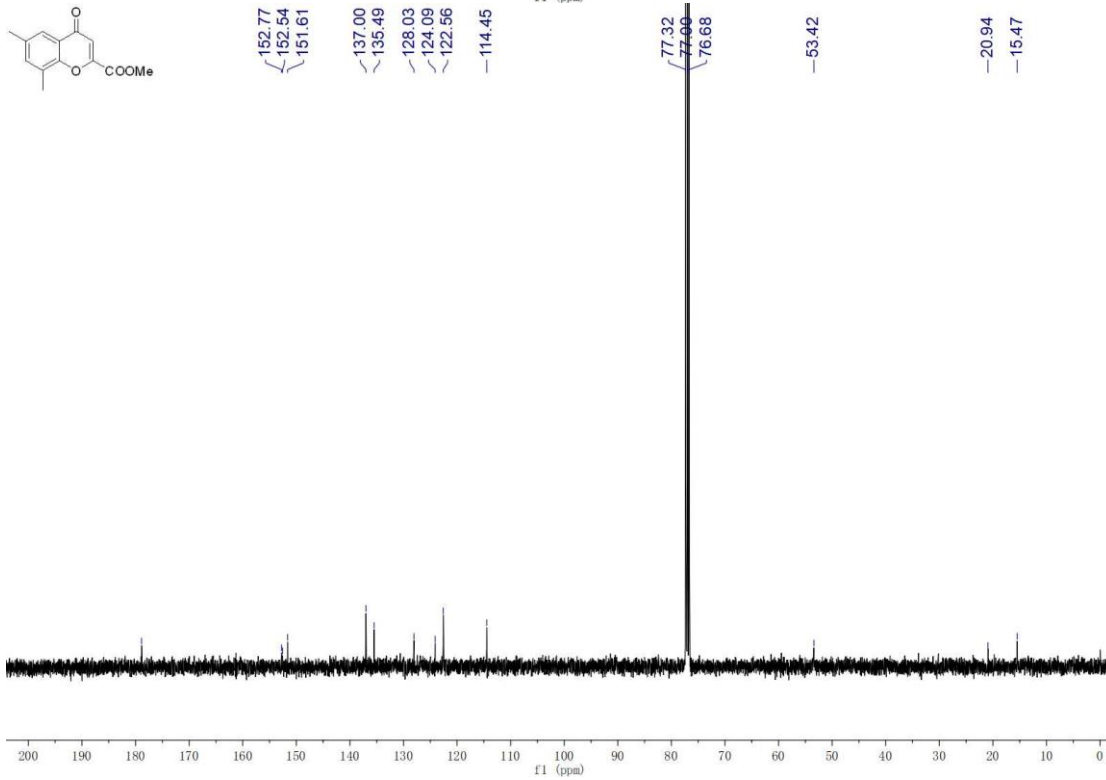



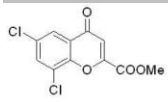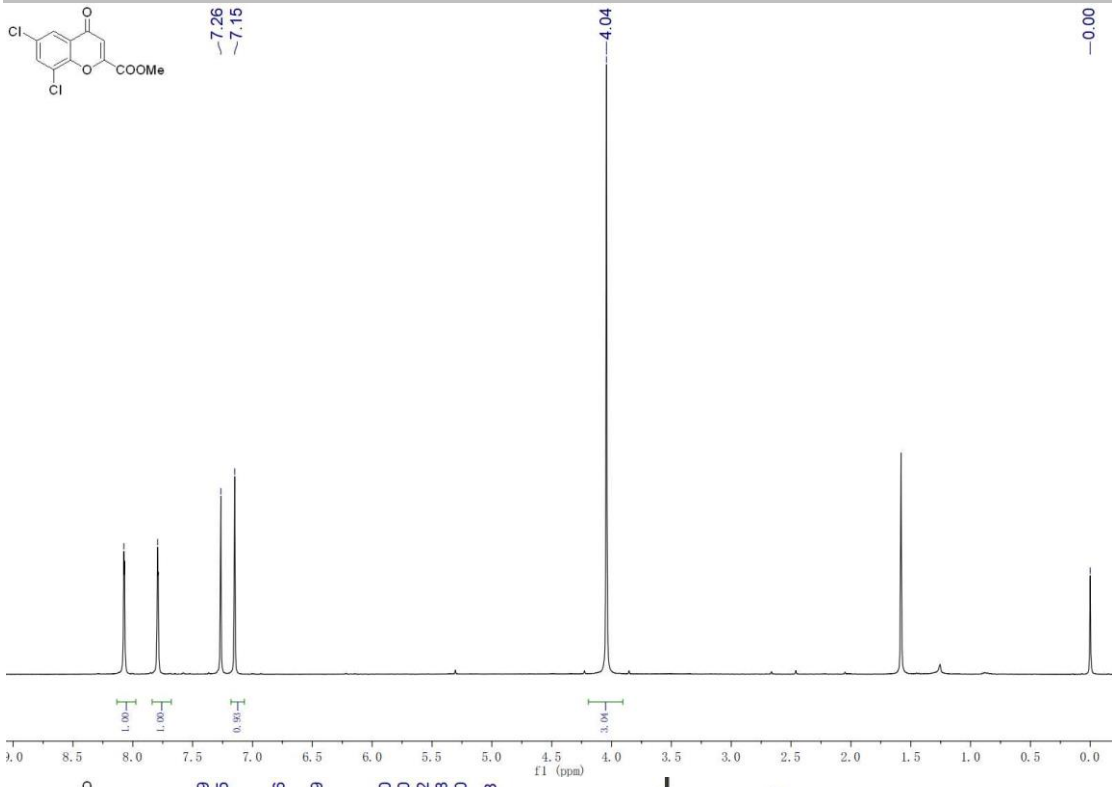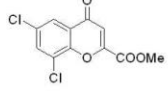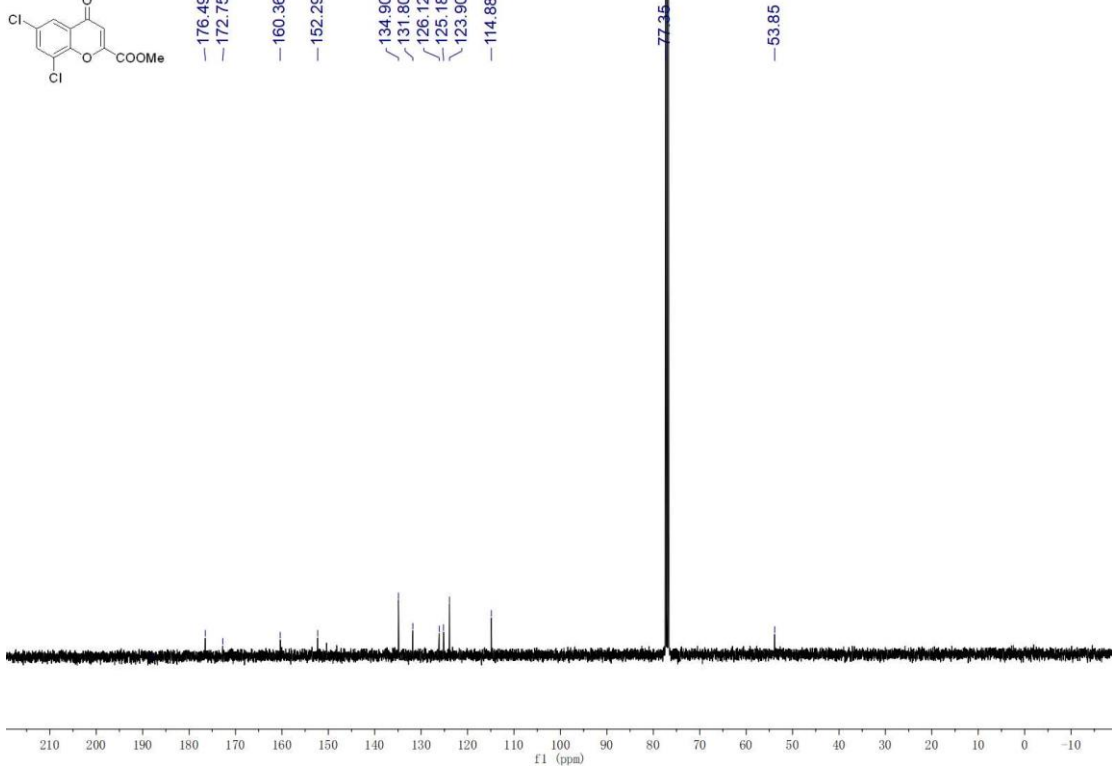

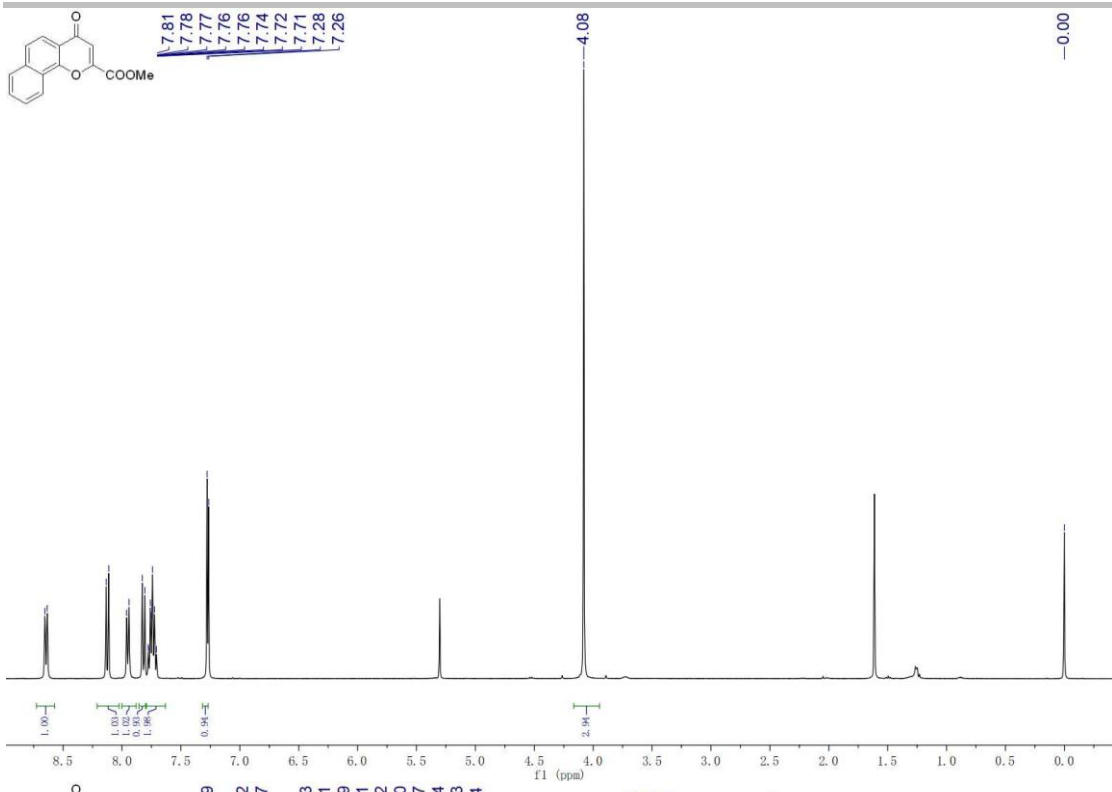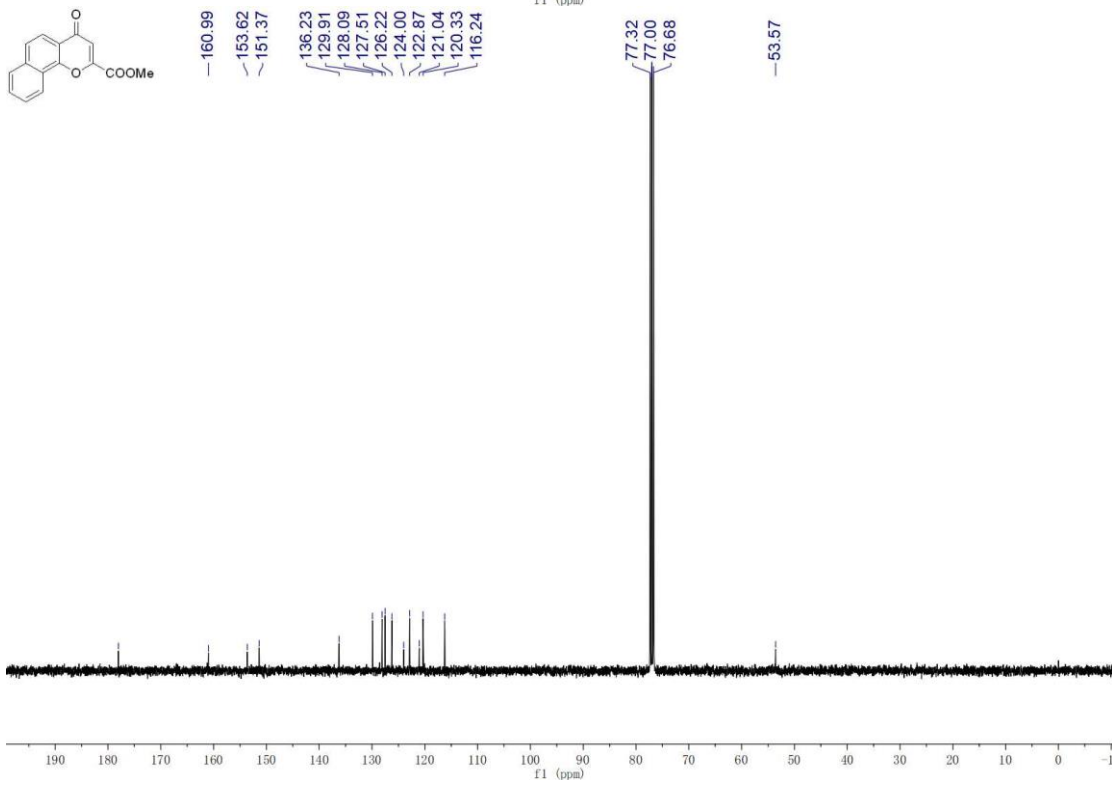

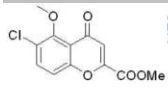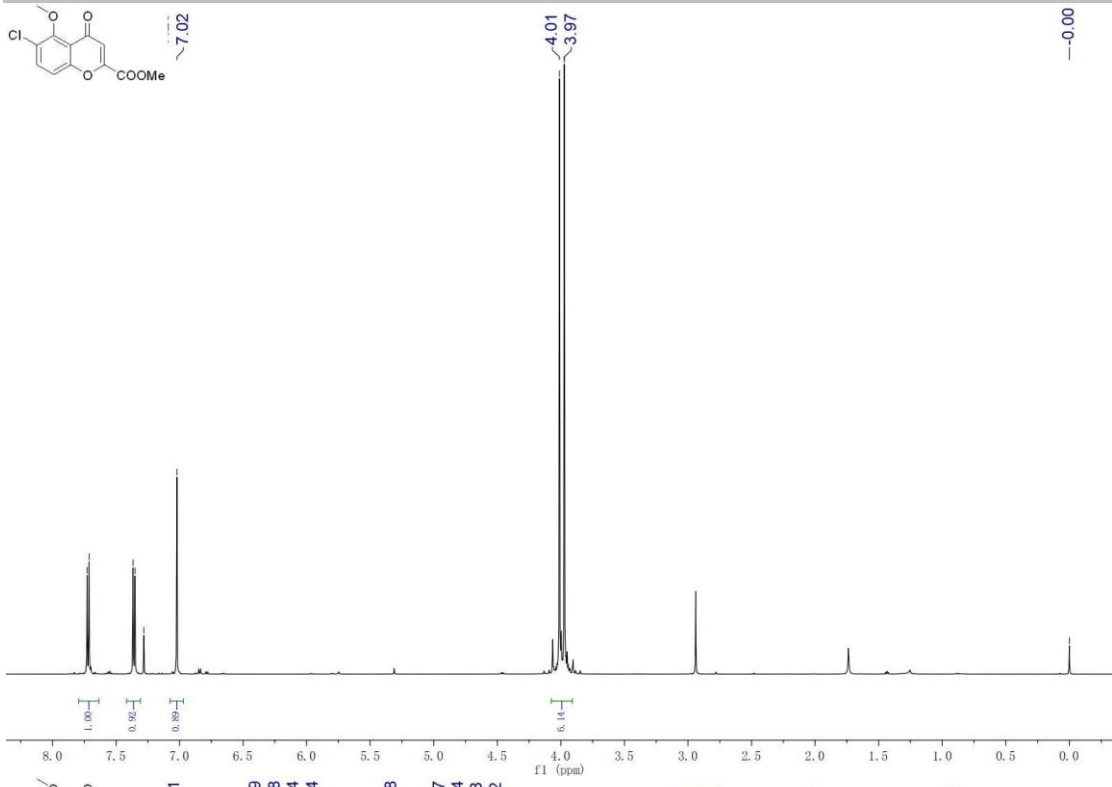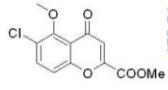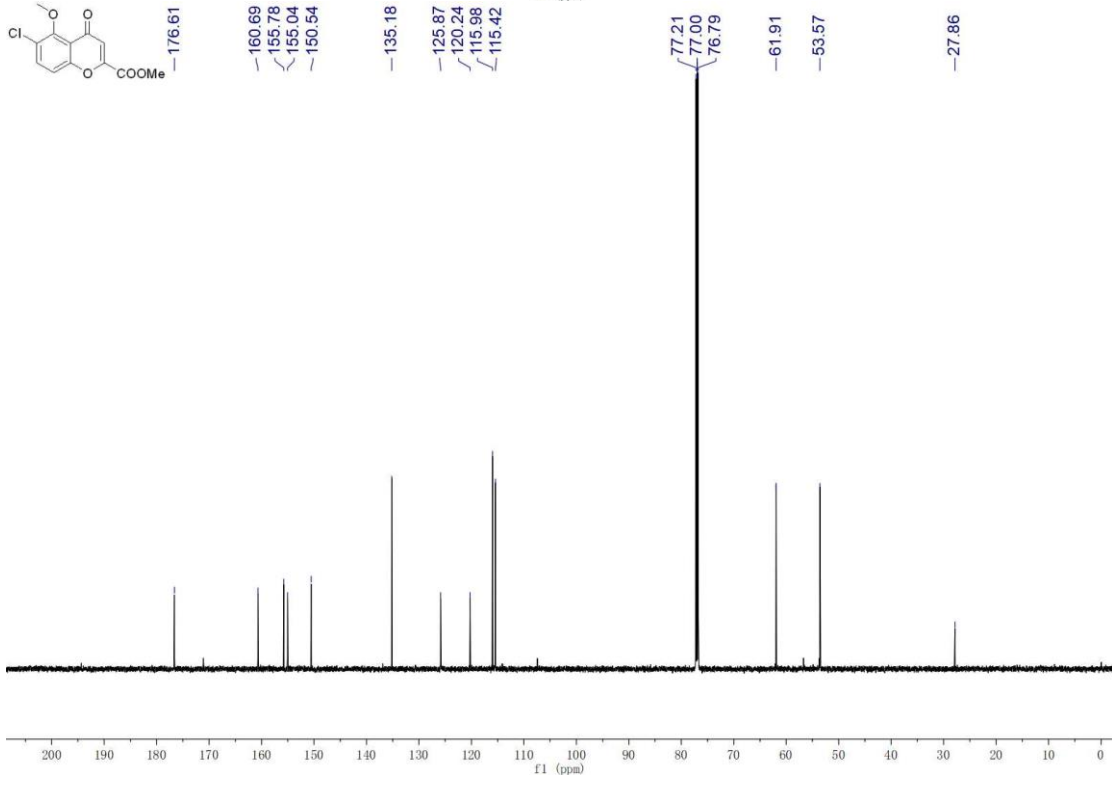

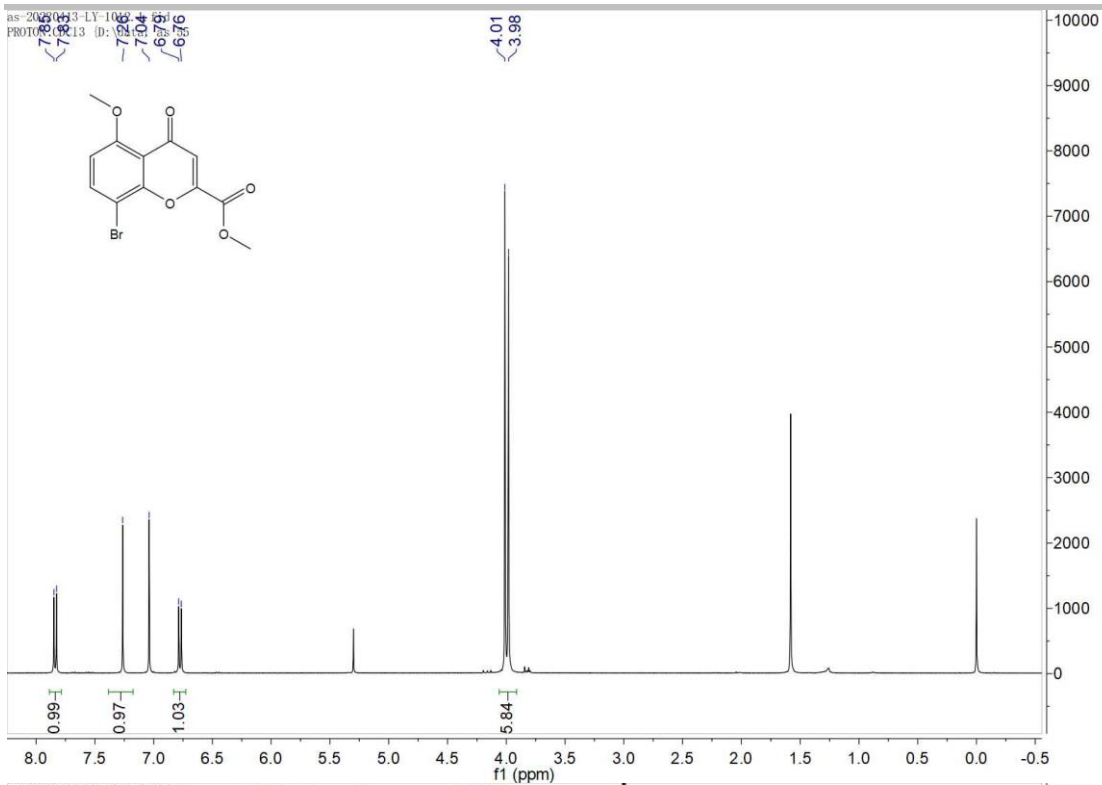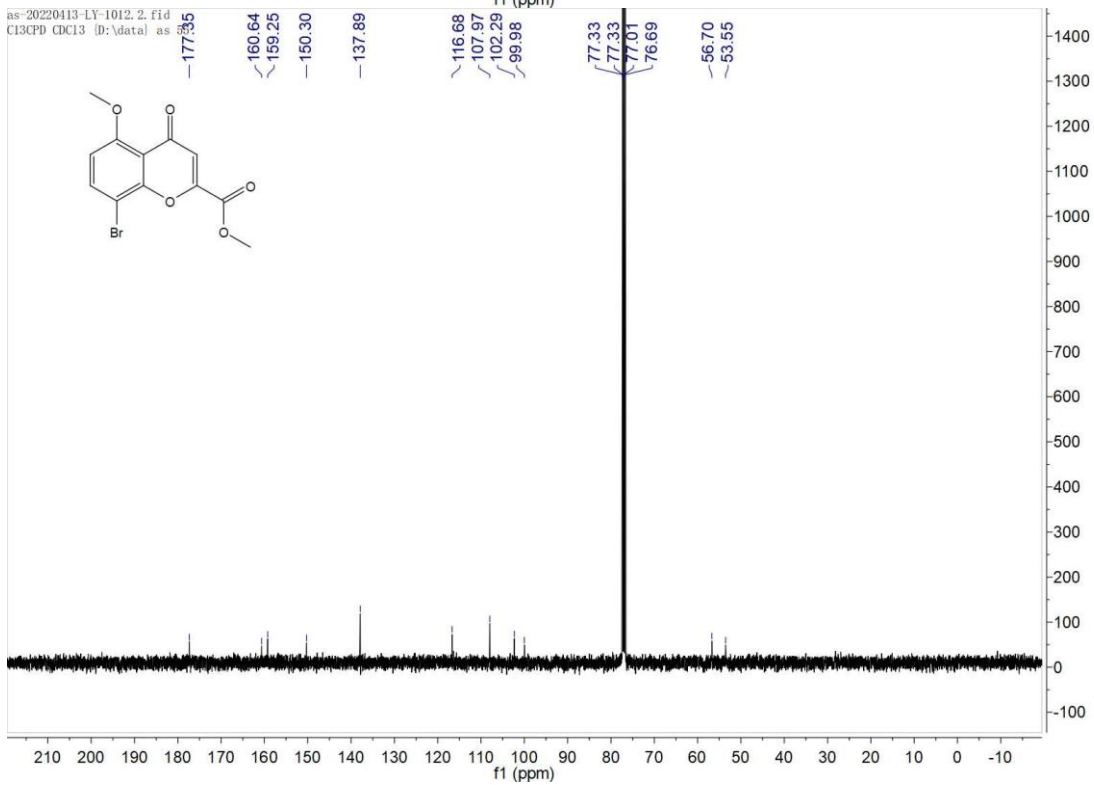

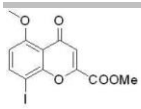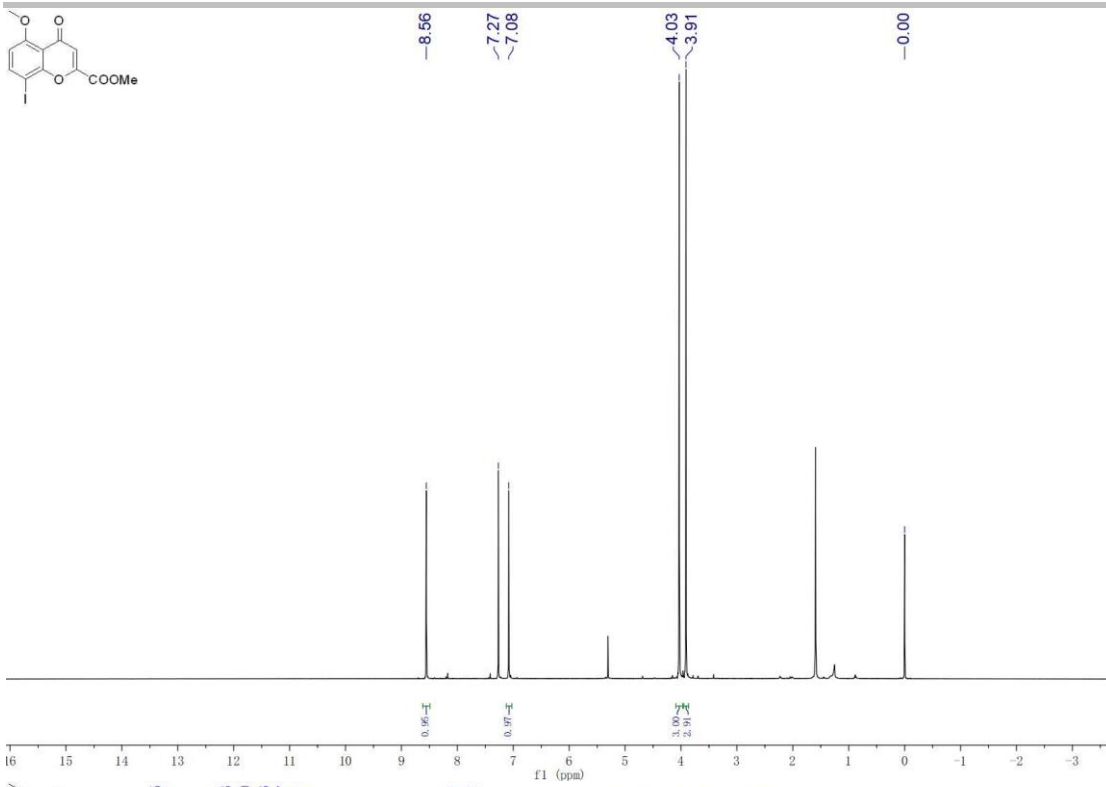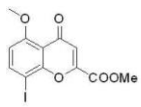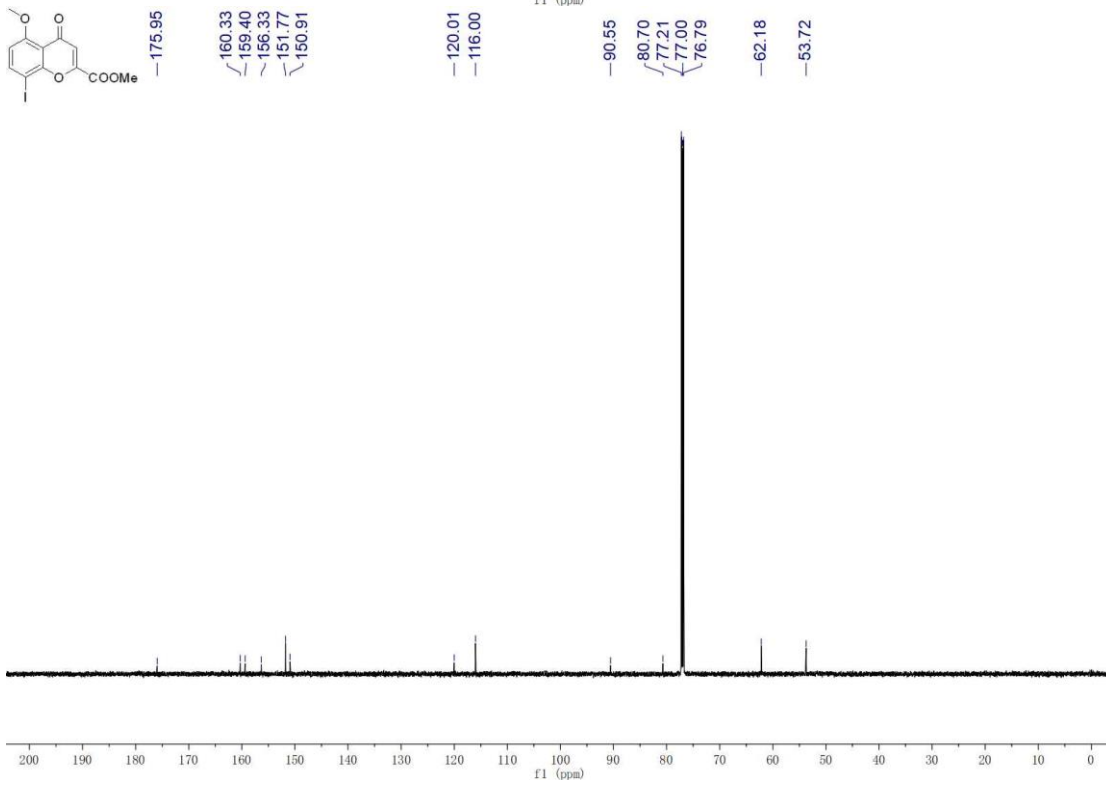

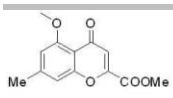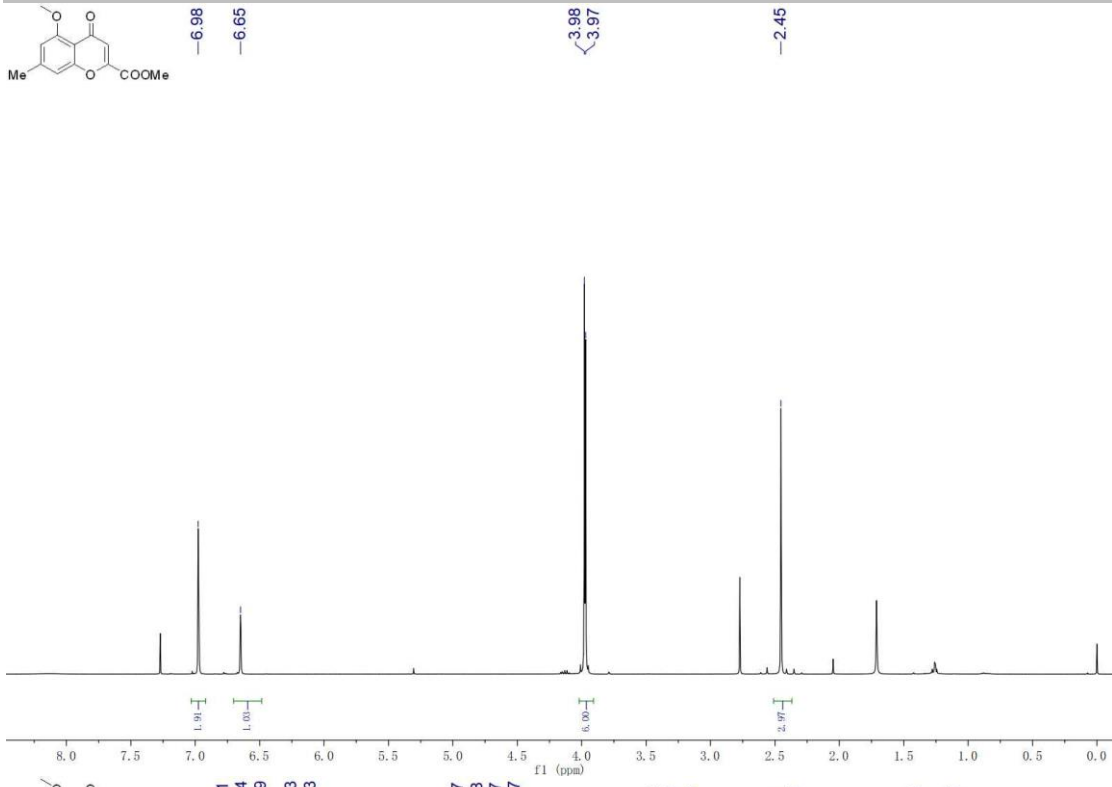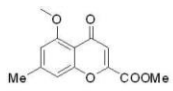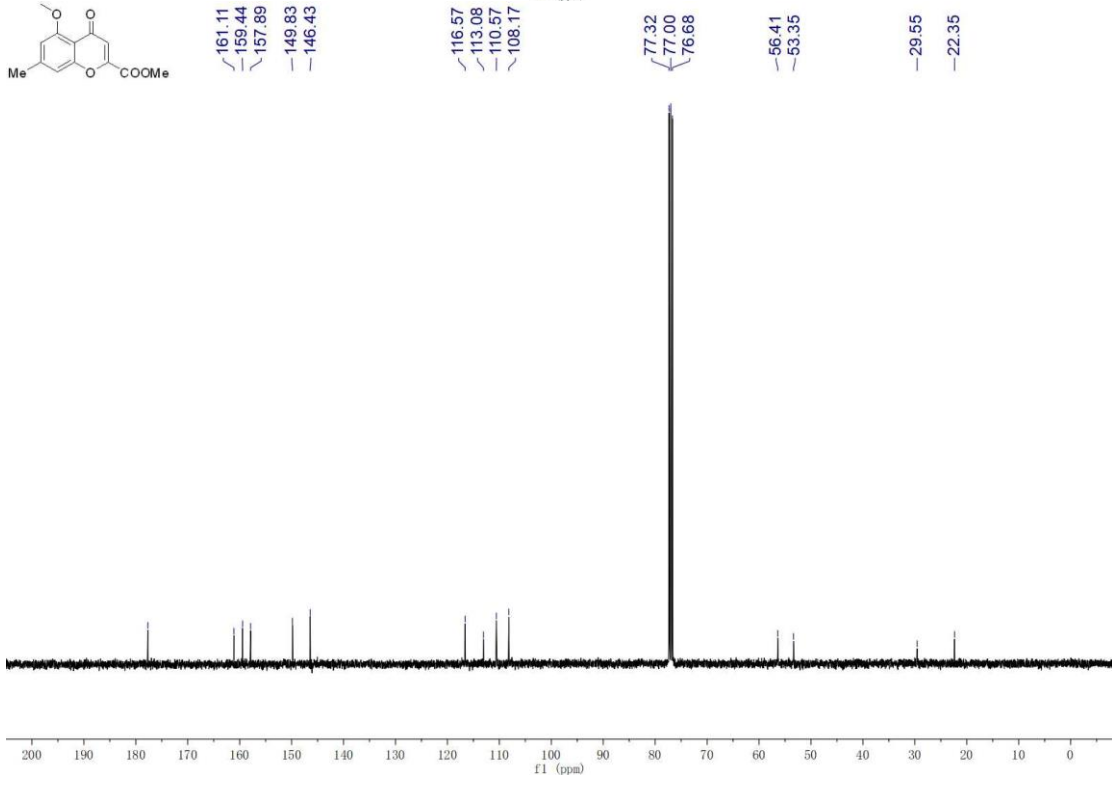

ly-20211227-LY-866.1.1.1r  
PROTON CDCl3 (D:\data) ly

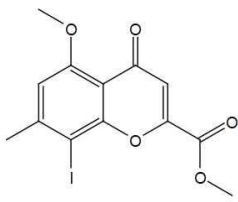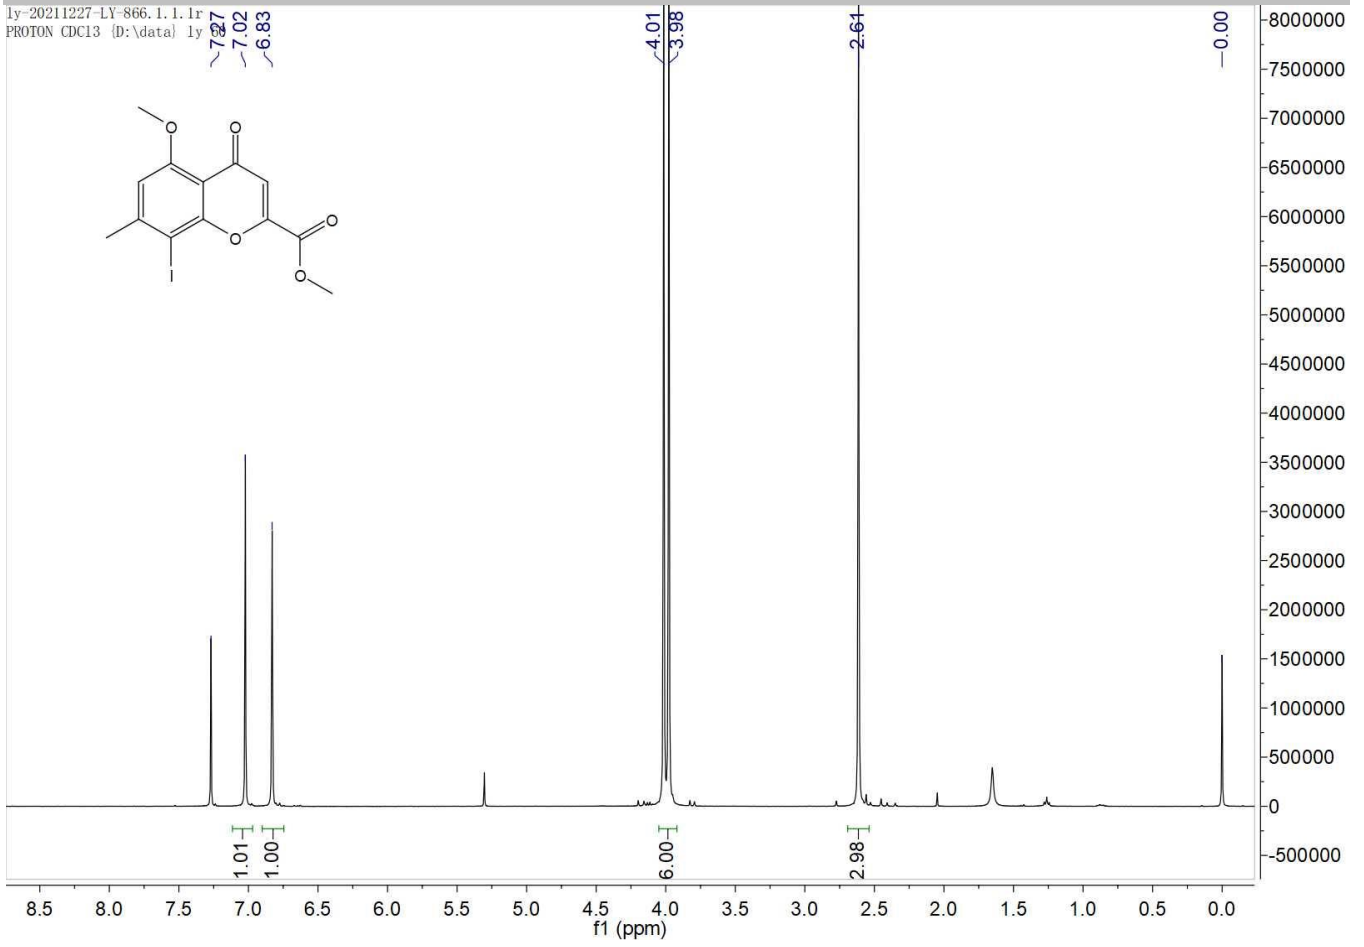

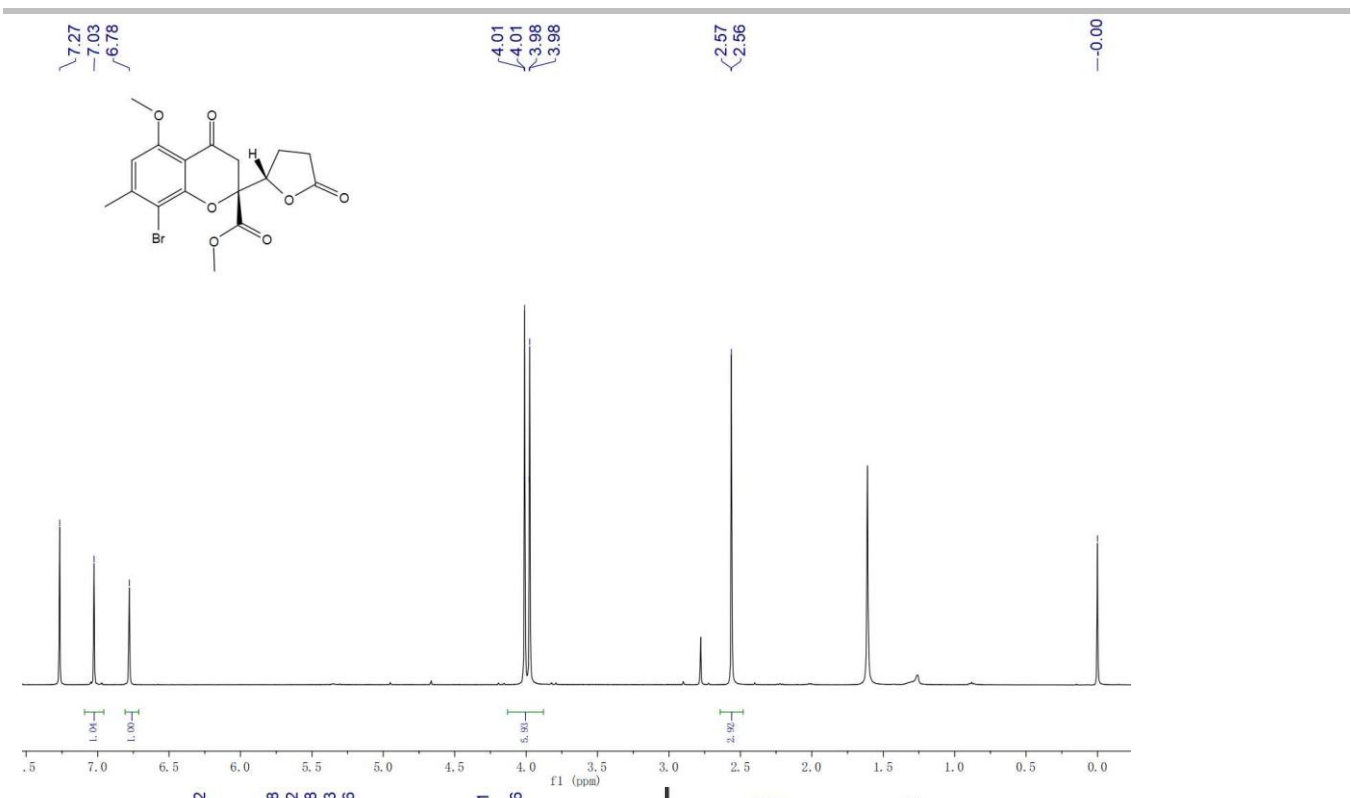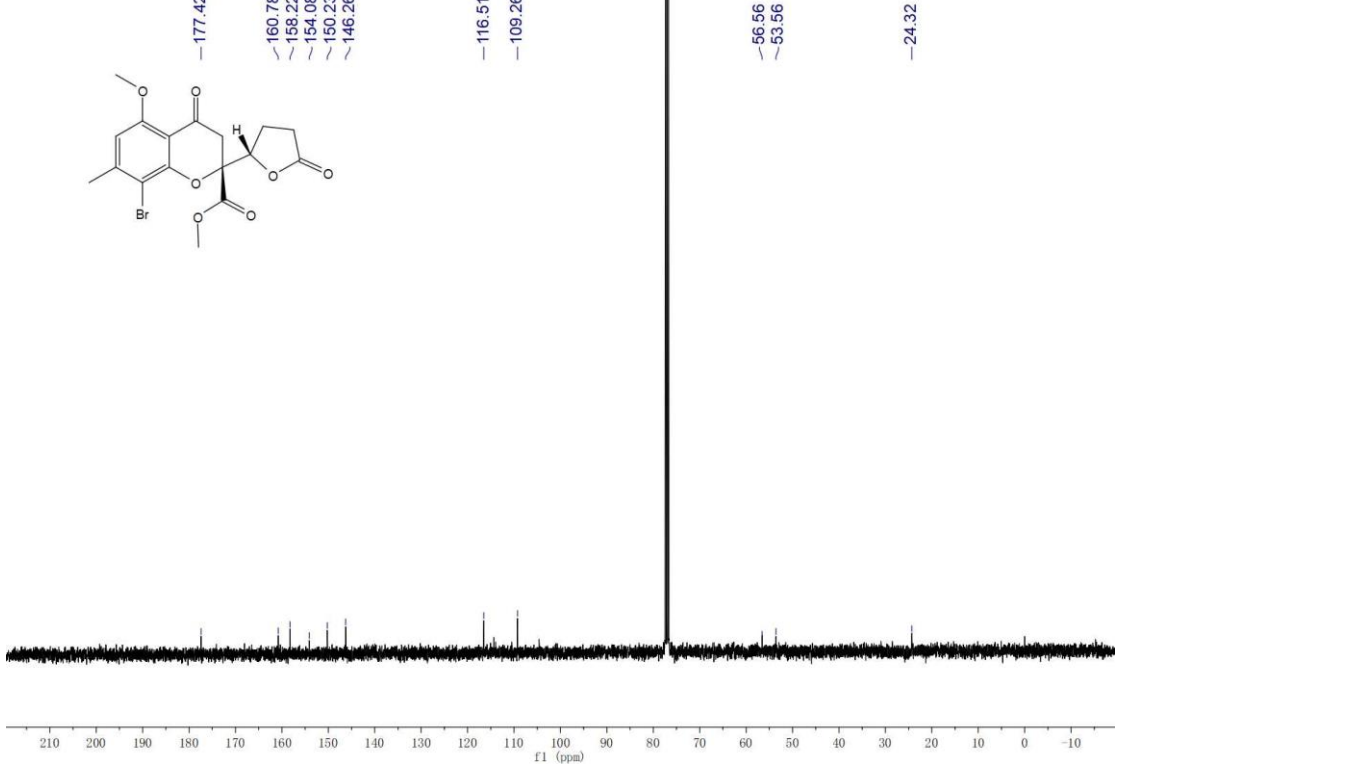



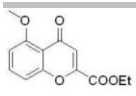

7.63  
7.62  
7.61  
7.30  
7.17  
7.16  
7.02  
6.86  
6.85

4.46  
4.45  
4.44  
4.43  
-3.99

1.44  
1.43  
1.41

-0.00

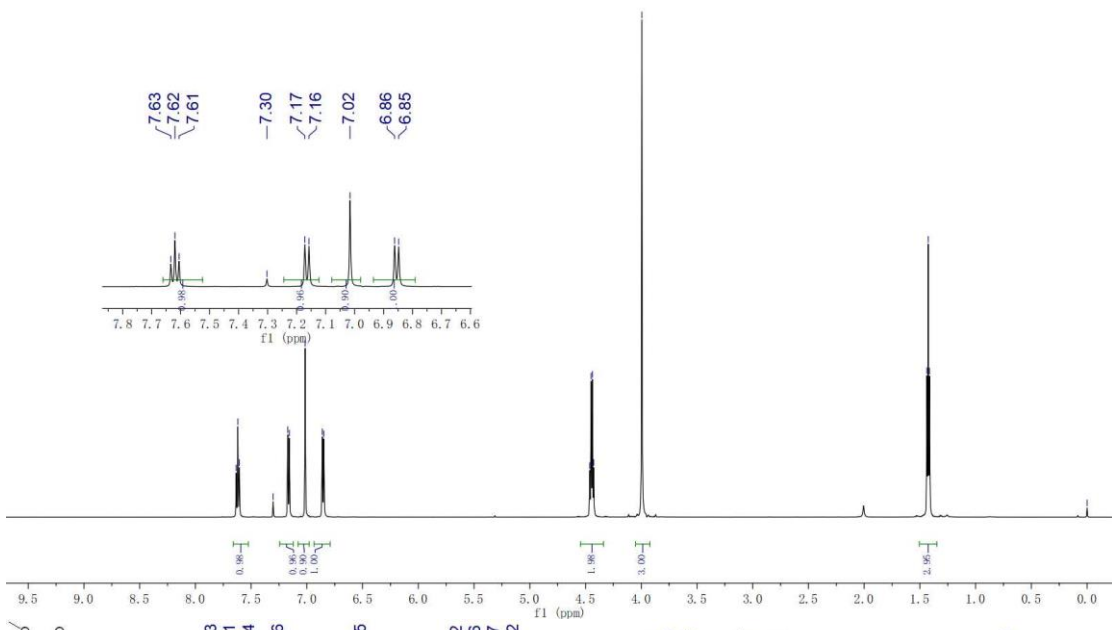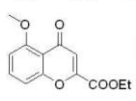

160.43  
159.61  
157.84  
150.16

134.65

116.32  
115.06  
110.47  
106.72

77.21  
77.00  
76.79

62.77  
56.41

13.99

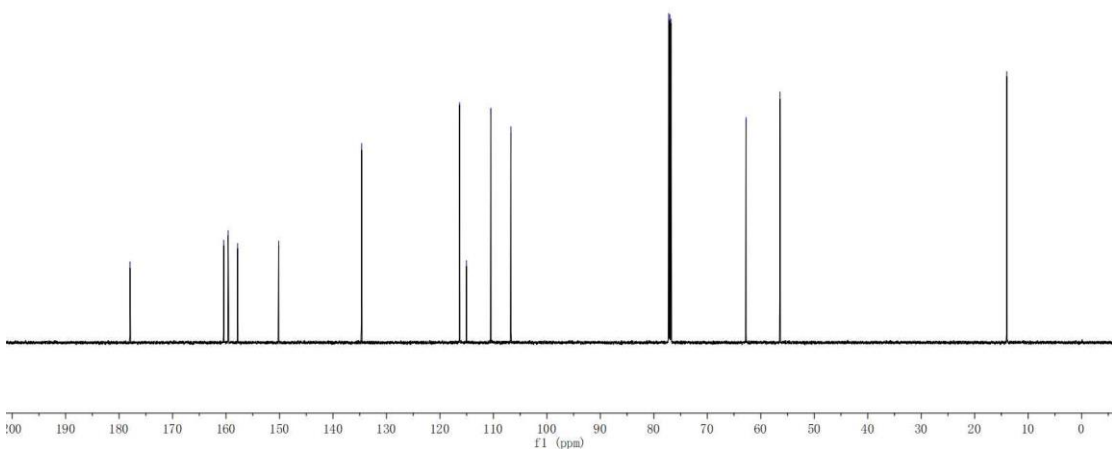

Supplement: d2sc02541h1.pdf [file d2sc02541h1.pdf]
